# Supplementary material for: Towards a better understanding of preimplantation genetic screening for aneuploidy: insights from a virtual trial for women under the age of 40 when transferring embryos one at a time
Source: Reprod Biol Endocrinol. 2017 Jun 30;15:49. doi: 10.1186/s12958-017-0269-y (PMC5493873; doi:10.1186/s12958-017-0269-y)
Supplement: Additional file 1: — Table S1. Dataset - Not tested. Table S2. Dataset - PGS1 (exclusion). Table S3. Dataset - PGS2 (ranking). Table S4. Dataset - PGS3 (ideal). Table S5. Population characteristics and diagnostic accuracy measures stratified for maternal age. Table S6. Effect of testing summary. Table S7. Logistic regression - PGS1. Table S8. Logistic regression - PGS2. Table S9. Logistic regression - PGS3. Table S10. Effect of testing - first transfer attempt. Table S11. Costing summary. Table S12. Cost-effectiveness analysis - PGS1 vs not testing - PGS £2,965. Table S13. Cost-effectiveness analysis - PGS1 vs not testing - PGS £1,195 (overall cost parity). Table S14. Cost-effective analysis - PGS2 vs not testing - PGS £2,965. Table S15. Cost-effective analysis - PGS2 vs not testing - PGS £598 (overall cost parity). Table S16. Cost-effective analysis - PGS3 vs not testing - PGS £2,965. Table S17. Cost-effective analysis - PGS3 vs not testing - PGS £2,496 (overall cost parity). Table S18. Cost-effectiveness analysis - PGS1 vs not testing - PGS £2,965, 2 or more embryos. Table S19. HFEA UK data collection for 16 clinics with PGS activity the period July 2011 to June 2014. (XLSX 2.77 mb) [file 12958_2017_269_MOESM1_ESM.xlsx]

## Sheet: Contents
Sheet	Supplementary Tables
1	Dataset - Not tested
2	Dataset - PGS1 (exclusion)
3	Dataset - PGS2 (ranking)
4	Dataset - PGS3 (ideal)
5	Population characteristics and diagnostic accuracy measures stratified for maternal age
6	Effect of testing summary
7	Logistic regression - PGS1
8	Logistic regression - PGS2
9	Logistic regression - PGS3
10	Effect of testing - first transfer attempt
11	Costing summary
12	Cost-effectiveness analysis - PGS1 vs not testing - PGS £2,965
13	Cost-effectiveness analysis - PGS1 vs not testing - PGS £1,195 (overall cost parity)
14	Cost-effective analysis - PGS2 vs not testing - PGS £2,965
15	Cost-effective analysis - PGS2 vs not testing - PGS £598 (overall cost parity)
16	Cost-effective analysis - PGS3 vs not testing - PGS £2,965
17	Cost-effective analysis - PGS3 vs not testing - PGS £2,496 (overall cost parity)
18	Cost-effectiveness analysis - PGS1 vs not testing - PGS £2,965, 2 or more embryos
19	HFEA UK data collection for 16 clinics with PGS activity the period July 2011 to June 2014

## Sheet: 1 Not tested
							Attempt 1				596		Attempt 2				362			Attempt 3				199		Attempt 4				102		Attempt 5				48	Attempt 6				25	Attempt 7				13	Attempt 8
	Normal test result			Abnormal test result			870	27	244		593			14	170		355				6	121		197			8	59		100			0	26		48		0	14		25		1	6		13		0	7
ID	Age (y)	Insemination	Embryos (n)	Euploid (n)	Aneuploid (n)	Transfer order	Pregnant	Miscarriage	Live birth	Multiple	Thaw1	Thaw1a	Pregnant	Miscarriage	Live birth	Multiple	Thaw2	Thaw2b	Thaw2c	Pregnant	Miscarriage	Live birth	Multiple	Thaw3	Thaw3b	Pregnant	Miscarriage	Live birth	Multiple	Thaw4	Thaw4b	Pregnant	Miscarriage	Live birth	Multiple	Thaw5	Pregnant	Miscarriage	Live birth	Multiple	Thaw6	Pregnant	Miscarriage	Live birth	Multiple	Thaw7	Pregnant	Miscarriage	Live birth
1	<35	ICSI	0	0	0
2	<35	ICSI	7	5	2	E,E,A,A,E,E,E	1	0	1	0
3	<35	ICSI	6	3	3	A,E,E,A,E,A	0				1		0				1			0				1		0				1		0				1	0
4	<35	IVF	4	3	1	E,E,E,A	1	0	1	0
5	<35	ICSI	2	1	1	A,E	0				1		0
6	35-37	IVF	2	1	1	E,A	0	0	0		1		0
7	<35	ICSI	0	0	0
8	<35	ICSI	4	2	2	E,A,E,A	0				1		0				1			1	0	1	0
9	<35	IVF	12	6	6	E,E,A,E,A,A,E,A,E,A,E,A	1	0	1	0
10	35-37	IVF	0	0	0
11	38-39	ICSI	4	3	1	E,E,E,A	0	0	0		1		0				1			0				1		1	0	1	0
12	38-39	ICSI	0	0	0
13	<35	IVF	2	2	0	E,E	0				1		1	0	1	0
14	<35	IVF	1	0	1	A	0
15	<35	ICSI	5	4	1	E,E,A,E,E	1	0	1	0
16	<35	ICSI	7	3	4	E,A,E,E,A,A,A	1	0	1	0
17	<35	IVF	4	3	1	E,E,E,A	0				1		0				1			1	0	1	0
18	38-39	ICSI	5	1	4	E,A,A,A,A	0	0	0		1		0				1			0				1		0				1		0
19	35-37	ICSI	1	0	1	A	1	0	1	0
20	<35	ICSI	2	2	0	E,E	1	0	1	0
21	<35	ICSI	4	4	0	E,E,E,E	1	0	1	0
22	<35	ICSI	5	2	3	E,A,A,E,A	0				1		0				0	0	1	0
23	<35	IVF	4	3	1	E,E,E,A	0				1		0				1			0				1		0
24	38-39	Aban	0	0	0
25	<35	IVF	8	5	3	A,E,E,E,A,E,E,A	1	0	1	0
26	<35	IVF	0	0	0
27	<35	ICSI	0	0	0
28	<35	ICSI	5	3	2	A,A,E,E,E	0				1		0				1			0				1		0				1		0
29	35-37	Aban	0	0	0
30	35-37	IVF	4	2	2	A,E,E,A	0	0	0		1		1	0	1	0
31	<35	ICSI	7	7	0	E,E,E,E,E,E,E	1	0	1	0
32	<35	IVF	1	1	0	E	0
33	<35	IVF	12	8	4	E,E,E,A,A,A,E,E,E,E,E,A	0				1		0				1			1	0	1	0
34	<35	ICSI	12	3	9	A,A,A,E,A,A,A,E,A,E,A,A	0				1		0				1			1	1	0		1		1	1	0		1		0				1	0				1	0				1	1	0	1
35	<35	ICSI	2	1	1	E,A	1	0	1	0
36	38-39	Aban	0	0	0
37	<35	ICSI	3	2	1	A,E,E	0				1		1	0	1	0
38	<35	ICSI	7	4	3	E,A,A,E,E,E,A	1	0	1	0
39	<35	ICSI	6	4	2	E,A,E,E,A,E	1	0	1	0
40	<35	ICSI	5	5	0	E,E,E,E,E	1	0	1	0
41	38-39	ICSI	2	1	1	E,A	1	0	1	0
42	<35	IVF	5	5	0	E,E,E,E,E	0				1		0				1			0				1		0				1		1	0	1	0
43	38-39	ICSI	2	1	1	A,E	0	0	0		1		1	0	1	0
44	<35	IVF	2	2	0	E,E	0				1		0
45	35-37	IVF	5	3	2	A,A,E,E,E	0	0	0		1		0				1			1	0	1	0
46	35-37	ICSI	3	3	0	E,E,E	0	0	0		1		0				1			0
47	<35	ICSI	3	2	1	E,E,A	0				1		1	0	1	0
48	<35	IVF	0	0	0
49	<35	ICSI	6	4	2	E,E,A,A,E,E	0				1		0				1			1	0	1	0
50	<35	IVF	6	6	0	E,E,E,E,E,E	1	0	1	0
51	<35	ICSI	9	9	0	E,E,E,E,E,E,E,E,E	0				1		0				1			1	0	1	0
52	<35	ICSI	11	8	3	E,E,A,E,E,A,E,A,E,E,E	1	0	1	0
53	<35	ICSI	8	3	5	E,A,A,A,E,A,A,E	0				1		0				1			0				1		0				1		1	0	1	0
54	<35	ICSI	6	4	2	A,E,E,E,E,A	0				1		1	0	1	0
55	<35	ICSI	5	4	1	E,E,E,A,E	1	0	1	0
56	<35	ICSI	4	4	0	E,E,E,E	1	0	1	0
57	<35	ICSI	9	5	4	E,A,A,E,E,E,A,E,A	1	0	1	0
58	35-37	ICSI	0	0	0
59	<35	IVF	5	4	1	E,E,E,A,E	0				1		0				1			0				1		0				1		0
60	<35	IVF	7	5	2	E,A,E,A,E,E,E	0				1		0				1			0				1		0				1		0				1	0				1	0
61	<35	ICSI	4	4	0	E,E,E,E	1	0	1	0
62	<35	ICSI	7	5	2	A,E,E,A,E,E,E	0				1		0				1			1	0	1	0
63	38-39	ICSI	2	2	0	E,E	0	0	0		1		0
64	38-39	IVF	1	0	1	A	0	0	0
65	35-37	IVF	7	4	3	E,A,A,E,A,A,E	1	0	1	0
66	<35	ICSI	3	3	0	E,E,E	1	0	1	0
67	<35	ICSI	4	4	0	E,E,E,E	1	0	1	0
68	<35	ICSI	8	6	2	E,E,A,E,E,E,E,A	1	0	1	0
69	<35	ICSI	6	3	3	E,E,A,E,A,A	0				1		1	0	1	0
70	<35	ICSI	6	5	1	E,E,E,A,E,E	0				1		1	0	1	0
71	38-39	IVF	3	3	0	E,E,E	0	0	0		1		0				1			0
72	<35	ICSI	5	3	2	A,A,E,E,E	0				1		0				1			0				1		1	0	1	0
73	<35	IVF	9	8	1	E,A,E,E,E,E,E,E,E	0				1		0				1			0				1		0				1		0				1	0				1	1	0	1	0
74	38-39	ICSI	1	1	0	E	0	0	0
75	<35	ICSI	9	5	4	E,A,A,E,E,A,E,E,A	1	0	1	0
76	<35	IVF	3	2	1	E,E,A	0				1		0				0
77	38-39	IVF	4	3	1	E,A,E,E	0	0	0		1		0				1			1	0	1	0
78	35-37	IVF	6	5	1	E,E,E,E,E,A	1	0	1	0
79	35-37	ICSI	3	1	2	E,A,A	1	0	1	0
80	35-37	ICSI	5	5	0	E,E,E,E,E	0	0	0		1		1	0	1	0
81	<35	IVF	0	0	0
82	<35	ICSI	7	5	2	E,A,E,A,E,E,E	1	0	1	0
83	<35	IVF	6	6	0	E,E,E,E,E,E	1	0	1	0
84	38-39	ICSI	4	1	3	E,A,A,A	1	0	1	0
85	<35	ICSI	5	4	1	E,E,A,E,E	1	0	1	0
86	<35	ICSI	7	2	5	A,A,E,A,A,A,E	0				1		0				1			0				1		0				1		0				1	0				1	0
87	<35	IVF	7	5	2	E,A,E,E,E,E,A	0				1		0				1			1	0	1	0
88	35-37	ICSI	1	1	0	E	0	0	0
89	35-37	ICSI	10	7	3	A,E,E,E,E,E,E,E,A,A	1	0	1	0	1
90	35-37	ICSI	4	3	1	A,E,E,E	0	0	0		1		1	1	0		1			1	0	1	0
91	<35	ICSI	8	6	2	E,E,E,E,E,A,E,A	1	0	1	0
92	<35	IVF	4	3	1	A,E,E,E	1	1	0		0	1	0				1			0
93	35-37	IVF	4	4	0	E,E,E,E	1	0	1	0
94	<35	IVF	9	4	5	A,A,A,E,A,E,E,E,A	0				1		0				1			0				1		0				1		0				1	1	0	1	0
95	35-37	ICSI	3	2	1	A,E,E	0	0	0		1		0				1			0
96	35-37	ICSI	0	0	0
97	35-37	IVF	4	3	1	E,E,E,A	1	0	1	0
98	<35	IVF	8	6	2	E,E,E,E,E,E,A,A	1	0	1	0
99	38-39	ICSI	5	2	3	E,A,A,E,A	0	0	0		1		0				1			1	1	0		1		0				0
100	35-37	ICSI	4	2	2	A,E,E,A	0	0	0		1		0				1			0				1		0
101	35-37	ICSI	4	2	2	E,E,A,A	0	0	0		1		1	0	1	0
102	<35	ICSI	5	4	1	E,A,E,E,E	0				1		1	1	0		1			0				1		1	0	1	0
103	35-37	IVF	2	1	1	A,E	0	0	0		1		1	0	1	0
104	<35	ICSI	5	4	1	E,E,E,E,A	0				1		0				1			1	0	1	0
105	35-37	IVF	2	1	1	A,E	0	0	0		1		1	0	1	0
106	35-37	IVF	2	1	1	A,E	0	0	0		1		1	0	1	0
107	<35	ICSI	6	2	4	A,E,A,A,E,A	1	0	1	0
108	<35	ICSI	4	3	1	E,E,A,E	1	0	1	0
109	35-37	ICSI	2	0	2	A,A	0	0	0		1		0
110	35-37	ICSI	5	4	1	E,A,E,E,E	0	0	0		1		0				1			0				1		0				1		1	0	1	0
111	<35	IVF	6	5	1	E,E,E,E,A,E	1	0	1	0
112	38-39	IVF	4	1	3	E,A,A,A	1	0	1	0
113	<35	ICSI	1	1	0	E	1	0	1	0
114	<35	ICSI	5	4	1	E,E,A,E,E	0				1		0				1			0				1		1	1	0		1		1	0	1	0
115	<35	Aban	0	0	0
116	35-37	ICSI	3	2	1	A,E,E	0	0	0		1		0				1			0
117	<35	ICSI	4	3	1	E,E,E,A	1	0	1	0
118	<35	ICSI	3	2	1	E,A,E	0				1		0				1			1	0	1	0
119	35-37	ICSI	2	1	1	A,E	0	0	0		1		1	0	1	0
120	<35	ICSI	8	5	3	E,A,E,A,A,E,E,E	0				1		0				1			0				1		1	0	1	0
121	35-37	ICSI	4	3	1	E,E,A,E	1	0	1	0
122	<35	IVF	9	7	2	E,A,E,E,E,E,A,E,E	1	0	1	1
123	<35	ICSI	5	2	3	E,A,E,A,A	1	0	1	0
124	<35	IVF	5	3	2	E,E,E,A,A	1	1	0		1		0				1			1	0	1	0
125	<35	ICSI	5	4	1	E,A,E,E,E	0				1		0				1			0				1		1	0	1	0
126	<35	ICSI	9	7	2	E,E,E,E,E,A,E,E,A	1	0	1	0
127	35-37	ICSI	2	2	0	E,E	0	0	0		1		0
128	<35	IVF	5	4	1	E,E,E,A,E	1	0	1	0
129	35-37	ICSI	2	2	0	E,E	1	0	1	0
130	<35	ICSI	3	2	1	A,E,E	1	0	1	0
131	<35	ICSI	4	3	1	E,E,E,A	1	0	1	0
132	38-39	IVF	2	0	2	A,A	0	0	0		1		0
133	38-39	ICSI	0	0	0
134	<35	IVF	7	5	2	E,E,E,A,E,A,E	0				1		1	0	1	0
135	35-37	ICSI	3	2	1	E,E,A	1	0	1	0
136	35-37	IVF	3	2	1	E,A,E	1	0	1	0
137	<35	ICSI	4	2	2	A,E,E,A	0				1		1	0	1	0
138	<35	ICSI	8	6	2	E,A,A,E,E,E,E,E	0				1		0				1			0				0		0				1		1	0	1	0
139	<35	IVF	0	0	0
140	<35	ICSI	5	4	1	E,E,E,A,E	1	0	1	0
141	35-37	IVF	14	10	4	A,A,E,E,A,E,A,E,E,E,E,E,E,E	0	0	0		1		0				1			1	0	1	0
142	<35	ICSI	6	4	2	E,A,E,A,E,E	0				1		0				1			0				1		0				1		1	0	1	0
143	35-37	IVF	8	4	4	A,A,E,A,E,A,E,E	0	0	0		1		0				1			0				1		0				1		0				1	0				1	1	0	1	0
144	35-37	ICSI	0	0	0
145	<35	ICSI	0	0	0
146	35-37	IVF	10	7	3	E,E,A,A,E,E,E,E,E,A	0	0	0		1		1	0	1	0
147	35-37	ICSI	2	2	0	E,E	0	0	0		1		0
148	<35	IVF	3	2	1	E,E,A	0				1		1	0	1	0
149	<35	ICSI	4	3	1	E,E,A,E	0				1		0				1			0				1		0
150	38-39	ICSI	4	3	1	A,E,E,E	0	0	0		1		0				1			0				1		0
151	<35	IVF	3	2	1	A,E,E	0				1		0				0
152	38-39	IVF	5	3	2	E,E,A,E,A	0	0	0		1		1	0	1	0
153	<35	ICSI	0	0	0
154	<35	ICSI	3	2	1	E,E,A	1	0	1	0
155	35-37	ICSI	2	1	1	A,E	0	0	0		1		1	0	1	0
156	35-37	IVF	4	2	2	A,E,E,A	0	0	0		1		1	0	1	0
157	<35	IVF	5	5	0	E,E,E,E,E	1	0	1	0
158	38-39	ICSI	4	3	1	E,E,A,E	0	0	0		1		0				1			0				0
159	<35	IVF	4	3	1	A,E,E,E	0				1		1	0	1	0
160	35-37	ICSI	3	2	1	E,A,E	0	0	0		1		0				1			0
161	<35	ICSI	7	5	2	E,E,A,E,E,A,E	1	0	1	0
162	38-39	ICSI	7	3	4	E,A,A,E,A,A,E	0	0	0		1		0				1			0				1		1	1	0		0	1	0				1	0
163	<35	IVF	6	5	1	E,E,E,E,E,A	0				1		0				1			0				1		0				1		0				1	0
164	<35	ICSI	2	2	0	E,E	0				1		0
165	<35	ICSI	6	3	3	E,A,E,E,A,A	0				0	1	0				1			0				1		0				1		0				1	0
166	<35	ICSI	0	0	0
167	<35	IVF	4	3	1	E,E,A,E	1	0	1	0
168	35-37	IVF	4	3	1	E,E,A,E	0	0	0		1		0				1			0				1		0
169	<35	ICSI	4	2	2	A,A,E,E	0				1		0				1			0				1		0
170	38-39	ICSI	5	0	5	A,A,A,A,A	0	0	0		1		0				1			0				1		1	1	0		1		0
171	<35	ICSI	9	4	5	A,A,E,A,A,E,E,A,E	0				1		0				1			0				1		0				1		0				1	0				1	1	0	1	0
172	<35	ICSI	5	3	2	A,E,E,A,E	0				1		0				1			1	0	1	0
173	38-39	ICSI	0	0	0
174	<35	ICSI	3	1	2	A,E,A	0				1		0				1			0
175	<35	ICSI	0	0	0
176	35-37	IVF	3	2	1	E,E,A	0	0	0		1		1	0	1	0
177	<35	IVF	4	4	0	E,E,E,E	0				1		1	0	1	0
178	35-37	IVF	4	2	2	E,E,A,A	0	0	0		1		0				1			1	0	1	0
179	35-37	IVF	2	2	0	E,E	1	0	1	0
180	38-39	ICSI	7	4	3	E,E,A,A,A,E,E	0	0	0		1		0				1			0				1		0				1		0				1	1	0	1	0
181	<35	IVF	2	2	0	E,E	1	0	1	0
182	<35	ICSI	5	4	1	A,E,E,E,E	0				1		0				1			1	0	1	0
183	<35	IVF	5	3	2	A,A,E,E,E	0				1		0				1			1	0	1	0
184	35-37	ICSI	0	0	0
185	35-37	ICSI	3	2	1	E,E,A	1	0	1	0
186	<35	IVF	7	6	1	E,E,E,E,E,A,E	0				1		1	0	1	0
187	<35	ICSI	2	2	0	E,E	0				1		0
188	<35	IVF	4	2	2	E,A,E,A	0				1		1	0	1	0
189	<35	IVF	1	0	1	A	0
190	38-39	ICSI	0	0	0
191	35-37	ICSI	5	3	2	A,E,E,E,A	0	0	0		1		0				1			1	0	1	0
192	35-37	ICSI	5	4	1	E,E,A,E,A	0	0	0		1		1	0	1	0
193	38-39	IVF	2	1	1	A,E	0	0	0		1		0
194	<35	ICSI	9	7	2	A,E,E,E,E,E,A,E,E	0				0	1	0				1			0				1		1	0	1	0
195	<35	IVF	8	4	4	E,A,E,A,A,A,E,A	1	0	1	0
196	<35	IVF	0	0	0
197	<35	IVF	10	9	1	A,E,E,E,E,E,E,E,E,E	0				1		1	0	1	0
198	<35	IVF	8	7	1	E,E,E,A,E,E,E,E	0				1		1	0	1	0
199	<35	ICSI	11	5	6	A,E,A,A,E,E,A,E,A,E,A	0				1		0				1			0				1		0				1		0				1	0				1	0				1	1	0	1
200	35-37	ICSI	3	3	0	E,E,E	0	0	0		1		1	0	1	0
201	<35	ICSI	2	1	1	A,E	0				1		0
202	<35	ICSI	10	7	3	A,E,E,E,A,A,E,E,E,E	0				1		1	0	1	0
203	<35	ICSI	7	6	1	E,E,E,A,E,E,E	0				1		1	0	1	0
204	<35	ICSI	14	7	7	A,E,A,E,A,A,A,A,E,E,E,E,E,A	0				1		0				1			0				1		1	0	1	0
205	<35	ICSI	0	0	0
206	<35	ICSI	11	5	6	A,A,E,E,E,A,A,E,A,A,E	0				1		0				1			1	0	1	0
207	<35	ICSI	5	1	4	A,A,A,E,A	0				1		0				1			0				1		1	0	1	0
208	<35	IVF	7	6	1	E,E,E,E,E,A,E	1	0	1	0
209	35-37	IVF	4	2	2	E,A,A,E	1	0	1	0
210	35-37	ICSI	3	1	2	E,A,A	0	0	0		1		0				1			0
211	<35	IVF	5	4	1	A,E,E,E,E	0				1		0				1			0				1		0				1		0
212	35-37	IVF	8	5	3	A,E,E,E,E,E,A,A	0	0	0		1		0				1			1	0	1	0
213	<35	ICSI	0	0	0
214	<35	IVF	5	4	1	E,E,E,E,A	0				1		0				1			0				1		1	0	1	0
215	<35	IVF	9	5	4	A,E,E,A,A,E,E,A,E	0				1		1	0	1	1
216	<35	ICSI	12	9	3	E,E,A,E,E,A,E,E,E,E,A,E	1	0	1	0
217	35-37	ICSI	7	5	2	E,E,A,E,E,E,A	0	0	0		1		1	0	1	0
218	<35	ICSI	10	9	1	E,E,E,E,A,E,E,E,E,E	0				1		0				1			0				1		0				1		0				1	1	0	1	1
219	<35	IVF	11	5	6	A,A,E,E,E,E,A,E,A,A,A	0				1		0				1			1	0	1	0
220	35-37	IVF	11	8	3	A,A,E,E,A,E,E,E,E,E,E	0	0	0		1		0				1			1	0	1	0
221	38-39	ICSI	3	1	2	A,E,A	0	0	0		1		1	0	1	0	1			0
222	38-39	ICSI	1	0	1	A	0	0	0
223	<35	ICSI	5	4	1	E,E,E,A,E	1	1	0		1		0				1			1	0	1	0
224	<35	ICSI	0	0	0
225	35-37	ICSI	8	2	6	E,A,A,E,A,A,A,A	0	0	0		1		0				1			0				1		1	0	1	0
226	38-39	ICSI	4	3	1	A,E,E,E	0	0	0		1		0				1			0				1		1	0	1	0
227	35-37	ICSI	3	2	1	E,E,A	0	0	0		1		1	0	1	0
228	<35	ICSI	5	3	2	A,A,E,E,E	0				1		0				1			0				1		0				1		0
229	<35	ICSI	7	5	2	A,E,E,E,A,E,E	0				0	1	0				1			1	0	1	0
230	38-39	IVF	6	3	3	A,A,E,E,E,A	0	0	0		0	1	0				1			0				1		1	0	1	0
231	<35	ICSI	8	6	2	E,E,A,E,A,E,E,E	0				1		1	0	1	0
232	<35	ICSI	10	7	3	E,A,E,A,A,E,E,E,E,E	0				1		0				1			1	0	1	0
233	<35	IVF	9	7	2	A,E,A,E,E,E,E,E,E	0				1		0				1			0				1		0				1		0				1	0				1	0				1	1	0	1
234	<35	ICSI	2	2	0	E,E	0				1		0
235	<35	IVF	5	5	0	E,E,E,E,E	1	0	1	0
236	<35	ICSI	5	3	2	E,E,E,A,A	0				1		1	0	1	0
237	<35	IVF	5	3	2	E,A,E,E,A	1	0	1	0
238	<35	ICSI	5	4	1	E,A,E,E,E	0				1		0				1			0				1		0				1		1	0	1	0
239	35-37	IVF	5	3	2	A,E,A,E,E	0	0	0		1		1	0	1	0
240	35-37	IVF	2	2	0	E,E	0	0	0		1		0
241	<35	ICSI	7	6	1	E,E,E,E,A,E,E	1	0	1	0
242	38-39	IVF	6	4	2	A,E,E,A,E,E	0	0	0		1		1	0	1	0
243	<35	IVF	5	5	0	E,E,E,E,E	1	0	1	0
244	<35	ICSI	4	3	1	A,E,E,E	0				1		0				0	1		0
245	<35	IVF	0	0	0
246	<35	IVF	2	2	0	E,E	0				1		0
247	35-37	ICSI	6	3	3	E,A,A,A,E,E	1	0	1	0
248	<35	IVF	6	4	2	A,E,E,E,E,A	0				1		0				1			1	0	1	0
249	<35	ICSI	4	3	1	E,A,E,E	0				1		0				0	1		1	0	1	0
250	35-37	ICSI	2	2	0	E,E	1	0	1	0
251	38-39	IVF	3	1	2	A,A,E	0	0	0		1		0				1			0
252	38-39	ICSI	0	0	0
253	35-37	ICSI	2	2	0	E,E	1	1	0		1		1	0	1	0
254	<35	ICSI	2	2	0	E,E	0				1		1	0	1	0
255	<35	ICSI	5	4	1	E,E,A,E,E	0				1		0				1			0				1		0				1		0
256	<35	ICSI	4	1	3	A,A,E,A	0				1		0				1			1	0	1	0
257	<35	ICSI	4	3	1	E,A,E,E	0				1		1	1	0		1			0				1		0
258	35-37	IVF	4	3	1	A,E,E,E	0	0	0		1		0				1			1	0	1	0
259	<35	IVF	4	4	0	E,E,E,E	1	0	1	0
260	<35	ICSI	0	0	0
261	38-39	IVF	5	3	2	E,A,E,A,E	1	0	1	0
262	<35	ICSI	6	6	0	E,E,E,E,E,E	0				1		1	0	1	0
263	<35	IVF	3	2	1	A,E,E	0				1		1	1	0		1			0
264	<35	IVF	11	8	3	E,E,A,E,A,E,E,E,E,A,E	0				1		0				1			0				1		1	0	1	0
265	<35	ICSI	4	4	0	E,E,E,E	1	0	1	0
266	35-37	ICSI	1	1	0	E	0	0	0
267	<35	IVF	11	6	5	E,E,A,A,E,A,E,E,A,A,E	1	0	1	0
268	<35	ICSI	5	3	2	A,E,E,E,A	0				1		1	0	1	0
269	<35	ICSI	4	2	2	E,E,A,A	0				1		1	0	1	1
270	38-39	ICSI	7	3	4	A,E,E,E,A,A,A	0	0	0		1		0				1			1	0	1	0
271	35-37	IVF	4	4	0	E,E,E,E	0	0	0		1		0				1			1	0	1	0
272	<35	ICSI	4	1	3	A,E,A,A	0				1		1	0	1	0
273	<35	ICSI	0	0	0
274	<35	ICSI	0	0	0
275	<35	IVF	7	6	1	A,E,E,E,E,E,E	0				1		0				1			0				1		0				1		1	0	1	0
276	<35	ICSI	9	7	2	E,A,E,E,E,E,A,E,E	0				1		0				1			0				1		0				1		1	0	1	0
277	35-37	ICSI	6	3	3	E,E,E,A,A,A	0	0	0		1		1	0	1	0
278	35-37	IVF	3	1	2	A,E,A	0	0	0		1		1	0	1	0
279	<35	ICSI	4	3	1	E,E,E,A	1	0	1	0
280	<35	Aban	0	0	0
281	<35	ICSI	7	6	1	A,E,E,E,E,E,E	0				1		1	0	1	0
282	<35	ICSI	7	5	2	E,E,E,A,A,E,E	1	1	0		1		1	0	1	0
283	<35	ICSI	9	3	6	E,A,A,A,A,E,E,A,A	1	1	0		1		1	0	1	0
284	<35	ICSI	8	8	0	E,E,E,E,E,E,E,E	0				1		0				1			0				1		0				1		0				1	0				1	0				1	1	0	1
285	<35	ICSI	2	1	1	A,E	0				1		1	0	1	0
286	38-39	ICSI	1	0	1	A	0	0	0
287	<35	IVF	9	7	2	E,A,E,E,E,E,E,A,E	1	0	1	0
288	38-39	ICSI	12	2	10	A,A,A,A,A,A,E,E,A,A,A,A	1	1	0		1		0				1			0				1		1	1	0		0	1	0				1	1	0	1	0
289	<35	ICSI	8	3	5	A,A,E,A,E,A,A,E	0				1		0				1			0				1		0				1		1	0	1	0
290	35-37	ICSI	2	1	1	A,E	0	0	0		1		0
291	38-39	ICSI	1	1	0	E	1	0	1	0
292	<35	ICSI	5	3	2	E,A,E,A,E	0				1		0				1			0				1		0				1		0
293	35-37	ICSI	7	6	1	A,E,E,E,E,E,E	0	0	0		1		0				1			0				1		0				1		0				1	0				1	0
294	35-37	IVF	3	1	2	A,A,E	0	0	0		1		0				1			0
295	35-37	IVF	4	3	1	E,E,A,E	0	0	0		1		0				1			0				1		0
296	35-37	ICSI	0	0	0
297	<35	ICSI	8	6	2	E,E,E,A,E,E,A,E	1	0	1	0
298	<35	ICSI	4	2	2	E,E,A,A	0				1		0				1			0				1		0
299	<35	IVF	5	5	0	E,E,E,E,E	0				1		0				1			0				1		0				1		1	0	1	0
300	38-39	ICSI	4	2	2	E,A,E,A	1	0	1	0
301	35-37	ICSI	10	8	2	E,E,E,E,E,A,E,A,E,E	0	0	0		0	1	0				0	1		0				1		1	0	1	0
302	<35	Aban	0	0	0
303	<35	IVF	0	0	0
304	<35	ICSI	5	4	1	E,E,E,A,E	1	0	1	0
305	35-37	ICSI	3	3	0	E,E,E	1	0	1	0
306	<35	ICSI	4	3	1	A,E,E,E	0				1		0				1			1	0	1	0
307	<35	ICSI	2	1	1	A,E	0				1		1	0	1	0
308	<35	ICSI	3	2	1	E,A,E	1	0	1	0
309	35-37	ICSI	5	1	4	A,A,A,E,A	0	0	0		1		0				1			0				1		0				1		0
310	38-39	ICSI	4	3	1	E,E,E,A	0	0	0		0	1	0				1			0
311	<35	IVF	3	1	2	A,A,E	0				1		0				1			1	0	1	0
312	<35	ICSI	0	0	0
313	<35	ICSI	3	3	0	E,E,E	0				1		1	0	1	0
314	35-37	ICSI	2	1	1	E,A	0	0	0		1		0
315	<35	ICSI	4	4	0	E,E,E,E	0				1		0				1			0				1		0
316	35-37	ICSI	8	5	3	E,E,A,A,E,A,E,E	0	0	0		1		0				1			0				1		0				1		1	0	1	0
317	<35	ICSI	7	7	0	E,E,E,E,E,E,E	1	0	1	0
318	<35	IVF	9	7	2	E,E,A,E,A,E,E,E,E	0				1		0				1			0				1		0				1		0				1	0				1	1	0	1	0
319	<35	ICSI	9	7	2	E,E,E,E,E,A,A,E,E	0				1		0				0	1		0				1		0				1		0				1	0				1	0				1	1	0	1
320	<35	ICSI	11	7	4	E,E,E,A,A,E,A,E,E,A,E	0				1		0				1			1	0	1	0
321	<35	ICSI	11	7	4	E,E,E,A,E,E,A,A,A,E,E	1	0	1	0
322	<35	Aban	0	0	0
323	<35	ICSI	3	2	1	E,E,A	1	0	1	0
324	<35	IVF	5	4	1	E,E,E,A,E	0				1		0				1			0				1		0				1		0
325	<35	IVF	2	2	0	E,E	1	0	1	0
326	<35	IVF	3	1	2	E,A,A	0				1		0				1			0
327	<35	ICSI	4	2	2	A,E,E,A	0				1		0				1			0				1		0
328	38-39	Aban	0	0	0
329	<35	ICSI	7	4	3	A,E,A,E,A,E,E	0				0	1	0				1			0				0	1	0				1		1	0	1	0
330	<35	IVF	0	0	0
331	35-37	ICSI	3	2	1	A,E,E	0	0	0		1		0				1			0
332	35-37	ICSI	6	4	2	E,E,A,E,E,A	0	0	0		1		0				1			0				1		1	0	1	0
333	<35	IVF	8	7	1	E,E,E,E,E,A,E,E	0				1		1	0	1	0
334	<35	ICSI	2	1	1	E,A	1	0	1	0
335	<35	IVF	4	3	1	E,E,A,E	0				1		0				1			0				1		0
336	<35	ICSI	9	5	4	A,E,E,A,A,E,E,A,E	0				1		0				1			1	0	1	0
337	<35	ICSI	4	1	3	A,E,A,A	0				1		0				1			0				1		0
338	<35	ICSI	5	4	1	E,E,E,A,E	1	0	1	0
339	<35	ICSI	11	8	3	E,E,A,E,E,A,A,E,E,E,E	0				0	1	0				1			0				1		0				1		0				1	0				1	0				1	1	0	1
340	<35	ICSI	6	1	5	E,A,A,A,A,A	1	0	1	0
341	38-39	IVF	2	0	2	A,A	0	0	0		1		0
342	<35	ICSI	0	0	0
343	<35	IVF	0	0	0
344	35-37	ICSI	5	3	2	A,E,E,E,A	0	0	0		0	1	0				1			0				1		0
345	<35	ICSI	9	4	5	E,E,E,A,A,A,E,A,A	0				1		1	0	1	0
346	38-39	IVF	7	5	2	E,E,E,E,A,A,E	1	0	1	0
347	<35	ICSI	9	6	3	E,E,A,E,A,A,E,E,A	0				1		0				1			0				1		0				1		0				1	0				1	1	0	1	0
348	<35	ICSI	5	4	1	E,E,E,A,E	0				1		1	0	1	0
349	35-37	ICSI	0	0	0
350	<35	ICSI	0	0	0
351	<35	Aban	0	0	0
352	35-37	ICSI	2	2	0	E,E	1	0	1	0
353	<35	ICSI	0	0	0
354	38-39	ICSI	1	1	0	E	0	0	0
355	35-37	ICSI	0	0	0
356	<35	ICSI	4	3	1	A,E,E,E	0				1		0				1			0				1		1	0	1	0
357	38-39	IVF	8	7	1	E,E,E,E,E,E,E,A	0	0	0		1		0				1			0				1		1	0	1	0
358	35-37	IVF	4	1	3	A,A,A,E	0	0	0		1		0				0	1		0
359	35-37	ICSI	0	0	0
360	<35	ICSI	4	2	2	A,A,E,E	0				1		0				1			1	0	1	0
361	<35	ICSI	4	2	2	E,A,E,A	0				1		0				1			0				1		0
362	<35	ICSI	4	4	0	E,E,E,E	0				1		0				1			0				1		1	0	1	0
363	<35	IVF	4	3	1	E,A,E,E	0				1		0				1			0				1		0
364	<35	ICSI	7	6	1	E,E,E,A,E,E,E	0				1		0				1			0				1		1	0	1	0
365	35-37	ICSI	0	0	0
366	<35	ICSI	0	0	0
367	38-39	ICSI	7	4	3	E,E,A,A,A,E,E	0	0	0		1		1	0	1	0
368	<35	IVF	6	5	1	A,E,E,E,E,E	0				1		1	0	1	0
369	<35	ICSI	2	1	1	A,E	0				1		0
370	<35	ICSI	6	3	3	A,E,A,A,E,E	0				1		1	0	1	0
371	<35	IVF	5	3	2	E,E,A,A,E	1	0	1	0
372	<35	ICSI	3	1	2	E,A,A	0				1		0				0
373	38-39	ICSI	7	3	4	A,A,A,A,E,E,E	0	0	0		1		0				1			0				1		0				1		0				1	0				1	0
374	<35	ICSI	5	5	0	E,E,E,E,E	1	0	1	0
375	35-37	ICSI	2	1	1	A,E	0	0	0		1		0
376	<35	IVF	3	3	0	E,E,E	1	0	1	0
377	<35	IVF	1	0	1	A	0
378	<35	IVF	2	1	1	E,A	1	0	1	0
379	<35	ICSI	3	1	2	A,A,E	0				1		0				1			1	0	1	0
380	38-39	IVF	2	0	2	A,A	0	0	0		1		0
381	<35	ICSI	7	3	4	E,E,A,A,E,A,A	0				1		1	0	1	0
382	<35	IVF	4	4	0	E,E,E,E	0				1		0				1			1	0	1	0
383	35-37	IVF	1	1	0	E	0	0	0
384	35-37	IVF	4	2	2	A,E,E,A	0	0	0		1		0				1			1	0	1	0
385	<35	ICSI	6	5	1	E,E,E,A,E,E	1	0	1	0
386	<35	IVF	0	0	0
387	<35	IVF	4	2	2	E,E,A,A	0				0	1	0				1			0
388	<35	ICSI	0	0	0
389	35-37	ICSI	14	10	4	E,E,E,E,E,A,A,A,E,E,E,E,A,E	1	1	0		1		0				1			1	0	1	0
390	<35	ICSI	3	2	1	E,A,E	1	0	1	0
391	<35	ICSI	5	3	2	E,A,A,E,E	1	0	1	0
392	<35	ICSI	9	5	4	E,E,A,E,A,A,E,A,E	0				1		0				1			0				1		1	0	1	0
393	<35	ICSI	3	2	1	A,E,E	0				1		0				1			1	0	1	0
394	<35	ICSI	5	5	0	E,E,E,E,E	0				1		0				1			1	0	1	1
395	<35	ICSI	9	7	2	E,E,E,E,E,A,A,E,E	1	1	0		1		1	0	1	0
396	<35	ICSI	5	5	0	E,E,E,E,E	1	0	1	0
397	<35	IVF	7	5	2	A,A,E,E,E,E,E	0				1		0				1			1	0	1	0
398	<35	ICSI	5	3	2	E,E,A,E,A	1	0	1	0
399	<35	ICSI	8	5	3	A,A,E,E,A,E,E,E	0				1		0				1			0				1		1	0	1	0
400	35-37	IVF	4	1	3	E,A,A,A	1	0	1	0
401	35-37	ICSI	5	4	1	E,E,E,A,E	0	0	0		1		0				1			0				1		0				1		0
402	<35	ICSI	4	4	0	E,E,E,E	0				1		0				1			1	0	1	0
403	<35	IVF	6	4	2	E,A,A,E,E,E	0				1		0				1			0				1		1	0	1	0
404	<35	ICSI	0	0	0
405	<35	ICSI	13	11	2	E,E,E,E,E,E,E,E,A,E,A,E,E	1	0	1	0
406	<35	ICSI	5	1	4	A,E,A,A,A	0				1		0				0	1		0				1		0				1		0
407	<35	IVF	3	3	0	E,E,E	0				1		0				1			0
408	35-37	ICSI	7	3	4	E,E,A,E,A,A,A	1	0	1	0
409	35-37	IVF	9	4	5	E,A,A,A,E,A,E,A,E	1	0	1	0
410	<35	IVF	2	1	1	A,E	0				1		1	1	0
411	<35	ICSI	4	3	1	E,E,A,E	0				1		0				1			0				1		1	0	1	0
412	35-37	ICSI	2	2	0	E,E	0	0	0		1		0
413	<35	ICSI	4	3	1	A,E,E,E	0				1		0				1			0				1		1	0	1	0
414	<35	ICSI	4	4	0	E,E,E,E	1	0	1	0
415	<35	ICSI	4	2	2	E,A,E,A	1	0	1	0
416	38-39	ICSI	0	0	0
417	35-37	ICSI	3	2	1	A,E,E	0	0	0		1		0				1			0
418	35-37	ICSI	5	2	3	A,E,A,A,E	1	0	1	0
419	<35	ICSI	5	3	2	E,A,E,A,E	0				1		0				1			1	0	1	0
420	<35	IVF	8	7	1	E,E,E,E,E,E,E,A	0				1		1	0	1	0
421	35-37	ICSI	4	2	2	A,A,E,E	0	0	0		1		0				1			0				0
422	<35	IVF	2	1	1	A,E	0				1		0
423	<35	IVF	8	6	2	A,E,E,E,A,E,E,E	0				1		1	0	1	0
424	<35	IVF	0	0	0
425	<35	IVF	2	1	1	A,E	0				1		1	0	1	0
426	35-37	IVF	14	8	6	E,A,A,E,A,E,A,A,E,E,E,E,E,A	0	0	0		1		0				1			0				1		0				1		0				1	1	0	1	0
427	<35	IVF	5	4	1	E,E,A,E,E	0				1		1	0	1	0
428	<35	ICSI	5	4	1	E,E,E,A,E	0				1		0				1			1	1	0		1		0				1		0
429	<35	ICSI	3	2	1	A,E,E	0				1		1	0	1	0
430	<35	ICSI	4	2	2	A,E,A,E	0				1		1	0	1	0
431	<35	ICSI	3	2	1	E,A,E	1	0	1	0
432	<35	ICSI	6	6	0	E,E,E,E,E,E	1	0	1	0
433	<35	ICSI	2	2	0	E,E	0				0
434	<35	ICSI	7	4	3	E,E,E,A,A,E,A	0				1		0				1			1	0	1	0
435	<35	ICSI	11	8	3	E,E,A,A,E,E,E,E,E,A,E	0				1		0				1			0				1		0				1		0				1	1	0	1	0
436	35-37	IVF	2	2	0	E,E	0	0	0		1		0
437	<35	IVF	3	2	1	A,E,E	0				1		0				1			1	0	1	0
438	<35	IVF	6	4	2	A,A,E,E,E,E	0				1		0				1			1	0	1	0
439	<35	ICSI	4	4	0	E,E,E,E	0				1		0				0	0
440	<35	IVF	2	2	0	E,E	1	0	1	0
441	<35	IVF	4	3	1	E,E,E,A	0				1		1	0	1	0
442	35-37	ICSI	5	4	1	E,E,A,E,E	1	0	1	0
443	<35	ICSI	0	0	0
444	38-39	ICSI	7	4	3	E,E,A,E,A,A,E	1	0	1	0
445	35-37	ICSI	5	3	2	A,E,E,A,E	0	0	0		1		1	0	1	0
446	<35	ICSI	9	6	3	E,E,E,A,E,A,A,E,E	1	0	1	0
447	38-39	ICSI	4	2	2	A,A,E,E	0	0	0		1		0				1			1	0	1	0
448	<35	ICSI	10	4	6	E,E,A,E,A,E,A,A,A,A	0				1		0				1			1	1	0		1		1	0	1	0
449	35-37	ICSI	5	3	2	E,E,A,E,A	1	0	1	0
450	35-37	ICSI	6	4	2	A,A,E,E,E,E	0	0	0		1		0				1			1	0	1	0
451	35-37	ICSI	0	0	0
452	35-37	ICSI	8	6	2	E,E,E,A,A,E,E,E	0	0	0		1		1	0	1	0
453	35-37	ICSI	5	2	3	E,A,A,E,A	1	0	1	0
454	35-37	ICSI	4	3	1	E,E,E,A	0	0	0		1		1	0	1	0
455	<35	IVF	4	2	2	A,A,E,E	0				1		0				1			0				1		0
456	<35	ICSI	4	3	1	E,E,E,A	0				1		0				1			0				1		0
457	<35	ICSI	6	5	1	E,E,A,E,E,E	0				1		1	0	1	0
458	<35	IVF	5	1	4	A,A,E,A,A	0				1		0				1			1	0	1	0
459	35-37	IVF	7	5	2	E,E,E,A,E,E,A	0	0	0		1		1	1	0		1			1	0	1	0
460	<35	ICSI	13	10	3	E,E,E,A,E,A,E,A,E,E,E,E	1	1	0		1		1	0	1	0
461	38-39	ICSI	2	0	2	A,A	0	0	0		1		0
462	<35	ICSI	2	1	1	A,E	0				1		0
463	35-37	ICSI	1	1	0	E	1	0	1	0
464	<35	ICSI	11	8	3	E,E,E,E,A,A,E,E,E,A,E	1	0	1	0
465	35-37	ICSI	0	0	0
466	35-37	ICSI	2	1	1	A,E	0	0	0		1		1	0	1	0
467	<35	ICSI	7	7	0	E,E,E,E,E,E,E	0				0	1	0				1			0				1		0				1		0				1	1	0	1	0
468	35-37	ICSI	3	3	0	E,E,E	1	0	1	0
469	<35	IVF	5	3	2	E,E,A,E,A	0				1		1	0	1	0
470	35-37	IVF	5	4	1	A,E,E,E,E	0	0	0		1		1	0	1	0
471	<35	ICSI	2	2	0	E,E	0				1		0
472	<35	ICSI	2	2	0	E,E	0				1		1	0	1	0
473	38-39	IVF	2	0	2	A,A	0	0	0		1		0
474	<35	ICSI	5	3	2	A,E,A,E,A	0				1		1	0	1	0
475	<35	ICSI	5	4	1	E,E,E,E,A	0				1		0				1			1	0	1	0
476	<35	IVF	5	5	0	E,E,E,E,E	0				0	1	0				1			1	0	1	0
477	<35	ICSI	7	6	1	E,E,E,A,E,E,E	1	0	1	0
478	35-37	ICSI	3	3	0	E,E,E	1	0	1	0
479	<35	Aban	0	0	0
480	<35	ICSI	4	4	0	E,E,E,E	0				1		0				0	1		1	0	1	0
481	<35	ICSI	7	7	0	E,E,E,E,E,E,E	0				1		1	0	1	0
482	<35	IVF	3	3	0	E,E,E	0				0	1	0
483	<35	IVF	4	2	2	E,A,E,A	0				1		0				1			0				1		0
484	<35	ICSI	6	6	0	E,E,E,E,E,E	0				1		0				1			0				1		1	0	1	0
485	<35	ICSI	2	2	0	E,E	0				1		1	0	1	0
486	<35	ICSI	6	3	3	E,A,A,E,E,A	0				1		0				1			0				1		1	0	1	0
487	<35	ICSI	0	0	0
488	<35	ICSI	2	2	0	E,E	1	0	1	0
489	35-37	ICSI	6	3	3	E,E,A,A,E,A	1	0	1	0
490	<35	ICSI	3	2	1	A,E,E	0				1		1	0	1	0
491	35-37	ICSI	0	0	0
492	<35	ICSI	1	1	0	E	1	1	0
493	<35	ICSI	7	6	1	E,E,E,E,E,E,A	1	0	1	0
494	35-37	IVF	4	2	2	E,E,A,A	0	0	0		1		1	0	1	0
495	<35	ICSI	6	5	1	E,E,E,E,E,A	0				1		0				1			0				1		0				1		1	0	1	0
496	35-37	ICSI	6	3	3	E,A,E,A,A,E	1	0	1	0
497	38-39	ICSI	5	2	3	A,A,E,A,E	0	0	0		1		0				0	1		0				1		1	0	1	0
498	<35	IVF	5	3	2	E,A,E,E,A	1	0	1	0
499	<35	ICSI	6	4	2	E,E,A,A,E,E	1	0	1	0
500	35-37	ICSI	4	4	0	E,E,E,E	0	0	0		1		0				1			1	0	1	0
501	<35	IVF	4	3	1	E,E,E,A	0				1		1	0	1	0
502	<35	IVF	8	5	3	E,A,E,E,A,A,E,E	1	0	1	0
503	<35	ICSI	6	4	2	E,E,A,E,E,A	1	0	1	0
504	<35	ICSI	5	4	1	E,E,E,E,A	0				1		0				1			0				1		0				1		0
505	<35	ICSI	9	7	2	E,A,E,E,A,E,E,E,E	0				1		0				1			1	0	1	0
506	<35	ICSI	9	6	3	E,E,A,E,E,A,A,E,E	0				1		1	0	1	0
507	<35	ICSI	5	5	0	E,E,E,E,E	0				1		0				1			1	0	1	0
508	<35	IVF	7	7	0	E,E,E,E,E,E,E	0				1		0				0	1		1	0	1	0
509	35-37	ICSI	6	5	1	E,A,E,E,E,E	0	0	0		1		0				1			1	0	1	0
510	<35	ICSI	7	5	2	E,E,A,A,E,E,E	1	0	1	0
511	<35	IVF	5	5	0	E,E,E,E,E	1	0	1	0
512	<35	ICSI	0	0	0
513	35-37	ICSI	4	4	0	E,E,E,E	0	0	0		1		1	0	1	0
514	<35	ICSI	0	0	0
515	<35	ICSI	7	5	2	E,A,A,E,E,E,E	0				1		0				1			1	0	1	0
516	35-37	IVF	1	1	0	E	0	0	0
517	<35	ICSI	4	4	0	E,E,E,E	0				1		1	0	1	0
518	<35	IVF	3	3	0	E,E,E	1	0	1	0
519	<35	ICSI	4	4	0	E,E,E,E	0				1		1	0	1	0
520	<35	Aban	0	0	0
521	38-39	ICSI	4	3	1	E,E,A,E	0	0	0		1		0				1			0				1		1	0	1	0
522	<35	IVF	4	3	1	E,E,A,E	0				1		0				1			0				1		1	0	1	0
523	<35	IVF	2	1	1	A,E	0				1		1	0	1	0
524	35-37	IVF	1	1	0	E	1	0	1	0
525	<35	ICSI	4	3	1	A,E,E,E	0				1		1	0	1	0
526	38-39	IVF	1	0	1	A	0	0	0
527	<35	ICSI	0	0	0
528	<35	ICSI	4	3	1	E,E,E,A	0				1		0				1			0				1		0
529	<35	ICSI	4	3	1	E,E,A,E	1	0	1	0
530	<35	IVF	5	4	1	E,E,A,E,E	1	1	0		1		0				1			0				1		0				1		1	0	1	0
531	38-39	ICSI	2	0	2	A,A	0	0	0		1		0
532	35-37	ICSI	3	1	2	A,A,E	0	0	0		1		0				1			0
533	35-37	IVF	6	3	3	E,A,A,A,E,E	1	0	1	0
534	<35	ICSI	0	0	0
535	<35	IVF	8	6	2	E,A,E,E,E,E,A,E	0				1		0				1			1	0	1	0
536	<35	ICSI	4	2	2	A,A,E,E	0				1		0				1			0				1		1	0	1	0
537	38-39	IVF	7	4	3	E,E,A,E,A,A,E	0	0	0		1		1	0	1	0
538	35-37	IVF	0	0	0
539	<35	ICSI	4	2	2	E,A,E,A	1	0	1	0
540	<35	IVF	11	8	3	E,E,A,E,E,E,A,E,E,A,E	1	0	1	0
541	35-37	IVF	6	3	3	A,E,E,A,A,E	0	0	0		1		0				1			0				1		0				1		0				1	0
542	38-39	ICSI	2	1	1	E,A	0	0	0		1		0
543	<35	ICSI	5	3	2	E,E,A,A,E	1	0	1	0
544	<35	ICSI	11	9	2	A,E,E,E,E,E,A,E,E,E,E	0				1		1	0	1	0
545	38-39	ICSI	3	2	1	A,E,E	0	0	0		1		0				1			1	0	1	0
546	38-39	ICSI	1	1	0	E	1	0	1	0
547	<35	ICSI	2	2	0	E,E	0				1		0
548	<35	ICSI	6	4	2	E,A,E,E,E,A	0				1		0				1			0				1		1	0	1	0
549	<35	ICSI	7	5	2	A,E,E,E,E,A,E	0				0	1	0				1			1	0	1	0
550	<35	ICSI	9	8	1	E,E,E,E,E,E,E,E,A	1	1	0		1		1	0	1	0
551	<35	ICSI	6	4	2	E,E,E,E,A,A	0				1		0				1			1	0	1	0
552	35-37	IVF	1	1	0	E	0	0	0
553	<35	ICSI	4	3	1	E,E,A,E	0				1		0				0	1		1	0	1	0
554	<35	IVF	4	3	1	E,A,E,E	0				1		0				0	1		1	0	1	0
555	<35	IVF	4	1	3	A,A,A,E	0				1		0				1			0				1		0
556	38-39	IVF	4	2	2	E,A,A,E	1	0	1	0
557	<35	ICSI	5	2	3	E,A,E,A,A	1	0	1	0
558	35-37	IVF	14	9	5	A,A,E,A,E,A,E,E,A,E,E,E,E,E	0	0	0		1		0				1			0				1		0				1		1	0	1	0
559	<35	ICSI	2	2	0	E,E	0				1		0
560	<35	ICSI	2	2	0	E,E	0				1		1	0	1	0
561	<35	ICSI	2	2	0	E,E	1	1	0		1		0
562	35-37	ICSI	4	3	1	E,E,E,A	1	0	1	0
563	35-37	ICSI	3	3	0	E,E,E	1	0	1	0
564	38-39	IVF	2	2	0	E,E	1	0	1	0
565	<35	ICSI	7	6	1	E,A,E,E,E,E,E	0				1		0				1			1	0	1	0
566	<35	IVF	2	2	0	E,E	0				1		0
567	<35	ICSI	5	3	2	A,A,E,E,E	1	1	0		1		0				1			1	0	1	0
568	35-37	ICSI	7	4	3	A,E,E,A,E,A,A	0	0	0		1		1	0	1	0
569	<35	ICSI	0	0	0
570	<35	ICSI	4	1	3	E,A,A,A	1	0	1	0
571	35-37	ICSI	4	2	2	E,A,A,E	0	0	0		1		0				1			0				1		1	1	0
572	<35	ICSI	7	5	2	E,A,E,E,E,A,E	0				0	1	0				1			0				1		1	0	1	0
573	<35	IVF	6	4	2	E,E,E,E,A,A	1	0	1	0
574	<35	ICSI	9	7	2	A,E,A,E,E,E,E,E,E	1	0	1	0
575	35-37	IVF	5	3	2	A,A,E,E,E	1	0	1	0
576	<35	IVF	4	2	2	E,E,A,A	0				1		0				1			0				1		0
577	<35	ICSI	9	8	1	E,E,E,E,E,A,E,E,E	0				0	1	0				1			1	0	1	0
578	<35	IVF	7	7	0	E,E,E,E,E,E,E	1	0	1	0
579	35-37	ICSI	0	0	0
580	35-37	ICSI	10	5	5	E,A,E,A,E,E,A,A,E,A	0	0	0		1		0				0	1		0				1		1	0	1	0
581	<35	IVF	10	10	0	E,E,E,E,E,E,E,E,E,E	0				1		1	0	1	0
582	<35	IVF	0	0	0
583	<35	IVF	8	5	3	E,A,E,E,A,E,E,A	0				1		0				1			0				1		0				1		0				1	1	0	1	0
584	38-39	IVF	5	3	2	E,A,E,E,A	0	0	0		1		0				1			1	0	1	0
585	35-37	IVF	4	2	2	E,E,A,A	0	0	0		1		1	0	1	0
586	<35	ICSI	5	4	1	E,E,E,E,A	1	0	1	0
587	<35	ICSI	0	0	0
588	<35	IVF	12	8	4	A,E,E,E,E,E,E,A,A,E,E,A	0				1		1	0	1	0
589	35-37	IVF	6	3	3	E,E,A,A,E,A	0	0	0		1		1	0	1	0
590	<35	IVF	2	1	1	E,A	1	0	1	0
591	38-39	ICSI	0	0	0
592	<35	ICSI	0	0	0
593	<35	ICSI	3	3	0	E,E,E	0				1		0				1			0
594	38-39	IVF	0	0	0
595	<35	ICSI	7	6	1	A,E,E,E,E,E,E	0				1		0				1			1	0	1	0
596	<35	ICSI	2	2	0	E,E	0				1		1	0	1	0
597	35-37	ICSI	5	4	1	A,E,E,E,E	0	0	0		1		1	0	1	0
598	35-37	IVF	0	0	0
599	<35	ICSI	5	3	2	E,E,E,A,A	1	0	1	0
600	<35	IVF	5	3	2	A,E,E,A,E	0				1		1	0	1	0
601	38-39	ICSI	2	1	1	A,E	0	0	0		1		1	0	1	0
602	<35	Aban	0	0	0
603	<35	ICSI	9	5	4	A,E,A,E,E,A,E,E,A	0				1		0				1			0				0	1	0				1		0				1	0				1	0				1	0
604	<35	ICSI	0	0	0
605	<35	IVF	8	3	5	A,A,A,E,E,A,E,A	0				1		0				1			0				1		1	0	1	0
606	<35	ICSI	3	2	1	A,E,E	1	0	1	0
607	38-39	ICSI	2	1	1	E,A	1	1	0		1		0
608	<35	ICSI	5	4	1	E,E,E,A,E	1	1	0		1		0				1			0				1		0				1		0
609	<35	ICSI	5	5	0	E,E,E,E,E	0				1		1	0	1	0
610	35-37	ICSI	1	1	0	E	0	0	0
611	<35	IVF	3	2	1	E,E,A	0				1		1	0	1	0
612	38-39	ICSI	2	0	2	A,A	0	0	0		1		0
613	35-37	ICSI	6	2	4	E,A,A,A,E,A	0	0	0		1		1	0	1	0
614	<35	ICSI	5	3	2	A,E,E,E,A	0				1		1	0	1	0
615	<35	IVF	3	3	0	E,E,E	0				1		1	0	1	0
616	<35	ICSI	9	4	5	E,A,A,E,E,A,A,A,E	1	0	1	0
617	<35	IVF	5	2	3	A,A,A,E,E	0				1		0				1			0				1		1	0	1	0
618	35-37	ICSI	1	1	0	E	1	0	1	0
619	35-37	ICSI	2	2	0	E,E	0	0	0		1		1	0	1	0
620	38-39	ICSI	0	0	0
621	<35	ICSI	10	7	3	E,A,A,E,E,E,E,E,A,E	0				1		0				1			0				1		0				1		0				1	0				1	0				1	0
622	38-39	ICSI	7	3	4	A,E,E,A,A,E,A	0	0	0		1		1	1	0		1			1	0	1	0
623	<35	ICSI	4	4	0	E,E,E,E	1	0	1	0
624	35-37	ICSI	1	0	1	A	0	0	0
625	35-37	IVF	4	3	1	A,E,E,E	0	0	0		1		1	0	1	0
626	35-37	ICSI	3	2	1	E,A,E	0	0	0		1		0				1			1	0	1	0
627	35-37	ICSI	4	1	3	A,A,E,A	0	0	0		1		0				1			0				1		0
628	<35	ICSI	7	6	1	E,E,E,E,A,E,E	1	0	1	0
629	<35	IVF	5	4	1	A,E,E,E,E	0				1		0				1			0				1		0				1		0
630	<35	ICSI	5	4	1	E,E,E,E,A	0				1		0				1			0				1		0				1		0
631	35-37	ICSI	2	0	2	A,A	0	0	0		1		0
632	38-39	ICSI	5	4	1	A,E,E,E,E	0	0	0		1		1	0	1	0
633	<35	IVF	5	3	2	A,E,E,A,E	0				1		0				1			1	0	1	0
634	<35	IVF	11	7	4	E,E,A,E,E,E,E,A,E,A,A	1	0	1	0
635	<35	ICSI	7	3	4	E,E,A,A,E,A,A	0				1		0				1			0				1		0				1		0				1	0				1	0
636	35-37	ICSI	5	4	1	E,A,E,E,E	1	0	1	0
637	<35	ICSI	4	3	1	E,A,E,E	0				1		0				1			1	0	1	0
638	35-37	ICSI	1	1	0	E	1	0	1	0
639	<35	IVF	8	8	0	E,E,E,E,E,E,E,E	0				1		0				1			0				1		1	0	1	0
640	<35	ICSI	5	3	2	E,A,E,A,E	1	0	1	0
641	<35	ICSI	0	0	0
642	<35	ICSI	9	8	1	E,E,E,A,E,E,E,E,E	0				1		0				1			0				1		0				1		1	0	1	0
643	<35	ICSI	0	0	0
644	<35	ICSI	11	6	5	E,E,E,A,E,A,A,E,A,A,E	1	0	1	0
645	<35	ICSI	5	5	0	E,E,E,E,E	0				1		1	0	1	0
646	<35	ICSI	3	2	1	E,E,A	1	0	1	0
647	<35	ICSI	10	9	1	E,E,E,E,E,E,E,A,E,E	0				1		0				1			0				1		0				1		0				1	0				1	1	0	1	0
648	38-39	ICSI	2	0	2	A,A	0	0	0		1		0
649	<35	ICSI	11	9	2	E,E,A,E,E,E,E,E,E,A,E	0				1		1	0	1	0
650	<35	IVF	4	3	1	E,E,E,A	1	1	0		1		0				1			1	0	1	0
651	35-37	ICSI	1	1	0	E	0	0	0
652	<35	ICSI	3	2	1	E,E,A	0				1		0				0
653	<35	IVF	7	4	3	E,A,A,E,E,A,E	1	0	1	0
654	<35	ICSI	9	8	1	E,A,E,E,E,E,E,E,E	1	0	1	0
655	<35	ICSI	5	2	3	A,E,E,A,A	0				1		1	0	1	0
656	<35	IVF	4	4	0	E,E,E,E	1	0	1	0
657	<35	IVF	7	6	1	E,E,E,E,E,E,A	0				1		1	0	1	0
658	<35	ICSI	5	5	0	E,E,E,E,E	0				1		1	0	1	0
659	<35	ICSI	2	2	0	E,E	0				1		1	0	1	0
660	<35	ICSI	5	4	1	E,E,E,A,E	0				1		0				1			0				1		0				0
661	<35	ICSI	9	6	3	E,E,E,A,E,A,E,A,E	1	0	1	0
662	35-37	ICSI	4	4	0	E,E,E,E	1	0	1	0
663	<35	IVF	6	5	1	E,E,A,E,E,E	0				1		1	0	1	0
664	38-39	ICSI	4	3	1	A,E,E,E	0	0	0		1		1	0	1	0
665	38-39	ICSI	0	0	0
666	<35	ICSI	7	4	3	E,E,A,A,A,E,A	1	0	1	0
667	<35	IVF	4	3	1	E,E,A,E	0				1		1	0	1	0
668	<35	ICSI	9	6	3	E,E,E,A,E,A,E,A,E	0				1		1	0	1	0
669	35-37	IVF	6	3	3	A,E,E,E,A,A	0	0	0		1		1	0	1	0
670	<35	ICSI	4	2	2	E,A,A,E	0				1		0				1			0				1		0
671	35-37	ICSI	2	2	0	E,E	0	0	0		1		0
672	<35	ICSI	4	4	0	E,E,E,E	0				1		0				1			1	0	1	0
673	<35	IVF	7	3	4	E,E,A,A,A,E,A	0				1		0				1			0				1		0				1		0				1	1	0	1	0
674	<35	IVF	4	2	2	E,A,E,A	0				1		0				1			0				1		0
675	<35	ICSI	0	0	0
676	38-39	ICSI	0	0	0
677	<35	IVF	3	3	0	E,E,E	0				1		1	0	1	0
678	<35	ICSI	5	2	3	E,A,A,A,E	0				1		0				1			0				1		0				1		0
679	<35	IVF	1	1	0	E	0
680	38-39	ICSI	0	0	0
681	<35	ICSI	2	1	1	A,E	0				1		1	0	1	0
682	<35	ICSI	0	0	0
683	<35	ICSI	2	1	1	A,E	0				1		1	0	1	0
684	<35	IVF	4	1	3	A,A,E,A	0				1		0				1			1	0	1	0
685	<35	IVF	4	3	1	E,E,E,A	1	0	1	0
686	<35	ICSI	0	0	0
687	<35	ICSI	3	3	0	E,E,E	1	0	1	0
688	38-39	ICSI	4	0	4	A,A,A,A	0	0	0		1		0				1			0				1		0
689	38-39	ICSI	0	0	0
690	35-37	ICSI	9	1	8	A,A,A,E,A,A,A,A,A	0	0	0		1		0				1			0				0	1	0				1		0				1	0				1	1	1	0		1	0
691	<35	ICSI	5	3	2	A,E,A,E,A	0				1		0				1			0				1		0				1		0
692	<35	IVF	9	7	2	E,E,E,A,E,E,A,E,E	1	0	1	0
693	<35	ICSI	0	0	0
694	<35	IVF	6	4	2	E,E,A,E,A,E	1	0	1	0
695	38-39	ICSI	9	8	1	E,E,A,E,E,E,E,E,E	1	0	1	0
696	<35	ICSI	3	1	2	A,E,A	0				1		1	0	1	0
697	<35	ICSI	2	2	0	E,E	0				1		1	0	1	0
698	<35	ICSI	6	5	1	E,A,E,E,E,E	1	0	1	0
699	<35	ICSI	6	4	2	E,E,A,E,E,A	1	0	1	0
700	35-37	ICSI	2	1	1	E,A	0	0	0		1		0
701	<35	ICSI	6	2	4	A,A,A,E,E,A	0				1		0				0	1		0				1		1	0	1	0
702	<35	IVF	5	4	1	E,E,E,A,E	1	0	1	0
703	38-39	ICSI	1	0	1	A	0	0	0
704	38-39	ICSI	7	3	4	A,A,A,A,E,E,E	0	0	0		1		0				1			0				1		1	0	1	0
705	<35	ICSI	9	8	1	E,E,E,E,E,E,A,E,E	1	0	1	0
706	35-37	ICSI	6	1	5	A,A,A,E,A,A	0	0	0		1		0				1			0				1		0				1		0				1	0
707	<35	IVF	7	6	1	E,E,E,E,A,E,E	1	0	1	0
708	<35	IVF	7	5	2	E,E,E,A,E,E,A	0				1		0				1			0				1		0				1		0				1	0				1	0
709	<35	ICSI	5	4	1	A,E,E,E,E	0				1		0				1			0				1		0				1		1	0	1	0
710	<35	IVF	7	5	2	A,E,E,A,E,E,E	0				1		1	0	1	0
711	<35	ICSI	8	5	3	E,E,E,E,A,A,E,A	0				1		1	0	1	0
712	<35	IVF	6	5	1	E,A,E,E,E,E	0				1		0				0	1		1	0	1	0
713	38-39	IVF	4	2	2	E,A,A,E	1	1	0		1		0				1			0				1		0
714	<35	ICSI	4	2	2	A,E,A,E	0				1		0				1			0				1		0
715	35-37	IVF	4	4	0	E,E,E,E	1	0	1	0
716	<35	ICSI	3	2	1	E,A,E	0				1		0				1			0
717	<35	ICSI	6	5	1	A,E,E,E,E,E	0				1		0				1			0				1		1	0	1	0
718	35-37	IVF	4	4	0	E,E,E,E	1	0	1	0
719	<35	IVF	11	8	3	E,E,E,A,A,E,E,A,E,E,E	0				1		0				0	1		0				1		0				1		0				1	1	0	1	0
720	<35	ICSI	7	4	3	E,E,E,A,A,E,A	0				1		0				1			1	0	1	0
721	<35	ICSI	0	0	0
722	<35	ICSI	4	3	1	E,E,A,E	0				1		1	0	1	0
723	35-37	ICSI	7	3	4	A,A,A,E,A,E,E	0	0	0		1		0				1			0				1		1	0	1	0
724	<35	ICSI	5	2	3	A,E,A,E,A	0				1		0				1			0				1		0				1		0
725	<35	IVF	3	1	2	A,E,A	1	0	1	0
726	<35	IVF	3	3	0	E,E,E	0				1		0				1			0
727	<35	ICSI	9	9	0	E,E,E,E,E,E,E,E,E	0				1		1	0	1	0
728	<35	ICSI	8	3	5	A,A,E,A,E,E,A,A	0				1		0				1			0				1		0				1		0				1	0				1	0				1	0
729	<35	ICSI	3	2	1	A,E,E	0				1		1	0	1	0
730	35-37	ICSI	5	3	2	E,E,A,E,A	0	0	0		1		0				1			0				1		0				1		0
731	<35	ICSI	7	3	4	E,A,E,A,A,E,A	1	0	1	0
732	<35	IVF	4	3	1	E,A,E,E	1	0	1	0
733	<35	ICSI	8	6	2	A,E,E,E,E,E,E,A	0				1		1	0	1	0
734	35-37	IVF	1	0	1	A	0	0	0
735	<35	IVF	4	3	1	A,E,E,E	1	0	1	0
736	<35	IVF	3	1	2	A,A,E	0				1		0				1			0
737	<35	ICSI	9	8	1	A,E,E,E,E,E,E,E,E	0				1		0				1			0				1		1	0	1	0
738	35-37	IVF	3	2	1	E,E,A	1	0	1	0
739	<35	ICSI	5	4	1	E,A,E,E,E	1	0	1	0
740	<35	ICSI	7	3	4	A,A,E,A,E,E,A	0				1		0				1			0				1		0				1		1	0	1	0
741	<35	ICSI	0	0	0
742	35-37	ICSI	5	5	0	E,E,E,E,E	0	0	0		1		0				1			0				1		1	0	1	0
743	<35	ICSI	4	2	2	E,A,A,E	0				1		0				0	1		0
744	<35	ICSI	3	3	0	E,E,E	1	0	1	0
745	35-37	ICSI	9	6	3	E,A,E,A,E,E,E,E,A	1	0	1	0
746	<35	ICSI	9	6	3	E,E,E,E,A,E,E,A,A	0				1		0				1			0				1		1	0	1	0
747	<35	ICSI	5	3	2	A,E,A,E,E	0				1		0				1			0				1		1	1	0		1		0
748	<35	ICSI	5	2	3	A,A,E,A,E	0				1		0				1			1	0	1	0
749	<35	ICSI	7	5	2	E,A,E,E,E,A,E	0				1		0				1			0				1		1	0	1	0
750	<35	IVF	4	3	1	E,E,E,A	0				1		1	0	1	0
751	<35	IVF	5	4	1	E,A,E,E,E	1	0	1	0
752	<35	ICSI	11	6	5	E,E,A,A,E,E,E,A,A,A,E	1	0	1	0
753	<35	IVF	7	6	1	E,E,A,E,E,E,E	1	1	0		0	1	0				1			0				1		1	0	1	0
754	<35	ICSI	5	5	0	E,E,E,E,E	0				1		1	0	1	0
755	35-37	ICSI	4	2	2	E,A,E,A	0	0	0		1		0				1			0				1		0
756	35-37	ICSI	0	0	0
757	35-37	IVF	1	1	0	E	0	0	0
758	<35	IVF	4	2	2	E,A,A,E	0				1		0				1			1	0	1	0
759	35-37	ICSI	1	1	0	E	0	0	0
760	<35	ICSI	6	3	3	A,E,A,A,E,E	0				1		0				1			0				1		0				1		0				1	0
761	<35	ICSI	2	2	0	E,E	1	0	1	0
762	<35	IVF	7	5	2	E,E,E,A,E,E,A	0				1		0				1			1	0	1	0
763	<35	IVF	9	5	4	E,E,A,E,A,A,E,A,E	0				1		0				1			0				1		0				1		0				1	0				1	0				1	0
764	38-39	ICSI	4	1	3	E,A,A,A	0	0	0		1		0				1			0				1		0
765	<35	IVF	3	2	1	E,E,A	0				1		0				1			0
766	<35	ICSI	5	4	1	A,E,E,E,E	1	1	0		1		0				1			0				1		1	0	1	0
767	<35	IVF	2	1	1	E,A	0				1		0
768	38-39	ICSI	4	3	1	E,E,E,A	1	0	1	0
769	<35	ICSI	2	2	0	E,E	0				1		1	1	0
770	35-37	IVF	4	3	1	E,A,E,E	0	0	0		1		0				1			1	0	1	0
771	35-37	ICSI	4	4	0	E,E,E,E	1	0	1	0
772	38-39	ICSI	5	4	1	E,E,A,E,E	0	0	0		1		0				1			0				1		0				1		0
773	<35	IVF	4	2	2	E,A,A,E	1	0	1	0
774	<35	ICSI	10	8	2	E,E,E,E,E,E,E,A,E,A	1	1	0		1		0				1			0				1		0				1		0				1	1	0	1	0
775	<35	ICSI	1	1	0	E	0
776	<35	IVF	3	2	1	E,A,E	0				1		0				1			0
777	35-37	ICSI	0	0	0
778	35-37	ICSI	0	0	0
779	35-37	ICSI	2	0	2	A,A	0	0	0		1		1	1	0
780	<35	ICSI	0	0	0
781	38-39	ICSI	5	1	4	A,A,A,E,A	0	0	0		0	1	1	0	1	0
782	35-37	IVF	0	0	0
783	<35	ICSI	3	2	1	E,E,A	0				1		1	0	1	0
784	<35	IVF	6	6	0	E,E,E,E,E,E	1	0	1	0
785	<35	IVF	3	3	0	E,E,E	1	0	1	0
786	35-37	ICSI	0	0	0
787	38-39	ICSI	0	0	0
788	35-37	ICSI	2	1	1	A,E	0	0	0		1		0
789	<35	ICSI	7	5	2	E,A,E,E,A,E,E	0				1		0				1			1	0	1	0
790	35-37	IVF	0	0	0
791	<35	IVF	9	6	3	E,E,E,A,A,E,E,E,A	0				1		1	0	1	0
792	<35	ICSI	7	4	3	A,E,A,E,A,E,E	0				1		0				0	1		1	0	1	1
793	<35	ICSI	7	5	2	E,A,E,E,E,E,A	0				1		1	1	0		1			1	0	1	0
794	<35	ICSI	3	2	1	E,E,A	0				1		1	0	1	0
795	<35	ICSI	5	2	3	E,A,E,A,A	0				1		0				1			1	0	1	0
796	<35	IVF	1	1	0	E	0
797	35-37	ICSI	0	0	0
798	<35	ICSI	4	3	1	E,E,A,E	1	1	0		1		1	0	1	0
799	<35	ICSI	10	4	6	A,E,E,A,E,E,A,A,A,A	0				1		1	0	1	0
800	35-37	ICSI	4	4	0	E,E,E,E	1	0	1	0
801	<35	IVF	6	3	3	A,E,A,E,E,A	0				1		1	0	1	0
802	<35	IVF	0	0	0
803	<35	ICSI	0	0	0
804	38-39	ICSI	5	3	2	E,A,E,E,A	0	0	0		1		0				1			0				1		0				1		0
805	<35	ICSI	10	7	3	E,A,A,E,E,E,A,E,E,E	1	0	1	0
806	<35	IVF	14	8	6	E,A,E,A,E,A,A,E,A,E,A,E,E,A	1	0	1	0
807	<35	ICSI	0	0	0
808	<35	ICSI	0	0	0
809	<35	IVF	5	2	3	E,A,A,A,E	0				1		0				1			0				1		0				1		1	0	1	0
810	<35	ICSI	3	3	0	E,E,E	1	0	1	1
811	<35	ICSI	9	8	1	E,E,E,E,E,E,E,E,A	0				1		1	0	1	0
812	<35	ICSI	4	2	2	E,A,A,E	0				1		0				1			1	1	0		1		1	0	1	0
813	35-37	IVF	0	0	0
814	<35	IVF	9	7	2	A,E,E,A,E,E,E,E,E	0				1		0				1			0				1		0				1		1	0	1	0
815	<35	ICSI	11	7	4	E,A,E,E,A,A,A,E,E,E,E	0				1		1	0	1	0
816	<35	IVF	0	0	0
817	35-37	ICSI	8	4	4	E,A,A,E,A,A,E,E	0	0	0		1		0				1			0				1		1	0	1	0
818	<35	IVF	4	3	1	E,E,E,A	0				1		0				1			1	0	1	0
819	<35	IVF	5	5	0	E,E,E,E,E	1	0	1	0
820	35-37	ICSI	4	2	2	A,E,A,E	0	0	0		1		1	0	1	0
821	35-37	ICSI	6	3	3	A,E,A,E,E,A	0	0	0		1		1	0	1	0
822	<35	ICSI	5	3	2	E,E,A,E,A	0				1		0				0	1		0				1		0				1		0
823	<35	ICSI	10	8	2	A,E,E,E,E,E,E,E,E,A	0				1		1	0	1	0
824	<35	ICSI	4	1	3	A,A,E,A	0				1		0				1			1	0	1	0
825	<35	ICSI	7	6	1	E,E,E,E,A,E,E	1	0	1	0
826	35-37	ICSI	2	1	1	A,E	0	0	0		1		0
827	<35	IVF	6	4	2	A,E,E,A,E,E	0				1		1	0	1	0
828	<35	Aban	0	0	0
829	<35	ICSI	3	1	2	E,A,A	0				1		0				1			0
830	35-37	IVF	6	2	4	E,A,A,E,A,A	1	0	1	0
831	35-37	ICSI	4	2	2	A,E,E,A	0	0	0		1		0				1			1	0	1	0
832	<35	ICSI	7	6	1	E,E,E,E,A,E,E	0				1		1	0	1	0
833	35-37	ICSI	5	1	4	A,E,A,A,A	0	0	0		1		0				1			1	0	1	0
834	38-39	ICSI	7	4	3	A,E,E,A,E,A,E	0	0	0		1		0				1			0				1		0				1		1	0	1	0
835	<35	ICSI	5	4	1	E,A,E,E,E	0				1		0				1			1	0	1	0
836	<35	ICSI	0	0	0
837	35-37	IVF	8	7	1	E,E,A,E,E,E,E,E	1	0	1	0
838	<35	ICSI	5	5	0	E,E,E,E,E	1	0	1	0
839	<35	IVF	5	5	0	E,E,E,E,E	1	0	1	0
840	38-39	IVF	14	2	12	A,A,E,A,A,A,A,A,A,A,A,E,A,A	0	0	0		1		0				1			1	0	1	0
841	<35	ICSI	7	5	2	E,A,E,E,E,E,A	0				1		0				1			1	0	1	0
842	<35	ICSI	2	1	1	A,E	0				1		0
843	<35	IVF	4	4	0	E,E,E,E	0				1		0				1			1	0	1	0
844	35-37	ICSI	5	4	1	E,E,E,E,A	1	0	1	0
845	38-39	IVF	0	0	0
846	<35	IVF	5	3	2	A,E,E,A,E	1	1	0		1		0				1			0				1		0				1		0
847	<35	IVF	10	6	4	E,A,E,E,E,A,E,A,E,A	0				1		0				1			1	0	1	0
848	35-37	ICSI	7	6	1	E,E,E,A,E,E,E	0	0	0		1		1	0	1	0
849	<35	IVF	4	3	1	A,E,E,E	0				1		1	0	1	0
850	35-37	ICSI	0	0	0
851	35-37	IVF	2	1	1	A,E	0	0	0		1		0
852	<35	IVF	7	4	3	E,A,E,A,A,E,E	1	0	1	0
853	<35	ICSI	9	5	4	A,E,E,A,E,A,E,A,E	0				1		1	0	1	0
854	<35	ICSI	5	4	1	E,A,E,E,E	0				1		0				1			0				1		1	0	1	0
855	35-37	ICSI	14	6	8	E,E,A,E,A,E,A,A,A,A,E,A,A,E	1	0	1	0
856	35-37	ICSI	8	7	1	E,E,E,E,A,E,E,E	1	0	1	0
857	<35	ICSI	3	3	0	E,E,E	1	0	1	0
858	<35	ICSI	4	2	2	A,A,E,E	0				1		0				1			1	0	1	0
859	<35	ICSI	4	4	0	E,E,E,E	0				1		0				1			1	0	1	0
860	<35	ICSI	5	4	1	E,A,E,E,E	0				1		0				1			0				0	1	1	0	1	0
861	<35	IVF	5	2	3	A,E,A,A,E	0				1		0				1			1	0	1	0
862	<35	IVF	6	4	2	A,E,E,A,E,E	0				1		1	0	1	0
863	<35	ICSI	8	6	2	E,A,A,E,E,E,E,E	0				1		0				1			1	0	1	0
864	<35	ICSI	7	5	2	A,E,E,E,E,A,E	1	1	0		1		0				1			1	0	1	0
865	<35	ICSI	1	0	1	A	0
866	38-39	IVF	0	0	0
867	35-37	IVF	3	2	1	A,E,E	0	0	0		1		0				1			0
868	35-37	IVF	6	4	2	E,A,E,A,E,E	0	0	0		1		0				1			1	0	1	0
869	35-37	ICSI	3	3	0	E,E,E	0	0	0		1		0				1			0
870	35-37	Aban	0	0	0
871	35-37	ICSI	7	6	1	E,E,E,E,A,E,E	0	0	0		1		0				1			1	0	1	0
872	<35	ICSI	4	3	1	E,A,E,E	1	0	1	0
873	<35	ICSI	8	7	1	E,E,E,A,E,E,E,E	1	0	1	0
874	38-39	ICSI	3	2	1	E,A,E	1	0	1	0
875	35-37	ICSI	6	4	2	E,E,A,A,E,E	0	0	0		1		1	0	1	0
876	<35	IVF	5	4	1	E,A,E,E,E	1	0	1	0
877	<35	IVF	6	5	1	E,E,E,E,A,E	1	0	1	0
878	<35	IVF	3	1	2	E,A,A	1	0	1	0
879	<35	ICSI	8	5	3	E,A,E,E,E,E,A,A	0				1		0				1			1	0	1	0
880	<35	ICSI	5	2	3	A,A,E,A,E	0				1		0				1			1	0	1	0
881	35-37	ICSI	1	0	1	A	0	0	0
882	35-37	IVF	3	1	2	A,A,E	0	0	0		1		0				1			0
883	<35	ICSI	14	7	7	E,A,A,E,A,E,A,E,A,E,E,A,E,A	0				1		1	1	0		1			0				1		0				0	1	0				1	0				1	0				1	1	0	1
884	<35	IVF	4	3	1	E,E,A,E	0				1		1	0	1	0
885	<35	ICSI	2	2	0	E,E	0				1		0
886	<35	IVF	8	5	3	E,E,A,E,E,A,E,A	0				1		0				1			0				1		0				1		1	0	1	0
887	<35	Aban	0	0	0
888	<35	ICSI	4	2	2	A,A,E,E	0				1		0				1			1	0	1	0
889	38-39	IVF	2	1	1	E,A	0	0	0		1		0
890	38-39	IVF	5	3	2	A,E,E,E,A	0	0	0		1		0				1			0				1		1	0	1	0
891	35-37	IVF	0	0	0
892	<35	ICSI	11	10	1	E,E,E,E,E,E,E,A,E,E,E	0				1		0				1			0				1		0				1		1	0	1	0
893	<35	ICSI	5	3	2	E,A,A,E,E	1	0	1	0
894	<35	ICSI	6	5	1	E,E,A,E,E,E	0				1		0				1			0				1		1	0	1	0
895	35-37	ICSI	7	5	2	A,E,A,E,E,E,E	0	0	0		1		0				1			0				1		1	1	0		1		0				1	1	0	1	0
896	<35	ICSI	7	5	2	E,E,E,E,A,E,A	0				0	1	1	0	1	0
897	35-37	ICSI	4	2	2	A,E,E,A	0	0	0		1		0				1			0				1		0
898	35-37	ICSI	8	6	2	E,E,E,E,E,E,A,A	1	0	1	0
899	<35	IVF	1	1	0	E	0
900	<35	ICSI	2	2	0	E,E	1	1	0		1		0
901	<35	ICSI	11	8	3	A,E,E,E,E,E,E,A,E,A,E	0				1		1	0	1	0
902	35-37	ICSI	2	0	2	A,A	0	0	0		1		0
903	35-37	ICSI	0	0	0
904	<35	ICSI	0	0	0
905	38-39	IVF	4	3	1	E,E,E,A	0	0	0		1		1	0	1	0
906	<35	ICSI	2	1	1	A,E	0				1		0
907	<35	ICSI	5	4	1	E,E,E,A,E	1	0	1	0
908	<35	IVF	2	2	0	E,E	1	0	1	0
909	38-39	ICSI	2	1	1	E,A	1	0	1	0
910	<35	IVF	8	6	2	A,E,E,A,E,E,E,E	0				1		1	0	1	0
911	35-37	ICSI	6	2	4	E,A,A,E,A,A	0	0	0		1		0				1			0				1		1	0	1	0
912	<35	IVF	6	3	3	E,E,E,A,A,A	1	0	1	0
913	<35	ICSI	14	9	5	A,E,A,A,E,E,A,E,E,E,E,A,E,E	0				1		0				1			0				1		0				1		0				1	1	0	1	0
914	<35	ICSI	1	1	0	E	0
915	<35	IVF	4	3	1	E,E,A,E	0				1		1	0	1	0
916	35-37	IVF	2	2	0	E,E	1	0	1	0
917	35-37	ICSI	4	3	1	E,A,E,E	1	0	1	0
918	<35	ICSI	8	6	2	E,A,E,E,E,A,E,E	0				1		0				1			0				1		1	0	1	0
919	35-37	ICSI	4	3	1	E,E,E,A	1	0	1	0
920	<35	ICSI	10	6	4	E,E,A,E,E,A,A,E,E,A	0				1		0				1			0				1		1	0	1	0
921	35-37	IVF	0	0	0
922	38-39	IVF	0	0	0
923	<35	ICSI	4	3	1	E,E,A,E	0				1		1	0	1	0
924	<35	ICSI	2	2	0	E,E	0				0
925	38-39	ICSI	0	0	0
926	<35	ICSI	6	2	4	A,E,E,A,A,A	0				1		1	1	0		1			1	0	1	0
927	<35	ICSI	3	2	1	E,E,A	1	0	1	0
928	38-39	ICSI	4	3	1	A,E,E,E	0	0	0		1		0				1			1	1	0		1		0
929	<35	ICSI	7	6	1	E,E,A,E,E,E,E	0				1		0				1			0				1		0				1		1	0	1	0
930	35-37	ICSI	3	3	0	E,E,E	0	0	0		1		0				1			0
931	<35	ICSI	8	7	1	E,E,E,E,E,E,A,E	1	0	1	0
932	35-37	IVF	10	6	4	A,E,E,E,E,E,E,A,A,A	0	0	0		1		1	1	0		1			0				1		1	0	1	0
933	<35	IVF	7	4	3	A,E,A,A,E,E,E	0				1		1	0	1	0
934	<35	ICSI	5	5	0	E,E,E,E,E	1	0	1	0
935	<35	ICSI	4	3	1	A,E,E,E	0				1		0				1			1	0	1	0
936	<35	IVF	14	9	5	E,A,E,A,E,A,E,E,A,E,A,A,A,E	1	0	1	0
937	<35	IVF	7	6	1	E,E,E,E,E,E,A	1	0	1	0
938	38-39	ICSI	2	0	2	A,A	0	0	0		1		0
939	35-37	ICSI	2	2	0	E,E	1	0	1	0
940	<35	IVF	7	4	3	A,E,A,E,A,A,E	0				1		0				1			0				1		1	0	1	0
941	<35	ICSI	4	2	2	A,A,E,E	0				1		0				1			0				1		0
942	<35	IVF	8	6	2	A,A,E,E,E,E,E,E	0				0	1	1	0	1	0
943	35-37	ICSI	0	0	0
944	<35	IVF	7	6	1	E,E,A,E,E,E,E	0				0	1	0				1			0				1		0				1		0				1	1	0	1	0
945	<35	IVF	2	2	0	E,E	1	0	1	0
946	35-37	ICSI	0	0	0
947	38-39	IVF	0	0	0
948	<35	ICSI	8	3	5	A,A,E,E,A,A,E,A	0				1		0				1			1	0	1	0
949	<35	ICSI	2	1	1	A,E	1	1	0		1		0
950	35-37	ICSI	0	0	0
951	<35	IVF	0	0	0
952	<35	IVF	2	2	0	E,E	0				1		0
953	35-37	ICSI	6	5	1	E,E,E,E,E,A	0	0	0		1		0				1			1	0	1	0
954	35-37	IVF	4	2	2	E,A,A,E	0	0	0		1		1	0	1	0	1
955	35-37	ICSI	5	3	2	A,E,A,E,E	0	0	0		1		1	0	1	0
956	<35	ICSI	5	4	1	E,A,E,E,E	0				1		0				1			0				0	1	1	0	1	0
957	38-39	ICSI	2	2	0	E,E	0	0	0		1		1	0	1	0
958	35-37	ICSI	4	1	3	E,A,A,A	0	0	0		1		1	0	1	0
959	<35	IVF	4	2	2	E,A,E,A	1	0	1	0
960	<35	ICSI	9	7	2	A,E,E,E,E,A,E,E,E	0				1		0				1			1	0	1	0
961	<35	ICSI	3	2	1	A,E,E	0				1		0				1			0
962	35-37	ICSI	6	5	1	E,E,E,A,E,E	0	0	0		1		0				1			1	0	1	0
963	<35	IVF	4	3	1	E,A,E,E	0				1		0				1			0				1		0
964	38-39	ICSI	0	0	0
965	<35	ICSI	11	9	2	E,E,A,A,E,E,E,E,E,E,E	0				1		0				1			0				1		0				1		1	0	1	0
966	38-39	ICSI	2	1	1	E,A	0	0	0		1		0
967	35-37	ICSI	4	2	2	E,A,E,A	1	0	1	0
968	<35	ICSI	4	3	1	E,A,E,E	0				1		0				1			1	0	1	0
969	<35	ICSI	1	0	1	A	0
970	38-39	ICSI	5	4	1	E,A,E,E,E	0	0	0		1		0				1			1	0	1	0
971	35-37	ICSI	0	0	0
972	<35	IVF	0	0	0
973	<35	IVF	0	0	0
974	38-39	ICSI	4	2	2	A,E,A,E	0	0	0		1		1	0	1	0
975	<35	ICSI	4	3	1	E,A,E,E	0				1		0				1			1	0	1	0
976	<35	IVF	2	1	1	E,A	0				1		1	1	0
977	35-37	ICSI	4	2	2	E,A,E,A	1	0	1	0
978	38-39	ICSI	3	1	2	E,A,A	1	0	1	0
979	35-37	ICSI	6	2	4	A,E,A,A,E,A	0	0	0		1		0				1			0				1		0				1		0				1	0
980	<35	ICSI	2	2	0	E,E	0				1		0
981	<35	ICSI	4	2	2	A,A,E,E	0				1		0				1			0				1		0
982	<35	ICSI	3	3	0	E,E,E	0				1		1	0	1	0
983	<35	IVF	4	3	1	A,E,E,E	0				1		0				1			1	0	1	0
984	35-37	ICSI	3	2	1	E,A,E	0	0	0		0	1	1	0	1	0
985	<35	ICSI	5	3	2	E,A,E,E,A	1	0	1	0
986	<35	ICSI	0	0	0
987	35-37	ICSI	4	3	1	E,A,E,E	1	0	1	0
988	<35	ICSI	2	2	0	E,E	0				1		0
989	<35	ICSI	6	3	3	E,E,A,A,A,E	0				1		0				1			0				1		0				1		0				1	0
990	35-37	IVF	3	2	1	E,A,E	0	0	0		1		0				1			1	0	1	0
991	<35	IVF	2	2	0	E,E	0				1		0
992	<35	IVF	5	4	1	E,E,E,A,E	1	0	1	0
993	35-37	IVF	3	3	0	E,E,E	0	0	0		1		0				0
994	35-37	ICSI	0	0	0
995	<35	ICSI	5	3	2	A,A,E,E,E	1	0	1	0
996	35-37	IVF	8	3	5	A,A,E,E,E,A,A,A	0	0	0		1		0				1			0				1		0				1		0				1	0				1	0				1	0
997	35-37	ICSI	2	1	1	A,E	0	0	0		1		0
998	<35	ICSI	9	7	2	A,E,E,E,E,E,E,A,E	0				1		0				0	1		1	0	1	0
999	38-39	ICSI	1	1	0	E	1	0	1	0
1000	<35	ICSI	6	5	1	E,E,E,E,A,E	1	0	1	0
[truncated: 32 more columns]

## Sheet: 2 PGS1
							Attempt 1				440		Attempt 2				189			Attempt 3				66	Attempt 4				21	Attempt 5				10	Attempt 6				3	Attempt 7				1	Attempt 8				0
		870	11	859			841	27	335		434			7	174		186				2	78		64		0	30		21		1	7		10		0	6		3		0	2		1		0	1		0
ID	Age (y)	Insemination	Embryos (n)	Euploid (n)	Aneuploid (n)	Transfer order	Pregnant	Miscarriage	Live birth	Multiple	Thaw1	Thaw1a	Pregnant	Miscarriage	Live birth	Multiple	Thaw2	Thaw2b	Thaw2c	Pregnant	Miscarriage	Live birth	Multiple	Thaw3	Pregnant	Miscarriage	Live birth	Multiple	Thaw4	Pregnant	Miscarriage	Live birth	Multiple	Thaw5	Pregnant	Miscarriage	Live birth	Multiple	Thaw6	Pregnant	Miscarriage	Live birth	Multiple	Thaw7	Pregnant	Miscarriage	Live birth	Multiple	Thaw8
1	<35	ICSI	0	0	0
2	<35	ICSI	7	5	2	E,E,A,A,E,E,E	1	0	1	0
3	<35	ICSI	6	3	3	A,E,E,A,E,A	0				1		0				1			0
4	<35	IVF	4	3	1	E,E,E,A	1	0	1	0
5	<35	ICSI	2	1	1	A,E	0
6	35-37	IVF	2	1	1	E,A	0	0	0
7	<35	ICSI	0	0	0
8	<35	ICSI	4	2	2	E,A,E,A	0	0	0		1		1	0	1	0
9	<35	IVF	12	6	6	E,E,A,E,A,A,E,A,E,A,E,A	1	0	1	0
10	35-37	ICSI	0	0	0
11	38-39	ICSI	4	3	1	E,E,E,A	0	0	0		1		0				1			0
12	38-39	ICSI	0	0	0
13	<35	IVF	2	2	0	E,E	0	0	0		1		1	0	1	0
14	<35	IVF	1	0	1	A
15	<35	ICSI	5	4	1	E,E,A,E,E	1	0	1	0
16	<35	ICSI	7	3	4	E,A,E,E,A,A,A	1	0	1	0
17	<35	IVF	4	3	1	E,E,E,A	0	0	0		1		0				1			1	0	1	0
18	38-39	ICSI	5	1	4	E,A,A,A,A	0	0	0
19	35-37	ICSI	1	0	1	A
20	<35	ICSI	2	2	0	E,E	1	0	1	0
21	<35	ICSI	4	4	0	E,E,E,E	1	0	1	0
22	<35	ICSI	5	2	3	E,A,A,E,A	0	0	0		1		0
23	<35	IVF	4	3	1	E,E,E,A	0	0	0		1		0				1			0
24	38-39	Aban	0	0	0
25	<35	IVF	8	5	3	A,E,E,E,A,E,E,A	1	0	1	0
26	<35	IVF	0	0	0
27	<35	ICSI	0	0	0
28	<35	ICSI	5	3	2	A,A,E,E,E	0				1		0				1			0
29	35-37	Aban	0	0	0
30	35-37	IVF	4	2	2	A,E,E,A	1	0	1	0
31	<35	ICSI	7	7	0	E,E,E,E,E,E,E	1	0	1	0
32	<35	IVF	1	1	0	E	0	0	0
33	<35	IVF	12	8	4	E,E,E,A,A,A,E,E,E,E,E,A	0	0	0		1		0				1			1	0	1	0
34	<35	ICSI	12	3	9	A,A,A,E,A,A,A,E,A,E,A,A	1	1	0		1		0				1			1	0	1	0
35	<35	ICSI	2	1	1	E,A	1	0	1	0
36	38-39	Aban	0	0	0
37	<35	ICSI	3	2	1	A,E,E	1	0	1	0
38	<35	ICSI	7	4	3	E,A,A,E,E,E,A	1	0	1	0
39	<35	ICSI	6	4	2	E,A,E,E,A,E	1	0	1	0
40	<35	ICSI	5	5	0	E,E,E,E,E	1	0	1	0
41	38-39	ICSI	2	1	1	E,A	1	0	1	0
42	<35	IVF	5	5	0	E,E,E,E,E	0	0	0		1		0				1			0				1	0				1	1	0	1	0
43	38-39	ICSI	2	1	1	A,E	1	0	1	0
44	<35	IVF	2	2	0	E,E	0	0	0		1		0
45	35-37	IVF	5	3	2	A,A,E,E,E	1	0	1	0
46	35-37	ICSI	3	3	0	E,E,E	0	0	0		1		0				1			0
47	<35	ICSI	3	2	1	E,E,A	0	0	0		1		1	0	1	0
48	<35	IVF	0	0	0
49	<35	ICSI	6	4	2	E,E,A,A,E,E	0	0	0		1		0				1			0				0
50	<35	IVF	6	6	0	E,E,E,E,E,E	1	0	1	0
51	<35	ICSI	9	9	0	E,E,E,E,E,E,E,E,E	0	0	0		1		0				1			1	0	1	0
52	<35	ICSI	11	8	3	E,E,A,E,E,A,E,A,E,E,E	1	0	1	0
53	<35	ICSI	8	3	5	E,A,A,A,E,A,A,E	0	0	0		1		1	0	1	0
54	<35	ICSI	6	4	2	A,E,E,E,E,A	1	0	1	0
55	<35	ICSI	5	4	1	E,E,E,A,E	1	0	1	0
56	<35	ICSI	4	4	0	E,E,E,E	1	0	1	0
57	<35	ICSI	9	5	4	E,A,A,E,E,E,A,E,A	1	0	1	0
58	35-37	ICSI	0	0	0
59	<35	IVF	5	4	1	E,E,E,A,E	0	0	0		1		0				1			0				1	0
60	<35	IVF	7	5	2	E,A,E,A,E,E,E	0	0	0		1		0				1			0				1	0				1	0
61	<35	ICSI	4	4	0	E,E,E,E	1	0	1	0
62	<35	ICSI	7	5	2	A,E,E,A,E,E,E	0				1		1	0	1	0
63	38-39	ICSI	2	2	0	E,E	0	0	0		1		0
64	38-39	IVF	1	0	1	A
65	35-37	IVF	7	4	3	E,A,A,E,A,A,E	1	0	1	0
66	<35	ICSI	3	3	0	E,E,E	1	0	1	0
67	<35	ICSI	4	4	0	E,E,E,E	1	0	1	0
68	<35	ICSI	8	6	2	E,E,A,E,E,E,E,A	1	0	1	0
69	<35	ICSI	6	3	3	E,E,A,E,A,A	0	0	0		1		1	0	1	0
70	<35	ICSI	6	5	1	E,E,E,A,E,E	0	0	0		1		1	0	1	0
71	38-39	IVF	3	3	0	E,E,E	0	0	0		1		0				1			0
72	<35	ICSI	5	3	2	A,A,E,E,E	0				1		1	0	1	0
73	<35	IVF	9	8	1	E,A,E,E,E,E,E,E,E	0	0	0		1		0				1			0				1	0				1	0				1	1	0	1	0
74	38-39	ICSI	1	1	0	E	0	0	0
75	<35	ICSI	9	5	4	E,A,A,E,E,A,E,E,A	1	0	1	0
76	<35	IVF	3	2	1	E,E,A	0	0	0		1		0
77	38-39	IVF	4	3	1	E,A,E,E	0	0	0		1		1	0	1	0
78	35-37	IVF	6	5	1	E,E,E,E,E,A	1	0	1	0
79	35-37	ICSI	3	1	2	E,A,A	1	0	1	0
80	35-37	ICSI	5	5	0	E,E,E,E,E	0	0	0		1		1	0	1	0
81	<35	IVF	0	0	0
82	<35	ICSI	7	5	2	E,A,E,A,E,E,E	1	0	1	0
83	<35	IVF	6	6	0	E,E,E,E,E,E	1	0	1	0
84	38-39	ICSI	4	1	3	E,A,A,A	1	0	1	0
85	<35	ICSI	5	4	1	E,E,A,E,E	1	0	1	0
86	<35	ICSI	7	2	5	A,A,E,A,A,A,E	0				1		0
87	<35	IVF	7	5	2	E,A,E,E,E,E,A	0	0	0		1		1	0	1	0
88	35-37	ICSI	1	1	0	E	0	0	0
89	35-37	ICSI	10	7	3	A,E,E,E,E,E,E,E,A,A	0				1		0				1			1	0	1	0
90	35-37	ICSI	4	3	1	A,E,E,E	1	1	0		1		1	0	1	0
91	<35	ICSI	8	6	2	E,E,E,E,E,A,E,A	1	0	1	0
92	<35	IVF	4	3	1	A,E,E,E	0				1		0				1			0
93	35-37	IVF	4	4	0	E,E,E,E	1	0	1	0
94	<35	IVF	9	4	5	A,A,A,E,A,E,E,E,A	0				1		1	0	1	0
95	35-37	ICSI	3	2	1	A,E,E	0				1		0
96	35-37	IVF	0	0	0
97	35-37	IVF	4	3	1	E,E,E,A	1	0	1	0
98	<35	IVF	8	6	2	E,E,E,E,E,E,A,A	1	0	1	0
99	38-39	ICSI	5	2	3	E,A,A,E,A	0	0	0		1		0
100	35-37	ICSI	4	2	2	A,E,E,A	0				1		0
101	35-37	ICSI	4	2	2	E,E,A,A	0	0	0		1		1	0	1	0
102	<35	ICSI	5	4	1	E,A,E,E,E	0	0	0		1		0				1			1	0	1	0
103	35-37	IVF	2	1	1	A,E	1	0	1	0
104	<35	ICSI	5	4	1	E,E,E,E,A	0	0	0		1		0				1			1	0	1	0
105	35-37	IVF	2	1	1	A,E	1	0	1	0
106	35-37	IVF	2	1	1	A,E	1	0	1	0
107	<35	ICSI	6	2	4	A,E,A,A,E,A	1	0	1	0
108	<35	ICSI	4	3	1	E,E,A,E	1	0	1	0
109	35-37	ICSI	2	0	2	A,A
110	35-37	ICSI	5	4	1	E,A,E,E,E	0	0	0		1		0				1			0				1	1	0	1	0
111	<35	IVF	6	5	1	E,E,E,E,A,E	1	0	1	0
112	38-39	IVF	4	1	3	E,A,A,A	1	0	1	0
113	<35	ICSI	1	1	0	E	1	0	1	0
114	<35	ICSI	5	4	1	E,E,A,E,E	0	0	0		1		0				1			1	1	0		1	1	0	1	0
115	<35	Aban	0	0	0
116	35-37	ICSI	3	2	1	A,E,E	0				1		0
117	<35	ICSI	4	3	1	E,E,E,A	1	0	1	0
118	<35	ICSI	3	2	1	E,A,E	0	0	0		1		1	0	1	0
119	35-37	ICSI	2	1	1	A,E	1	0	1	0
120	<35	ICSI	8	5	3	E,A,E,A,A,E,E,E	0	0	0		1		0				1			0				1	1	0	1	0
121	35-37	ICSI	4	3	1	E,E,A,E	1	0	1	0
122	<35	IVF	9	7	2	E,A,E,E,E,E,A,E,E	1	0	1	1
123	<35	ICSI	5	2	3	E,A,E,A,A	1	0	1	0
124	<35	IVF	5	3	2	E,E,E,A,A	1	1	0		1		0				1			1	0	1	0
125	<35	ICSI	5	4	1	E,A,E,E,E	0	0	0		1		0				1			1	0	1	0
126	<35	ICSI	9	7	2	E,E,E,E,E,A,E,E,A	1	0	1	0
127	35-37	ICSI	2	2	0	E,E	0	0	0		1		0
128	<35	IVF	5	4	1	E,E,E,A,E	1	0	1	0
129	35-37	ICSI	2	2	0	E,E	1	0	1	0
130	<35	ICSI	3	2	1	A,E,E	0				1		0
131	<35	ICSI	4	3	1	E,E,E,A	1	0	1	0
132	38-39	IVF	2	0	2	A,A
133	38-39	ICSI	0	0	0
134	<35	IVF	7	5	2	E,E,E,A,E,A,E	0	0	0		1		1	0	1	0
135	35-37	ICSI	3	2	1	E,E,A	1	0	1	0
136	35-37	IVF	3	2	1	E,A,E	1	0	1	0
137	<35	ICSI	4	2	2	A,E,E,A	1	0	1	0
138	<35	ICSI	8	6	2	E,A,A,E,E,E,E,E	0	0	0		1		0				1			1	0	1	0
139	<35	IVF	0	0	0
140	<35	ICSI	5	4	1	E,E,E,A,E	1	0	1	0
141	35-37	IVF	14	10	4	A,A,E,E,A,E,A,E,E,E,E,E,E,E	1	0	1	0
142	<35	ICSI	6	4	2	E,A,E,A,E,E	0	0	0		1		0				1			1	0	1	0
143	35-37	IVF	8	4	4	A,A,E,A,E,A,E,E	0				1		0				1			1	0	1	0
144	35-37	ICSI	0	0	0
145	<35	ICSI	0	0	0
146	35-37	IVF	10	7	3	E,E,A,A,E,E,E,E,E,A	0	0	0		1		1	0	1	0
147	35-37	ICSI	2	2	0	E,E	0	0	0		1		0
148	<35	IVF	3	2	1	E,E,A	0	0	0		1		1	0	1	0
149	<35	ICSI	4	3	1	E,E,A,E	0	0	0		1		0				1			0
150	38-39	ICSI	4	3	1	A,E,E,E	0				1		0				1			0
151	<35	IVF	3	2	1	A,E,E	0				0
152	38-39	IVF	5	3	2	E,E,A,E,A	0	0	0		1		1	0	1	0
153	<35	ICSI	0	0	0
154	<35	ICSI	3	2	1	E,E,A	1	0	1	0
155	35-37	ICSI	2	1	1	A,E	1	0	1	0
156	35-37	IVF	4	2	2	A,E,E,A	1	0	1	0
157	<35	IVF	5	5	0	E,E,E,E,E	1	0	1	0
158	38-39	ICSI	4	3	1	E,E,A,E	0	0	0		1		0				0
159	<35	IVF	4	3	1	A,E,E,E	1	0	1	0
160	35-37	ICSI	3	2	1	E,A,E	0	0	0		1		0
161	<35	ICSI	7	5	2	E,E,A,E,E,A,E	1	0	1	0
162	38-39	ICSI	7	3	4	E,A,A,E,A,A,E	0	0	0		1		1	1	0		1			0
163	<35	IVF	6	5	1	E,E,E,E,E,A	0	0	0		1		0				1			0				1	0				1	0
164	<35	ICSI	2	2	0	E,E	0	0	0		1		0
165	<35	ICSI	6	3	3	E,A,E,E,A,A	0	0	0		1		0				1			0
166	<35	ICSI	0	0	0
167	<35	IVF	4	3	1	E,E,A,E	1	0	1	0
168	35-37	IVF	4	3	1	E,E,A,E	0	0	0		1		0				1			0
169	<35	ICSI	4	2	2	A,A,E,E	0				1		0
170	38-39	ICSI	5	0	5	A,A,A,A,A
171	<35	ICSI	9	4	5	A,A,E,A,A,E,E,A,E	0				1		0				1			1	0	1	0
172	<35	ICSI	5	3	2	A,E,E,A,E	0				1		1	0	1	0
173	38-39	ICSI	0	0	0
174	<35	ICSI	3	1	2	A,E,A	0
175	<35	ICSI	0	0	0
176	35-37	IVF	3	2	1	E,E,A	0	0	0		1		1	0	1	0
177	<35	IVF	4	4	0	E,E,E,E	0	0	0		1		1	0	1	0
178	35-37	IVF	4	2	2	E,E,A,A	0	0	0		1		0
179	35-37	IVF	2	2	0	E,E	1	0	1	0
180	38-39	ICSI	7	4	3	E,E,A,A,A,E,E	0	0	0		1		0				1			1	0	1	0
181	<35	IVF	2	2	0	E,E	1	0	1	0
182	<35	ICSI	5	4	1	A,E,E,E,E	0				1		1	0	1	0
183	<35	IVF	5	3	2	A,A,E,E,E	1	0	1	0
184	35-37	ICSI	0	0	0
185	35-37	ICSI	3	2	1	E,E,A	1	0	1	0
186	<35	IVF	7	6	1	E,E,E,E,E,A,E	0	0	0		1		1	0	1	0
187	<35	ICSI	2	2	0	E,E	0	0	0		1		0
188	<35	IVF	4	2	2	E,A,E,A	0	0	0		1		0
189	<35	IVF	1	0	1	A
190	38-39	ICSI	0	0	0
191	35-37	ICSI	5	3	2	A,E,E,E,A	0				1		1	0	1	0
192	35-37	ICSI	5	4	1	E,E,A,E,A	0	0	0		1		1	0	1	0
193	38-39	IVF	2	1	1	A,E	0
194	<35	ICSI	9	7	2	A,E,E,E,E,E,A,E,E	0				1		0				1			1	0	1	0
195	<35	IVF	8	4	4	E,A,E,A,A,A,E,A	1	0	1	0
196	<35	IVF	0	0	0
197	<35	IVF	10	9	1	A,E,E,E,E,E,E,E,E,E	1	0	1	0
198	<35	IVF	8	7	1	E,E,E,A,E,E,E,E	0	0	0		1		1	0	1	0
199	<35	ICSI	11	5	6	A,E,A,A,E,E,A,E,A,E,A	0				1		0				1			0				1	1	0	1	0
200	35-37	ICSI	3	3	0	E,E,E	0	0	0		1		1	0	1	0
201	<35	ICSI	2	1	1	A,E	0
202	<35	ICSI	10	7	3	A,E,E,E,A,A,E,E,E,E	1	0	1	0
203	<35	ICSI	7	6	1	E,E,E,A,E,E,E	0	0	0		1		1	0	1	0
204	<35	ICSI	14	7	7	A,E,A,E,A,A,A,A,E,E,E,E,E,A	0				1		1	0	1	0
205	<35	ICSI	0	0	0
206	<35	ICSI	11	5	6	A,A,E,E,E,A,A,E,A,A,E	1	0	1	0
207	<35	ICSI	5	1	4	A,A,A,E,A	1	0	1	0
208	<35	IVF	7	6	1	E,E,E,E,E,A,E	1	0	1	0
209	35-37	IVF	4	2	2	E,A,A,E	1	0	1	0
210	35-37	ICSI	3	1	2	E,A,A	0	0	0
211	<35	IVF	5	4	1	A,E,E,E,E	0				1		0				1			0				1	0
212	35-37	IVF	8	5	3	A,E,E,E,E,E,A,A	0				1		1	0	1	0
213	<35	ICSI	0	0	0
214	<35	IVF	5	4	1	E,E,E,E,A	0	0	0		1		0				1			0				1	1	0	1	0
215	<35	IVF	9	5	4	A,E,E,A,A,E,E,A,E	1	0	1	1
216	<35	ICSI	12	9	3	E,E,A,E,E,A,E,E,E,E,A,E	1	0	1	0
217	35-37	ICSI	7	5	2	E,E,A,E,E,E,A	0	0	0		1		1	0	1	0
218	<35	ICSI	10	9	1	E,E,E,E,A,E,E,E,E,E	0	0	0		1		0				1			0				1	0				1	1	0	1	1
219	<35	IVF	11	5	6	A,A,E,E,E,E,A,E,A,A,A	1	0	1	0
220	35-37	IVF	11	8	3	A,A,E,E,A,E,E,E,E,E,E	1	0	1	0
221	38-39	ICSI	3	1	2	A,E,A	1	0	1	0	1
222	38-39	ICSI	1	0	1	A
223	<35	ICSI	5	4	1	E,E,E,A,E	1	1	0		1		0				1			1	0	1	0
224	<35	ICSI	0	0	0
225	35-37	ICSI	8	2	6	E,A,A,E,A,A,A,A	0	0	0		1		1	0	1	0
226	38-39	ICSI	4	3	1	A,E,E,E	0				1		0				1			1	0	1	0
227	35-37	ICSI	3	2	1	E,E,A	0	0	0		1		1	0	1	0
228	<35	ICSI	5	3	2	A,A,E,E,E	0				1		0				1			0
229	<35	ICSI	7	5	2	A,E,E,E,A,E,E	0				1		1	0	1	0
230	38-39	IVF	6	3	3	A,A,E,E,E,A	0				1		0				1			1	0	1	0
231	<35	ICSI	8	6	2	E,E,A,E,A,E,E,E	0	0	0		1		1	0	1	0
232	<35	ICSI	10	7	3	E,A,E,A,A,E,E,E,E,E	0	0	0		1		1	0	1	0
233	<35	IVF	9	7	2	A,E,A,E,E,E,E,E,E	0				1		0				1			0				1	0				1	0				1	1	0	1	0
234	<35	ICSI	2	2	0	E,E	0	0	0		1		0
235	<35	IVF	5	5	0	E,E,E,E,E	1	0	1	0
236	<35	ICSI	5	3	2	E,E,E,A,A	0	0	0		1		1	0	1	0
237	<35	IVF	5	3	2	E,A,E,E,A	1	0	1	0
238	<35	ICSI	5	4	1	E,A,E,E,E	0	0	0		1		0				1			0				1	1	0	1	0
239	35-37	IVF	5	3	2	A,E,A,E,E	1	0	1	0
240	35-37	IVF	2	2	0	E,E	0	0	0		1		0
241	<35	ICSI	7	6	1	E,E,E,E,A,E,E	1	0	1	0
242	38-39	IVF	6	4	2	A,E,E,A,E,E	1	0	1	0
243	<35	IVF	5	5	0	E,E,E,E,E	1	0	1	0
244	<35	ICSI	4	3	1	A,E,E,E	0				0	1	0
245	<35	IVF	0	0	0
246	<35	IVF	2	2	0	E,E	0	0	0		1		0
247	35-37	ICSI	6	3	3	E,A,A,A,E,E	1	0	1	0
248	<35	IVF	6	4	2	A,E,E,E,E,A	0				1		1	0	1	0
249	<35	ICSI	4	3	1	E,A,E,E	0	0	0		0	1	1	0	1	0
250	35-37	ICSI	2	2	0	E,E	1	0	1	0
251	38-39	IVF	3	1	2	A,A,E	0
252	38-39	ICSI	0	0	0
253	35-37	ICSI	2	2	0	E,E	1	1	0		1		1	0	1	0
254	<35	ICSI	2	2	0	E,E	0	0	0		1		1	0	1	0
255	<35	ICSI	5	4	1	E,E,A,E,E	0	0	0		1		0				1			0				1	0
256	<35	ICSI	4	1	3	A,A,E,A	1	0	1	0
257	<35	ICSI	4	3	1	E,A,E,E	0	0	0		1		0				1			0
258	35-37	IVF	4	3	1	A,E,E,E	0				1		1	0	1	0
259	<35	IVF	4	4	0	E,E,E,E	1	0	1	0
260	<35	ICSI	0	0	0
261	38-39	IVF	5	3	2	E,A,E,A,E	1	0	1	0
262	<35	ICSI	6	6	0	E,E,E,E,E,E	0	0	0		1		1	0	1	0
263	<35	IVF	3	2	1	A,E,E	1	1	0		1		0
264	<35	IVF	11	8	3	E,E,A,E,A,E,E,E,E,A,E	0	0	0		1		0				1			1	0	1	0
265	<35	ICSI	4	4	0	E,E,E,E	1	0	1	0
266	35-37	ICSI	1	1	0	E	0	0	0
267	<35	IVF	11	6	5	E,E,A,A,E,A,E,E,A,A,E	1	0	1	0
268	<35	ICSI	5	3	2	A,E,E,E,A	1	0	1	0
269	<35	ICSI	4	2	2	E,E,A,A	0	0	0		1		1	0	1	1
270	38-39	ICSI	7	3	4	A,E,E,E,A,A,A	0				1		1	0	1	0
271	35-37	IVF	4	4	0	E,E,E,E	0	0	0		1		0				1			1	0	1	0
272	<35	ICSI	4	1	3	A,E,A,A	1	0	1	0
273	<35	ICSI	0	0	0
274	<35	ICSI	0	0	0
275	<35	IVF	7	6	1	A,E,E,E,E,E,E	0				1		0				1			0				1	1	0	1	0
276	<35	ICSI	9	7	2	E,A,E,E,E,E,A,E,E	0	0	0		1		0				1			0				1	1	0	1	0
277	35-37	ICSI	6	3	3	E,E,E,A,A,A	0	0	0		1		1	0	1	0
278	35-37	IVF	3	1	2	A,E,A	1	0	1	0
279	<35	ICSI	4	3	1	E,E,E,A	1	0	1	0
280	<35	Aban	0	0	0
281	<35	ICSI	7	6	1	A,E,E,E,E,E,E	1	0	1	0
282	<35	ICSI	7	5	2	E,E,E,A,A,E,E	1	1	0		1		1	0	1	0
283	<35	ICSI	9	3	6	E,A,A,A,A,E,E,A,A	1	1	0		1		0				1			0
284	<35	ICSI	8	8	0	E,E,E,E,E,E,E,E	0	0	0		1		0				1			0				1	0				1	0				1	0				1	0				1	1	0	1	0
285	<35	ICSI	2	1	1	A,E	1	0	1	0
286	38-39	ICSI	1	0	1	A
287	<35	IVF	9	7	2	E,A,E,E,E,E,E,A,E	1	0	1	0
288	38-39	ICSI	12	2	10	A,A,A,A,A,A,E,E,A,A,A,A	1	0	1	0
289	<35	ICSI	8	3	5	A,A,E,A,E,A,A,E	0				1		1	0	1	0
290	35-37	ICSI	2	1	1	A,E	0
291	38-39	ICSI	1	1	0	E	1	0	1	0
292	<35	ICSI	5	3	2	E,A,E,A,E	0	0	0		1		0				1			0
293	35-37	ICSI	7	6	1	A,E,E,E,E,E,E	0				1		0				1			0				1	0				1	0				1	0
294	35-37	IVF	3	1	2	A,A,E	0
295	35-37	IVF	4	3	1	E,E,A,E	0	0	0		1		0				1			0
296	35-37	ICSI	0	0	0
297	<35	ICSI	8	6	2	E,E,E,A,E,E,A,E	1	0	1	0
298	<35	ICSI	4	2	2	E,E,A,A	0	0	0		1		0
299	<35	IVF	5	5	0	E,E,E,E,E	0	0	0		1		0				1			0				1	0				1	1	0	1	0
300	38-39	ICSI	4	2	2	E,A,E,A	1	0	1	0
301	35-37	ICSI	10	8	2	E,E,E,E,E,A,E,A,E,E	0	0	0		0	1	0				0	1		0				1	1	0	1	0
302	<35	Aban	0	0	0
303	<35	IVF	0	0	0
304	<35	ICSI	5	4	1	E,E,E,A,E	1	0	1	0
305	35-37	ICSI	3	3	0	E,E,E	1	0	1	0
306	<35	ICSI	4	3	1	A,E,E,E	0				1		1	0	1	0
307	<35	ICSI	2	1	1	A,E	1	0	1	0
308	<35	ICSI	3	2	1	E,A,E	1	0	1	0
309	35-37	ICSI	5	1	4	A,A,A,E,A	0
310	38-39	ICSI	4	3	1	E,E,E,A	0	0	0		0	1	0
311	<35	IVF	3	1	2	A,A,E	1	0	1	0
312	<35	ICSI	0	0	0
313	<35	ICSI	3	3	0	E,E,E	0	0	0		1		1	0	1	0
314	35-37	ICSI	2	1	1	E,A	0	0	0
315	<35	ICSI	4	4	0	E,E,E,E	0	0	0		1		0				1			0				1	0
316	35-37	ICSI	8	5	3	E,E,A,A,E,A,E,E	0	0	0		1		0				1			1	0	1	0
317	<35	ICSI	7	7	0	E,E,E,E,E,E,E	1	0	1	0
318	<35	IVF	9	7	2	E,E,A,E,A,E,E,E,E	0	0	0		1		0				1			0				1	1	0	1	0
319	<35	ICSI	9	7	2	E,E,E,E,E,A,A,E,E	0	0	0		1		0				0	1		0				1	0				1	0				1	1	0	1	0
320	<35	ICSI	11	7	4	E,E,E,A,A,E,A,E,E,A,E	0	0	0		1		0				1			1	0	1	0
321	<35	ICSI	11	7	4	E,E,E,A,E,E,A,A,A,E,E	1	0	1	0
322	<35	Aban	0	0	0
323	<35	ICSI	3	2	1	E,E,A	1	0	1	0
324	<35	IVF	5	4	1	E,E,E,A,E	0	0	0		1		0				1			0				1	0
325	<35	IVF	2	2	0	E,E	1	0	1	0
326	<35	IVF	3	1	2	E,A,A	0	0	0
327	<35	ICSI	4	2	2	A,E,E,A	0				1		0
328	38-39	Aban	0	0	0
329	<35	ICSI	7	4	3	A,E,A,E,A,E,E	0				0	1	0				1			1	0	1	0
330	<35	IVF	0	0	0
331	35-37	ICSI	3	2	1	A,E,E	0				1		0
332	35-37	ICSI	6	4	2	E,E,A,E,E,A	0	0	0		1		0				1			1	0	1	0
333	<35	IVF	8	7	1	E,E,E,E,E,A,E,E	0	0	0		1		1	0	1	0
334	<35	ICSI	2	1	1	E,A	1	0	1	0
335	<35	IVF	4	3	1	E,E,A,E	0	0	0		1		0				1			0
336	<35	ICSI	9	5	4	A,E,E,A,A,E,E,A,E	0				1		1	0	1	0
337	<35	ICSI	4	1	3	A,E,A,A	0
338	<35	ICSI	5	4	1	E,E,E,A,E	1	0	1	0
339	<35	ICSI	11	8	3	E,E,A,E,E,A,A,E,E,E,E	0	0	0		0	1	0				1			0				1	0				1	1	0	1	0
340	<35	ICSI	6	1	5	E,A,A,A,A,A	1	0	1	0
341	38-39	IVF	2	0	2	A,A
342	<35	ICSI	0	0	0
343	<35	IVF	0	0	0
344	35-37	ICSI	5	3	2	A,E,E,E,A	0				1		0				1			0
345	<35	ICSI	9	4	5	E,E,E,A,A,A,E,A,A	0	0	0		1		1	0	1	0
346	38-39	IVF	7	5	2	E,E,E,E,A,A,E	1	0	1	0
347	<35	ICSI	9	6	3	E,E,A,E,A,A,E,E,A	0	0	0		1		0				1			0				1	1	0	1	0
348	<35	ICSI	5	4	1	E,E,E,A,E	0	0	0		1		1	0	1	0
349	35-37	ICSI	0	0	0
350	<35	ICSI	0	0	0
351	<35	Aban	0	0	0
352	35-37	ICSI	2	2	0	E,E	1	0	1	0
353	<35	ICSI	0	0	0
354	38-39	ICSI	1	1	0	E	0	0	0
355	35-37	IVF	0	0	0
356	<35	ICSI	4	3	1	A,E,E,E	0				1		0				1			0				1	1	0	1	0
357	38-39	IVF	8	7	1	E,E,E,E,E,E,E,A	0	0	0		1		0				1			0				1	1	0	1	0
358	35-37	IVF	4	1	3	A,A,A,E	0
359	35-37	IVF	0	0	0
360	<35	ICSI	4	2	2	A,A,E,E	1	0	1	0
361	<35	ICSI	4	2	2	E,A,E,A	0	0	0		1		0
362	<35	ICSI	4	4	0	E,E,E,E	0	0	0		1		0				1			0				1	1	0	1	0
363	<35	IVF	4	3	1	E,A,E,E	0	0	0		1		0				1			0
364	<35	ICSI	7	6	1	E,E,E,A,E,E,E	0	0	0		1		0				1			0				1	0				1	1	1	0		1	1	0	1	0
365	35-37	IVF	0	0	0
366	<35	ICSI	0	0	0
367	38-39	ICSI	7	4	3	E,E,A,A,A,E,E	0	0	0		1		1	0	1	0
368	<35	IVF	6	5	1	A,E,E,E,E,E	1	0	1	0
369	<35	ICSI	2	1	1	A,E	0
370	<35	ICSI	6	3	3	A,E,A,A,E,E	1	0	1	0
371	<35	IVF	5	3	2	E,E,A,A,E	1	0	1	0
372	<35	ICSI	3	1	2	E,A,A	0	0	0
373	38-39	ICSI	7	3	4	A,A,A,A,E,E,E	0				1		0				1			0
374	<35	ICSI	5	5	0	E,E,E,E,E	1	0	1	0
375	35-37	ICSI	2	1	1	A,E	0
376	<35	IVF	3	3	0	E,E,E	1	0	1	0
377	<35	IVF	1	0	1	A
378	<35	IVF	2	1	1	E,A	1	0	1	0
379	<35	ICSI	3	1	2	A,A,E	1	0	1	0
380	38-39	IVF	2	0	2	A,A
381	<35	ICSI	7	3	4	E,E,A,A,E,A,A	0	0	0		1		1	0	1	0
382	<35	IVF	4	4	0	E,E,E,E	0	0	0		1		0				1			1	0	1	0
383	35-37	IVF	1	1	0	E	0	0	0
384	35-37	IVF	4	2	2	A,E,E,A	0				1		1	0	1	0
385	<35	ICSI	6	5	1	E,E,E,A,E,E	1	0	1	0
386	<35	IVF	0	0	0
387	<35	IVF	4	2	2	E,E,A,A	0	0	0		0
388	<35	ICSI	0	0	0
389	35-37	ICSI	14	10	4	E,E,E,E,E,A,A,A,E,E,E,E,A,E	1	1	0		1		0				1			1	0	1	0
390	<35	ICSI	3	2	1	E,A,E	1	0	1	0
391	<35	ICSI	5	3	2	E,A,A,E,E	1	0	1	0
392	<35	ICSI	9	5	4	E,E,A,E,A,A,E,A,E	0	0	0		1		0				1			1	0	1	0
393	<35	ICSI	3	2	1	A,E,E	0				1		1	0	1	0
394	<35	ICSI	5	5	0	E,E,E,E,E	0	0	0		1		0				1			1	0	1	1
395	<35	ICSI	9	7	2	E,E,E,E,E,A,A,E,E	1	1	0		1		1	0	1	0
396	<35	ICSI	5	5	0	E,E,E,E,E	1	0	1	0
397	<35	IVF	7	5	2	A,A,E,E,E,E,E	1	0	1	0
398	<35	ICSI	5	3	2	E,E,A,E,A	1	0	1	0
399	<35	ICSI	8	5	3	A,A,E,E,A,E,E,E	0				1		1	0	1	0
400	35-37	IVF	4	1	3	E,A,A,A	1	0	1	0
401	35-37	ICSI	5	4	1	E,E,E,A,E	0	0	0		1		0				1			0				1	0
402	<35	ICSI	4	4	0	E,E,E,E	0	0	0		1		0				1			1	0	1	0
403	<35	IVF	6	4	2	E,A,A,E,E,E	0	0	0		1		1	0	1	0
404	<35	ICSI	0	0	0
405	<35	ICSI	13	11	2	E,E,E,E,E,E,E,E,A,E,A,E,E	1	0	1	0
406	<35	ICSI	5	1	4	A,E,A,A,A	0
407	<35	IVF	3	3	0	E,E,E	0	0	0		1		0				1			0
408	35-37	ICSI	7	3	4	E,E,A,E,A,A,A	1	0	1	0
409	35-37	IVF	9	4	5	E,A,A,A,E,A,E,A,E	1	0	1	0
410	<35	IVF	2	1	1	A,E	1	1	0
411	<35	ICSI	4	3	1	E,E,A,E	0	0	0		1		0				1			1	0	1	0
412	35-37	ICSI	2	2	0	E,E	0	0	0		1		0
413	<35	ICSI	4	3	1	A,E,E,E	0				1		0				1			1	0	1	0
414	<35	ICSI	4	4	0	E,E,E,E	1	0	1	0
415	<35	ICSI	4	2	2	E,A,E,A	1	0	1	0
416	38-39	ICSI	0	0	0
417	35-37	ICSI	3	2	1	A,E,E	0				1		0
418	35-37	ICSI	5	2	3	A,E,A,A,E	0				1		0
419	<35	ICSI	5	3	2	E,A,E,A,E	0	0	0		1		1	0	1	0
420	<35	IVF	8	7	1	E,E,E,E,E,E,E,A	0	0	0		1		1	0	1	0
421	35-37	ICSI	4	2	2	A,A,E,E	0				0
422	<35	IVF	2	1	1	A,E	0
423	<35	IVF	8	6	2	A,E,E,E,A,E,E,E	1	0	1	0
424	<35	IVF	0	0	0
425	<35	IVF	2	1	1	A,E	1	0	1	0
426	35-37	IVF	14	8	6	E,A,A,E,A,E,A,A,E,E,E,E,E,A	0	0	0		1		0				1			1	0	1	0
427	<35	IVF	5	4	1	E,E,A,E,E	0	0	0		1		1	0	1	0
428	<35	ICSI	5	4	1	E,E,E,A,E	0	0	0		1		0				1			1	1	0		1	0
429	<35	ICSI	3	2	1	A,E,E	1	0	1	0
430	<35	ICSI	4	2	2	A,E,A,E	1	0	1	0
431	<35	ICSI	3	2	1	E,A,E	1	0	1	0
432	<35	ICSI	6	6	0	E,E,E,E,E,E	1	0	1	0
433	<35	ICSI	2	2	0	E,E	0	0	0		0
434	<35	ICSI	7	4	3	E,E,E,A,A,E,A	0	0	0		1		0				1			1	0	1	0
435	<35	ICSI	11	8	3	E,E,A,A,E,E,E,E,E,A,E	0	0	0		1		0				1			0				1	1	0	1	0
436	35-37	IVF	2	2	0	E,E	0	0	0		1		0
437	<35	IVF	3	2	1	A,E,E	0				1		1	0	1	0
438	<35	IVF	6	4	2	A,A,E,E,E,E	1	0	1	0
439	<35	ICSI	4	4	0	E,E,E,E	0	0	0		1		0				0	0
440	<35	IVF	2	2	0	E,E	1	0	1	0
441	<35	IVF	4	3	1	E,E,E,A	0	0	0		1		1	0	1	0
442	35-37	ICSI	5	4	1	E,E,A,E,E	1	0	1	0
443	<35	ICSI	0	0	0
444	38-39	ICSI	7	4	3	E,E,A,E,A,A,E	1	0	1	0
445	35-37	ICSI	5	3	2	A,E,E,A,E	1	0	1	0
446	<35	ICSI	9	6	3	E,E,E,A,E,A,A,E,E	1	0	1	0
447	38-39	ICSI	4	2	2	A,A,E,E	1	0	1	0
448	<35	ICSI	10	4	6	E,E,A,E,A,E,A,A,A,A	0	0	0		1		0				1			1	0	1	0
449	35-37	ICSI	5	3	2	E,E,A,E,A	1	0	1	0
450	35-37	ICSI	6	4	2	A,A,E,E,E,E	1	0	1	0
451	35-37	ICSI	0	0	0
452	35-37	ICSI	8	6	2	E,E,E,A,A,E,E,E	0	0	0		1		1	0	1	0
453	35-37	ICSI	5	2	3	E,A,A,E,A	1	0	1	0
454	35-37	ICSI	4	3	1	E,E,E,A	0	0	0		1		1	0	1	0
455	<35	IVF	4	2	2	A,A,E,E	0				1		0
456	<35	ICSI	4	3	1	E,E,E,A	0	0	0		1		0				1			0
457	<35	ICSI	6	5	1	E,E,A,E,E,E	0	0	0		1		1	0	1	0
458	<35	IVF	5	1	4	A,A,E,A,A	1	0	1	0
459	35-37	IVF	7	5	2	E,E,E,A,E,E,A	0	0	0		1		1	1	0		1			1	0	1	0
460	<35	ICSI	13	10	3	E,E,E,A,E,A,E,A,E,E,E,E	1	1	0		1		1	0	1	0
461	38-39	ICSI	2	0	2	A,A
462	<35	ICSI	2	1	1	A,E	0
463	35-37	ICSI	1	1	0	E	1	0	1	0
464	<35	ICSI	11	8	3	E,E,E,E,A,A,E,E,E,A,E	1	0	1	0
465	35-37	ICSI	0	0	0
466	35-37	ICSI	2	1	1	A,E	1	0	1	0
467	<35	ICSI	7	7	0	E,E,E,E,E,E,E	0	0	0		0	1	0				1			0				1	0				1	0				1	1	0	1	0
468	35-37	ICSI	3	3	0	E,E,E	1	0	1	0
469	<35	IVF	5	3	2	E,E,A,E,A	0	0	0		1		1	0	1	0
470	35-37	IVF	5	4	1	A,E,E,E,E	1	0	1	0
471	<35	ICSI	2	2	0	E,E	0	0	0		1		0
472	<35	ICSI	2	2	0	E,E	0	0	0		1		1	0	1	0
473	38-39	IVF	2	0	2	A,A
474	<35	ICSI	5	3	2	A,E,A,E,A	1	0	1	0
475	<35	ICSI	5	4	1	E,E,E,E,A	0	0	0		1		0				1			1	0	1	0
476	<35	IVF	5	5	0	E,E,E,E,E	0	0	0		0	1	0				1			1	0	1	0
477	<35	ICSI	7	6	1	E,E,E,A,E,E,E	1	0	1	0
478	35-37	ICSI	3	3	0	E,E,E	1	0	1	0
479	<35	Aban	0	0	0
480	<35	ICSI	4	4	0	E,E,E,E	0	0	0		1		0				0	1		1	0	1	0
481	<35	ICSI	7	7	0	E,E,E,E,E,E,E	0	0	0		1		1	0	1	0
482	<35	IVF	3	3	0	E,E,E	0	0	0		0	1	0
483	<35	IVF	4	2	2	E,A,E,A	0	0	0		1		0
484	<35	ICSI	6	6	0	E,E,E,E,E,E	0	0	0		1		0				1			0				1	1	0	1	0
485	<35	ICSI	2	2	0	E,E	0	0	0		1		1	0	1	0
486	<35	ICSI	6	3	3	E,A,A,E,E,A	0	0	0		1		1	0	1	0
487	<35	ICSI	0	0	0
488	<35	ICSI	2	2	0	E,E	1	0	1	0
489	35-37	ICSI	6	3	3	E,E,A,A,E,A	1	0	1	0
490	<35	ICSI	3	2	1	A,E,E	1	0	1	0
491	35-37	IVF	0	0	0
492	<35	ICSI	1	1	0	E	1	1	0
493	<35	ICSI	7	6	1	E,E,E,E,E,E,A	1	0	1	0
494	35-37	IVF	4	2	2	E,E,A,A	0	0	0		1		1	0	1	0
495	<35	ICSI	6	5	1	E,E,E,E,E,A	0	0	0		1		0				1			0				1	0				1	1	0	1	0
496	35-37	ICSI	6	3	3	E,A,E,A,A,E	1	0	1	0
497	38-39	ICSI	5	2	3	A,A,E,A,E	0				1		1	0	1	0
498	<35	IVF	5	3	2	E,A,E,E,A	1	0	1	0
499	<35	ICSI	6	4	2	E,E,A,A,E,E	1	0	1	0
500	35-37	ICSI	4	4	0	E,E,E,E	0	0	0		1		0				1			1	0	1	0
501	<35	IVF	4	3	1	E,E,E,A	0	0	0		1		1	0	1	0
502	<35	IVF	8	5	3	E,A,E,E,A,A,E,E	1	0	1	0
503	<35	ICSI	6	4	2	E,E,A,E,E,A	1	0	1	0
504	<35	ICSI	5	4	1	E,E,E,E,A	0	0	0		1		0				1			0				1	0
505	<35	ICSI	9	7	2	E,A,E,E,A,E,E,E,E	0	0	0		1		1	0	1	0
506	<35	ICSI	9	6	3	E,E,A,E,E,A,A,E,E	0	0	0		1		1	0	1	0
507	<35	ICSI	5	5	0	E,E,E,E,E	0	0	0		1		0				1			1	0	1	0
508	<35	IVF	7	7	0	E,E,E,E,E,E,E	0	0	0		1		0				0	1		1	0	1	0
509	35-37	ICSI	6	5	1	E,A,E,E,E,E	0	0	0		1		1	0	1	0
510	<35	ICSI	7	5	2	E,E,A,A,E,E,E	1	0	1	0
511	<35	IVF	5	5	0	E,E,E,E,E	1	0	1	0
512	<35	ICSI	0	0	0
513	35-37	ICSI	4	4	0	E,E,E,E	0	0	0		1		1	0	1	0
514	<35	ICSI	0	0	0
515	<35	ICSI	7	5	2	E,A,A,E,E,E,E	0	0	0		1		1	0	1	0
516	35-37	IVF	1	1	0	E	0	0	0
517	<35	ICSI	4	4	0	E,E,E,E	0	0	0		1		1	0	1	0
518	<35	IVF	3	3	0	E,E,E	1	0	1	0
519	<35	ICSI	4	4	0	E,E,E,E	0	0	0		1		1	0	1	0
520	<35	Aban	0	0	0
521	38-39	ICSI	4	3	1	E,E,A,E	0	0	0		1		0				1			1	0	1	0
522	<35	IVF	4	3	1	E,E,A,E	0	0	0		1		0				1			1	0	1	0
523	<35	IVF	2	1	1	A,E	1	0	1	0
524	35-37	IVF	1	1	0	E	1	0	1	0
525	<35	ICSI	4	3	1	A,E,E,E	1	0	1	0
526	38-39	IVF	1	0	1	A
527	<35	ICSI	0	0	0
528	<35	ICSI	4	3	1	E,E,E,A	0	0	0		1		0				1			0
529	<35	ICSI	4	3	1	E,E,A,E	1	0	1	0
530	<35	IVF	5	4	1	E,E,A,E,E	1	1	0		1		0				1			0				1	1	0	1	0
531	38-39	ICSI	2	0	2	A,A
532	35-37	ICSI	3	1	2	A,A,E	0
533	35-37	IVF	6	3	3	E,A,A,A,E,E	1	0	1	0
534	<35	ICSI	0	0	0
535	<35	IVF	8	6	2	E,A,E,E,E,E,A,E	0	0	0		1		1	0	1	0
536	<35	ICSI	4	2	2	A,A,E,E	0				1		1	0	1	0
537	38-39	IVF	7	4	3	E,E,A,E,A,A,E	0	0	0		1		1	0	1	0
538	35-37	ICSI	0	0	0
539	<35	ICSI	4	2	2	E,A,E,A	1	0	1	0
540	<35	IVF	11	8	3	E,E,A,E,E,E,A,E,E,A,E	1	0	1	0
541	35-37	IVF	6	3	3	A,E,E,A,A,E	0				1		0				1			0
542	38-39	ICSI	2	1	1	E,A	0	0	0
543	<35	ICSI	5	3	2	E,E,A,A,E	1	0	1	0
544	<35	ICSI	11	9	2	A,E,E,E,E,E,A,E,E,E,E	1	0	1	0
545	38-39	ICSI	3	2	1	A,E,E	0				1		1	0	1	0
546	38-39	ICSI	1	1	0	E	1	0	1	0
547	<35	ICSI	2	2	0	E,E	0	0	0		1		0
548	<35	ICSI	6	4	2	E,A,E,E,E,A	0	0	0		1		0				1			1	0	1	0
549	<35	ICSI	7	5	2	A,E,E,E,E,A,E	0				1		1	0	1	0
550	<35	ICSI	9	8	1	E,E,E,E,E,E,E,E,A	1	1	0		1		1	0	1	0
551	<35	ICSI	6	4	2	E,E,E,E,A,A	0	0	0		1		0				1			1	0	1	0
552	35-37	IVF	1	1	0	E	0	0	0
553	<35	ICSI	4	3	1	E,E,A,E	0	0	0		1		0				1			1	0	1	0
554	<35	IVF	4	3	1	E,A,E,E	0	0	0		0	1	1	0	1	0
555	<35	IVF	4	1	3	A,A,A,E	0
556	38-39	IVF	4	2	2	E,A,A,E	1	0	1	0
557	<35	ICSI	5	2	3	E,A,E,A,A	1	0	1	0
558	35-37	IVF	14	9	5	A,A,E,A,E,A,E,E,A,E,E,E,E,E	0				1		1	0	1	0
559	<35	ICSI	2	2	0	E,E	0	0	0		1		0
560	<35	ICSI	2	2	0	E,E	0	0	0		1		1	0	1	0
561	<35	ICSI	2	2	0	E,E	1	1	0		1		0
562	35-37	ICSI	4	3	1	E,E,E,A	1	0	1	0
563	35-37	ICSI	3	3	0	E,E,E	1	0	1	0
564	38-39	IVF	2	2	0	E,E	1	0	1	0
565	<35	ICSI	7	6	1	E,A,E,E,E,E,E	0	0	0		1		1	0	1	0
566	<35	IVF	2	2	0	E,E	0	0	0		1		0
567	<35	ICSI	5	3	2	A,A,E,E,E	1	0	1	0
568	35-37	ICSI	7	4	3	A,E,E,A,E,A,A	1	0	1	0
569	<35	ICSI	0	0	0
570	<35	ICSI	4	1	3	E,A,A,A	1	0	1	0
571	35-37	ICSI	4	2	2	E,A,A,E	0	0	0		1		1	1	0	0
572	<35	ICSI	7	5	2	E,A,E,E,E,A,E	0	0	0		1		0				1			0				1	1	0	1	0
573	<35	IVF	6	4	2	E,E,E,E,A,A	1	0	1	0
574	<35	ICSI	9	7	2	A,E,A,E,E,E,E,E,E	0				0	1	0				0	0	1	0				1	1	0	1	0
575	35-37	IVF	5	3	2	A,A,E,E,E	0				1		1	0	1	0
576	<35	IVF	4	2	2	E,E,A,A	0	0	0		1		0
577	<35	ICSI	9	8	1	E,E,E,E,E,A,E,E,E	0	0	0		0	1	0				1			1	0	1	0
578	<35	IVF	7	7	0	E,E,E,E,E,E,E	1	0	1	0
579	35-37	ICSI	0	0	0
580	35-37	ICSI	10	5	5	E,A,E,A,E,E,A,A,E,A	0	0	0		0	1	1	0	1	0
581	<35	IVF	10	10	0	E,E,E,E,E,E,E,E,E,E	0	0	0		1		1	0	1	0
582	<35	IVF	0	0	0
583	<35	IVF	8	5	3	E,A,E,E,A,E,E,A	0	0	0		1		0				1			0				1	1	0	1	0
584	38-39	IVF	5	3	2	E,A,E,E,A	0	0	0		1		1	0	1	0
585	35-37	IVF	4	2	2	E,E,A,A	0	0	0		1		1	0	1	0
586	<35	ICSI	5	4	1	E,E,E,E,A	1	0	1	0
587	<35	ICSI	0	0	0
588	<35	IVF	12	8	4	A,E,E,E,E,E,E,A,A,E,E,A	1	0	1	0
589	35-37	IVF	6	3	3	E,E,A,A,E,A	0	0	0		1		1	0	1	0
590	<35	IVF	2	1	1	E,A	1	0	1	0
591	38-39	ICSI	0	0	0
592	<35	ICSI	0	0	0
593	<35	ICSI	3	3	0	E,E,E	0	0	0		1		0				1			0
594	38-39	IVF	0	0	0
595	<35	ICSI	7	6	1	A,E,E,E,E,E,E	0				1		1	0	1	0
596	<35	ICSI	2	2	0	E,E	0	0	0		1		1	0	1	0
597	35-37	ICSI	5	4	1	A,E,E,E,E	1	0	1	0
598	35-37	ICSI	0	0	0
599	<35	ICSI	5	3	2	E,E,E,A,A	1	0	1	0
600	<35	IVF	5	3	2	A,E,E,A,E	1	0	1	0
601	38-39	ICSI	2	1	1	A,E	1	0	1	0
602	<35	Aban	0	0	0
603	<35	ICSI	9	5	4	A,E,A,E,E,A,E,E,A	0				0	1	0				1			0				1	0
604	<35	ICSI	0	0	0
605	<35	IVF	8	3	5	A,A,A,E,E,A,E,A	1	0	1	0
606	<35	ICSI	3	2	1	A,E,E	0				1		0
607	38-39	ICSI	2	1	1	E,A	1	1	0
608	<35	ICSI	5	4	1	E,E,E,A,E	1	1	0		1		0				1			0				1	0
609	<35	ICSI	5	5	0	E,E,E,E,E	0	0	0		1		1	0	1	0
610	35-37	ICSI	1	1	0	E	0	0	0
611	<35	IVF	3	2	1	E,E,A	0	0	0		1		1	0	1	0
612	38-39	ICSI	2	0	2	A,A
613	35-37	ICSI	6	2	4	E,A,A,A,E,A	0	0	0		1		1	0	1	0
614	<35	ICSI	5	3	2	A,E,E,E,A	1	0	1	0
615	<35	IVF	3	3	0	E,E,E	0	0	0		1		1	0	1	0
616	<35	ICSI	9	4	5	E,A,A,E,E,A,A,A,E	1	0	1	0
617	<35	IVF	5	2	3	A,A,A,E,E	1	0	1	0
618	35-37	ICSI	1	1	0	E	1	0	1	0
619	35-37	ICSI	2	2	0	E,E	0	0	0		1		1	0	1	0
620	38-39	ICSI	0	0	0
621	<35	ICSI	10	7	3	E,A,A,E,E,E,E,E,A,E	0	0	0		1		0				1			0				1	0				1	0				1	0				1	1	0	1	0
622	38-39	ICSI	7	3	4	A,E,E,A,A,E,A	1	1	0		1		1	0	1	0
623	<35	ICSI	4	4	0	E,E,E,E	1	0	1	0
624	35-37	ICSI	1	0	1	A
625	35-37	IVF	4	3	1	A,E,E,E	1	0	1	0
626	35-37	ICSI	3	2	1	E,A,E	0	0	0		1		1	0	1	0
627	35-37	ICSI	4	1	3	A,A,E,A	0
628	<35	ICSI	7	6	1	E,E,E,E,A,E,E	1	0	1	0
629	<35	IVF	5	4	1	A,E,E,E,E	0				1		0				1			0				1	0
630	<35	ICSI	5	4	1	E,E,E,E,A	0	0	0		1		0				1			0				1	0
631	35-37	ICSI	2	0	2	A,A
632	38-39	ICSI	5	4	1	A,E,E,E,E	1	0	1	0
633	<35	IVF	5	3	2	A,E,E,A,E	0				1		1	0	1	0
634	<35	IVF	11	7	4	E,E,A,E,E,E,E,A,E,A,A	1	0	1	0
635	<35	ICSI	7	3	4	E,E,A,A,E,A,A	0	0	0		1		0				1			0
636	35-37	ICSI	5	4	1	E,A,E,E,E	1	0	1	0
637	<35	ICSI	4	3	1	E,A,E,E	0	0	0		1		1	0	1	0
638	35-37	ICSI	1	1	0	E	1	0	1	0
639	<35	IVF	8	8	0	E,E,E,E,E,E,E,E	0	0	0		1		0				1			0				1	1	0	1	0
640	<35	ICSI	5	3	2	E,A,E,A,E	1	0	1	0
641	<35	ICSI	0	0	0
642	<35	ICSI	9	8	1	E,E,E,A,E,E,E,E,E	0	0	0		1		0				1			0				1	1	0	1	0
643	<35	ICSI	0	0	0
644	<35	ICSI	11	6	5	E,E,E,A,E,A,A,E,A,A,E	1	0	1	0
645	<35	ICSI	5	5	0	E,E,E,E,E	0	0	0		1		1	0	1	0
646	<35	ICSI	3	2	1	E,E,A	1	0	1	0
647	<35	ICSI	10	9	1	E,E,E,E,E,E,E,A,E,E	0	0	0		1		0				1			0				1	0				1	0				1	0				1	1	0	1	0
648	38-39	ICSI	2	0	2	A,A
649	<35	ICSI	11	9	2	E,E,A,E,E,E,E,E,E,A,E	0	0	0		1		1	0	1	0
650	<35	IVF	4	3	1	E,E,E,A	1	1	0		1		0				1			1	0	1	0
651	35-37	ICSI	1	1	0	E	0	0	0
652	<35	ICSI	3	2	1	E,E,A	0	0	0		1		0
653	<35	IVF	7	4	3	E,A,A,E,E,A,E	1	0	1	0
654	<35	ICSI	9	8	1	E,A,E,E,E,E,E,E,E	1	0	1	0
655	<35	ICSI	5	2	3	A,E,E,A,A	1	0	1	0
656	<35	IVF	4	4	0	E,E,E,E	1	0	1	0
657	<35	IVF	7	6	1	E,E,E,E,E,E,A	0	0	0		1		1	0	1	0
658	<35	ICSI	5	5	0	E,E,E,E,E	0	0	0		1		1	0	1	0
659	<35	ICSI	2	2	0	E,E	0	0	0		1		1	0	1	0
660	<35	ICSI	5	4	1	E,E,E,A,E	0	0	0		1		0				1			0				0
661	<35	ICSI	9	6	3	E,E,E,A,E,A,E,A,E	1	0	1	0
662	35-37	ICSI	4	4	0	E,E,E,E	1	0	1	0
663	<35	IVF	6	5	1	E,E,A,E,E,E	0	0	0		1		1	0	1	0
664	38-39	ICSI	4	3	1	A,E,E,E	1	0	1	0
665	38-39	ICSI	0	0	0
666	<35	ICSI	7	4	3	E,E,A,A,A,E,A	1	0	1	0
667	<35	IVF	4	3	1	E,E,A,E	0	0	0		1		1	0	1	0
668	<35	ICSI	9	6	3	E,E,E,A,E,A,E,A,E	0	0	0		1		1	0	1	0
669	35-37	IVF	6	3	3	A,E,E,E,A,A	1	0	1	0
670	<35	ICSI	4	2	2	E,A,A,E	0	0	0		1		0
671	35-37	ICSI	2	2	0	E,E	0	0	0		1		0
672	<35	ICSI	4	4	0	E,E,E,E	0	0	0		1		0				1			1	0	1	0
673	<35	IVF	7	3	4	E,E,A,A,A,E,A	0	0	0		1		0				1			1	0	1	0
674	<35	IVF	4	2	2	E,A,E,A	0	0	0		1		0
675	<35	ICSI	0	0	0
676	38-39	ICSI	0	0	0
677	<35	IVF	3	3	0	E,E,E	0	0	0		1		1	0	1	0
678	<35	ICSI	5	2	3	E,A,A,A,E	0	0	0		1		0
679	<35	IVF	1	1	0	E	0	0	0
680	38-39	ICSI	0	0	0
681	<35	ICSI	2	1	1	A,E	1	0	1	0
682	<35	ICSI	0	0	0
683	<35	ICSI	2	1	1	A,E	1	0	1	0
684	<35	IVF	4	1	3	A,A,E,A	1	0	1	0
685	<35	IVF	4	3	1	E,E,E,A	1	0	1	0
686	<35	ICSI	0	0	0
687	<35	ICSI	3	3	0	E,E,E	1	0	1	0
688	38-39	ICSI	4	0	4	A,A,A,A
689	38-39	ICSI	0	0	0
690	35-37	ICSI	9	1	8	A,A,A,E,A,A,A,A,A	0
691	<35	ICSI	5	3	2	A,E,A,E,A	0				1		0
692	<35	IVF	9	7	2	E,E,E,A,E,E,A,E,E	1	0	1	0
693	<35	ICSI	0	0	0
694	<35	IVF	6	4	2	E,E,A,E,A,E	1	0	1	0
695	38-39	ICSI	9	8	1	E,E,A,E,E,E,E,E,E	1	0	1	0
696	<35	ICSI	3	1	2	A,E,A	1	0	1	0
697	<35	ICSI	2	2	0	E,E	0	0	0		1		1	0	1	0
698	<35	ICSI	6	5	1	E,A,E,E,E,E	1	0	1	0
699	<35	ICSI	6	4	2	E,E,A,E,E,A	1	0	1	0
700	35-37	ICSI	2	1	1	E,A	0	0	0
701	<35	ICSI	6	2	4	A,A,A,E,E,A	0				1		1	0	1	0
702	<35	IVF	5	4	1	E,E,E,A,E	1	0	1	0
703	38-39	ICSI	1	0	1	A
704	38-39	ICSI	7	3	4	A,A,A,A,E,E,E	1	0	1	0
705	<35	ICSI	9	8	1	E,E,E,E,E,E,A,E,E	1	0	1	0
706	35-37	ICSI	6	1	5	A,A,A,E,A,A	0
707	<35	IVF	7	6	1	E,E,E,E,A,E,E	1	0	1	0
708	<35	IVF	7	5	2	E,E,E,A,E,E,A	0	0	0		1		0				1			0				1	0				1	0
709	<35	ICSI	5	4	1	A,E,E,E,E	0				1		0				1			0				1	1	0	1	0
710	<35	IVF	7	5	2	A,E,E,A,E,E,E	1	0	1	0
711	<35	ICSI	8	5	3	E,E,E,E,A,A,E,A	0	0	0		1		1	0	1	0
712	<35	IVF	6	5	1	E,A,E,E,E,E	0	0	0								1			1	0	1	0
713	38-39	IVF	4	2	2	E,A,A,E	1	1	0		1		0
714	<35	ICSI	4	2	2	A,E,A,E	0				1		0
715	35-37	IVF	4	4	0	E,E,E,E	1	0	1	0
716	<35	ICSI	3	2	1	E,A,E	0	0	0		1		0
717	<35	ICSI	6	5	1	A,E,E,E,E,E	0				1		0				1			1	0	1	0
718	35-37	IVF	4	4	0	E,E,E,E	1	0	1	0
719	<35	IVF	11	8	3	E,E,E,A,A,E,E,A,E,E,E	0	0	0		1		0				0	1		1	0	1	0
720	<35	ICSI	7	4	3	E,E,E,A,A,E,A	0	0	0		1		0				1			1	0	1	0
721	<35	ICSI	0	0	0
722	<35	ICSI	4	3	1	E,E,A,E	0	0	0		1		1	0	1	0
723	35-37	ICSI	7	3	4	A,A,A,E,A,E,E	1	0	1	0
724	<35	ICSI	5	2	3	A,E,A,E,A	0				1		0
725	<35	IVF	3	1	2	A,E,A	1	0	1	0
726	<35	IVF	3	3	0	E,E,E	0	0	0		1		0				1			0
727	<35	ICSI	9	9	0	E,E,E,E,E,E,E,E,E	0	0	0		1		1	0	1	0
728	<35	ICSI	8	3	5	A,A,E,A,E,E,A,A	0				1		0				1			0
729	<35	ICSI	3	2	1	A,E,E	1	0	1	0
730	35-37	ICSI	5	3	2	E,E,A,E,A	0	0	0		1		0				1			0
731	<35	ICSI	7	3	4	E,A,E,A,A,E,A	1	0	1	0
732	<35	IVF	4	3	1	E,A,E,E	1	0	1	0
733	<35	ICSI	8	6	2	A,E,E,E,E,E,E,A	1	0	1	0
734	35-37	IVF	1	0	1	A
735	<35	IVF	4	3	1	A,E,E,E	0				1		1	0	1	0
736	<35	IVF	3	1	2	A,A,E	0
737	<35	ICSI	9	8	1	A,E,E,E,E,E,E,E,E	0				1		0				1			1	0	1	0
738	35-37	IVF	3	2	1	E,E,A	1	0	1	0
739	<35	ICSI	5	4	1	E,A,E,E,E	1	0	1	0
740	<35	ICSI	7	3	4	A,A,E,A,E,E,A	0				1		1	0	1	0
741	<35	ICSI	0	0	0
742	35-37	ICSI	5	5	0	E,E,E,E,E	0	0	0		1		0				1			0				1	1	0	1	0
743	<35	ICSI	4	2	2	E,A,A,E	0	0	0		1		0
744	<35	ICSI	3	3	0	E,E,E	1	0	1	0
745	35-37	ICSI	9	6	3	E,A,E,A,E,E,E,E,A	1	0	1	0
746	<35	ICSI	9	6	3	E,E,E,E,A,E,E,A,A	0	0	0		1		0				1			0				1	1	0	1	0
747	<35	ICSI	5	3	2	A,E,A,E,E	0				1		1	1	0		1			0
748	<35	ICSI	5	2	3	A,A,E,A,E	1	0	1	0
749	<35	ICSI	7	5	2	E,A,E,E,E,A,E	0	0	0		1		0				1			1	0	1	0
750	<35	IVF	4	3	1	E,E,E,A	0	0	0		1		1	0	1	0
751	<35	IVF	5	4	1	E,A,E,E,E	1	0	1	0
752	<35	ICSI	11	6	5	E,E,A,A,E,E,E,A,A,A,E	1	0	1	0
753	<35	IVF	7	6	1	E,E,A,E,E,E,E	1	1	0		0	1	0				1			1	0	1	0
754	<35	ICSI	5	5	0	E,E,E,E,E	0	0	0		1		1	0	1	0
755	35-37	ICSI	4	2	2	E,A,E,A	0	0	0		1		0
756	35-37	IVF	0	0	0
757	35-37	IVF	1	1	0	E	0	0	0
758	<35	IVF	4	2	2	E,A,A,E	0	0	0		1		0
759	35-37	ICSI	1	1	0	E	0	0	0
760	<35	ICSI	6	3	3	A,E,A,A,E,E	0				1		0				1			0
761	<35	ICSI	2	2	0	E,E	1	0	1	0
762	<35	IVF	7	5	2	E,E,E,A,E,E,A	0	0	0		1		0				1			1	0	1	0
763	<35	IVF	9	5	4	E,E,A,E,A,A,E,A,E	0	0	0		1		0				1			0				1	0				1	0
764	38-39	ICSI	4	1	3	E,A,A,A	0	0	0
765	<35	IVF	3	2	1	E,E,A	0	0	0		1		0
766	<35	ICSI	5	4	1	A,E,E,E,E	0				1		0				1			1	0	1	0
767	<35	IVF	2	1	1	E,A	0	0	0
768	38-39	ICSI	4	3	1	E,E,E,A	1	0	1	0
769	<35	ICSI	2	2	0	E,E	0	0	0		1		1	1	0
770	35-37	IVF	4	3	1	E,A,E,E	0	0	0		1		1	0	1	0
771	35-37	ICSI	4	4	0	E,E,E,E	1	0	1	0
772	38-39	ICSI	5	4	1	E,E,A,E,E	0	0	0		1		0				1			0				1	0
773	<35	IVF	4	2	2	E,A,A,E	1	0	1	0
774	<35	ICSI	10	8	2	E,E,E,E,E,E,E,A,E,A	1	1	0		1		0				1			0				1	0				1	0				1	1	0	1	0
775	<35	ICSI	1	1	0	E	0	0	0
776	<35	IVF	3	2	1	E,A,E	0	0	0		1		0
777	35-37	ICSI	0	0	0
778	35-37	ICSI	0	0	0
779	35-37	ICSI	2	0	2	A,A
780	<35	ICSI	0	0	0
781	38-39	ICSI	5	1	4	A,A,A,E,A	0
782	35-37	ICSI	0	0	0
783	<35	ICSI	3	2	1	E,E,A	0	0	0		1		1	0	1	0
784	<35	IVF	6	6	0	E,E,E,E,E,E	1	0	1	0
785	<35	IVF	3	3	0	E,E,E	1	0	1	0
786	35-37	ICSI	0	0	0
787	38-39	ICSI	0	0	0
788	35-37	ICSI	2	1	1	A,E	0
789	<35	ICSI	7	5	2	E,A,E,E,A,E,E	0	0	0		1		1	0	1	0
790	35-37	ICSI	0	0	0
791	<35	IVF	9	6	3	E,E,E,A,A,E,E,E,A	0	0	0		1		1	0	1	0
792	<35	ICSI	7	4	3	A,E,A,E,A,E,E	0				1		1	0	1	1
793	<35	ICSI	7	5	2	E,A,E,E,E,E,A	0	0	0		1		1	0	1	0
794	<35	ICSI	3	2	1	E,E,A	0	0	0		1		1	0	1	0
795	<35	ICSI	5	2	3	E,A,E,A,A	0	0	0		1		1	0	1	0
796	<35	IVF	1	1	0	E	0	0	0
797	35-37	ICSI	0	0	0
798	<35	ICSI	4	3	1	E,E,A,E	1	1	0		1		1	0	1	0
799	<35	ICSI	10	4	6	A,E,E,A,E,E,A,A,A,A	1	0	1	0
800	35-37	ICSI	4	4	0	E,E,E,E	1	0	1	0
801	<35	IVF	6	3	3	A,E,A,E,E,A	1	0	1	0
802	<35	IVF	0	0	0
803	<35	ICSI	0	0	0
804	38-39	ICSI	5	3	2	E,A,E,E,A	0	0	0		1		0				1			0
805	<35	ICSI	10	7	3	E,A,A,E,E,E,A,E,E,E	1	0	1	0
806	<35	IVF	14	8	6	E,A,E,A,E,A,A,E,A,E,A,E,E,A	1	0	1	0
807	<35	ICSI	0	0	0
808	<35	ICSI	0	0	0
809	<35	IVF	5	2	3	E,A,A,A,E	0	0	0		1		1	0	1	0
810	<35	ICSI	3	3	0	E,E,E	1	0	1	1
811	<35	ICSI	9	8	1	E,E,E,E,E,E,E,E,A	0	0	0		1		1	0	1	0
812	<35	ICSI	4	2	2	E,A,A,E	0	0	0		1		1	0	1	0
813	35-37	ICSI	0	0	0
814	<35	IVF	9	7	2	A,E,E,A,E,E,E,E,E	0				1		0				1			1	0	1	0
815	<35	ICSI	11	7	4	E,A,E,E,A,A,A,E,E,E,E	0	0	0		1		0				1			1	0	1	0
816	<35	IVF	0	0	0
817	35-37	ICSI	8	4	4	E,A,A,E,A,A,E,E	0	0	0		1		1	0	1	0
818	<35	IVF	4	3	1	E,E,E,A	0	0	0		1		0				1			1	0	1	0
819	<35	IVF	5	5	0	E,E,E,E,E	1	0	1	0
820	35-37	ICSI	4	2	2	A,E,A,E	1	0	1	0
821	35-37	ICSI	6	3	3	A,E,A,E,E,A	1	0	1	0
822	<35	ICSI	5	3	2	E,E,A,E,A	0	0	0		1		0				1			0
823	<35	ICSI	10	8	2	A,E,E,E,E,E,E,E,E,A	1	0	1	0
824	<35	ICSI	4	1	3	A,A,E,A	1	0	1	0
825	<35	ICSI	7	6	1	E,E,E,E,A,E,E	1	0	1	0
826	35-37	ICSI	2	1	1	A,E	0
827	<35	IVF	6	4	2	A,E,E,A,E,E	1	0	1	0
828	<35	Aban	0	0	0
829	<35	ICSI	3	1	2	E,A,A	0	0	0
830	35-37	IVF	6	2	4	E,A,A,E,A,A	1	0	1	0
831	35-37	ICSI	4	2	2	A,E,E,A	0				1		1	0	1	0
832	<35	ICSI	7	6	1	E,E,E,E,A,E,E	0	0	0		1		1	0	1	0
833	35-37	ICSI	5	1	4	A,E,A,A,A	0
834	38-39	ICSI	7	4	3	A,E,E,A,E,A,E	0				1		0				1			1	0	1	0
835	<35	ICSI	5	4	1	E,A,E,E,E	0	0	0		1		1	0	1	0
836	<35	ICSI	0	0	0
837	35-37	IVF	8	7	1	E,E,A,E,E,E,E,E	1	0	1	0
838	<35	ICSI	5	5	0	E,E,E,E,E	1	0	1	0
839	<35	IVF	5	5	0	E,E,E,E,E	1	0	1	0
840	38-39	IVF	14	2	12	A,A,E,A,A,A,A,A,A,A,A,E,A,A	1	0	1	0
841	<35	ICSI	7	5	2	E,A,E,E,E,E,A	0	0	0		1		1	0	1	0
842	<35	ICSI	2	1	1	A,E	0
843	<35	IVF	4	4	0	E,E,E,E	0	0	0		1		0				1			1	0	1	0
844	35-37	ICSI	5	4	1	E,E,E,E,A	1	0	1	0
845	38-39	IVF	0	0	0
846	<35	IVF	5	3	2	A,E,E,A,E	0				1		0				1			0
847	<35	IVF	10	6	4	E,A,E,E,E,A,E,A,E,A	0	0	0		1		1	0	1	0
848	35-37	ICSI	7	6	1	E,E,E,A,E,E,E	0	0	0		1		1	0	1	0
849	<35	IVF	4	3	1	A,E,E,E	1	0	1	0
850	35-37	IVF	0	0	0
851	35-37	IVF	2	1	1	A,E	0
852	<35	IVF	7	4	3	E,A,E,A,A,E,E	1	0	1	0
853	<35	ICSI	9	5	4	A,E,E,A,E,A,E,A,E	1	0	1	0
854	<35	ICSI	5	4	1	E,A,E,E,E	0	0	0		1		0				1			1	0	1	0
855	35-37	ICSI	14	6	8	E,E,A,E,A,E,A,A,A,A,E,A,A,E	1	0	1	0
856	35-37	ICSI	8	7	1	E,E,E,E,A,E,E,E	1	0	1	0
857	<35	ICSI	3	3	0	E,E,E	1	0	1	0
858	<35	ICSI	4	2	2	A,A,E,E	1	0	1	0
859	<35	ICSI	4	4	0	E,E,E,E	0	0	0		1		0				1			1	0	1	0
860	<35	ICSI	5	4	1	E,A,E,E,E	0	0	0		1		0				0	1		1	0	1	0
861	<35	IVF	5	2	3	A,E,A,A,E	0				1		1	0	1	0
862	<35	IVF	6	4	2	A,E,E,A,E,E	1	0	1	0
863	<35	ICSI	8	6	2	E,A,A,E,E,E,E,E	0	0	0		1		0				1			0				1	1	0	1	0
864	<35	ICSI	7	5	2	A,E,E,E,E,A,E	0				1		1	0	1	0
865	<35	ICSI	1	0	1	A
866	38-39	IVF	0	0	0
867	35-37	IVF	3	2	1	A,E,E	0				1		0
868	35-37	IVF	6	4	2	E,A,E,A,E,E	0	0	0		1		1	0	1	0
869	35-37	ICSI	3	3	0	E,E,E	0	0	0		1		0				1			0
870	35-37	Aban	0	0	0
871	35-37	ICSI	7	6	1	E,E,E,E,A,E,E	0	0	0		1		0				1			1	0	1	0
872	<35	ICSI	4	3	1	E,A,E,E	1	0	1	0
873	<35	ICSI	8	7	1	E,E,E,A,E,E,E,E	1	0	1	0
874	38-39	ICSI	3	2	1	E,A,E	1	0	1	0
875	35-37	ICSI	6	4	2	E,E,A,A,E,E	0	0	0		1		1	0	1	0
876	<35	IVF	5	4	1	E,A,E,E,E	1	0	1	0
877	<35	IVF	6	5	1	E,E,E,E,A,E	1	0	1	0
878	<35	IVF	3	1	2	E,A,A	1	0	1	0
879	<35	ICSI	8	5	3	E,A,E,E,E,E,A,A	0	0	0		1		1	0	1	0
880	<35	ICSI	5	2	3	A,A,E,A,E	1	0	1	0
881	35-37	ICSI	1	0	1	A
882	35-37	IVF	3	1	2	A,A,E	0
883	<35	ICSI	14	7	7	E,A,A,E,A,E,A,E,A,E,E,A,E,A	0	0	0		1		0				1			0				1	1	0	1	0
884	<35	IVF	4	3	1	E,E,A,E	0	0	0		1		1	0	1	0
885	<35	ICSI	2	2	0	E,E	0	0	0		1		0
886	<35	IVF	8	5	3	E,E,A,E,E,A,E,A	0	0	0		1		0				1			0				1	1	0	1	0
887	<35	Aban	0	0	0
888	<35	ICSI	4	2	2	A,A,E,E	1	0	1	0
889	38-39	IVF	2	1	1	E,A	0	0	0
890	38-39	IVF	5	3	2	A,E,E,E,A	0				1		0				1			1	0	1	0
891	35-37	ICSI	0	0	0
892	<35	ICSI	11	10	1	E,E,E,E,E,E,E,A,E,E,E	0	0	0		1		0				1			0				1	0				1	1	0	1	0
893	<35	ICSI	5	3	2	E,A,A,E,E	1	0	1	0
894	<35	ICSI	6	5	1	E,E,A,E,E,E	0	0	0		1		0				1			1	0	1	0
895	35-37	ICSI	7	5	2	A,E,A,E,E,E,E	0				1		1	1	0		1			0				1	1	0	1	0
896	<35	ICSI	7	5	2	E,E,E,E,A,E,A	0	0	0		0	1	1	0	1	0
897	35-37	ICSI	4	2	2	A,E,E,A	0				1		0
898	35-37	ICSI	8	6	2	E,E,E,E,E,E,A,A	1	0	1	0
899	<35	IVF	1	1	0	E	0	0	0
900	<35	ICSI	2	2	0	E,E	1	1	0		1		0
901	<35	ICSI	11	8	3	A,E,E,E,E,E,E,A,E,A,E	1	0	1	0
902	35-37	ICSI	2	0	2	A,A
903	35-37	IVF	0	0	0
904	<35	ICSI	0	0	0
905	38-39	IVF	4	3	1	E,E,E,A	0	0	0		1		1	0	1	0
906	<35	ICSI	2	1	1	A,E	0
907	<35	ICSI	5	4	1	E,E,E,A,E	1	0	1	0
908	<35	IVF	2	2	0	E,E	1	0	1	0
909	38-39	ICSI	2	1	1	E,A	1	0	1	0
910	<35	IVF	8	6	2	A,E,E,A,E,E,E,E	1	0	1	0
911	35-37	ICSI	6	2	4	E,A,A,E,A,A	0	0	0		1		1	0	1	0
912	<35	IVF	6	3	3	E,E,E,A,A,A	1	0	1	0
913	<35	ICSI	14	9	5	A,E,A,A,E,E,A,E,E,E,E,A,E,E	0				1		0				1			1	0	1	0
914	<35	ICSI	1	1	0	E	0	0	0
915	<35	IVF	4	3	1	E,E,A,E	0	0	0		1		1	0	1	0
916	35-37	IVF	2	2	0	E,E	1	0	1	0
917	35-37	ICSI	4	3	1	E,A,E,E	1	0	1	0
918	<35	ICSI	8	6	2	E,A,E,E,E,A,E,E	0	0	0		1		0				1			1	0	1	0
919	35-37	ICSI	4	3	1	E,E,E,A	1	0	1	0
920	<35	ICSI	10	6	4	E,E,A,E,E,A,A,E,E,A	0	0	0		1		0				1			1	0	1	0
921	35-37	ICSI	0	0	0
922	38-39	IVF	0	0	0
923	<35	ICSI	4	3	1	E,E,A,E	0	0	0		1		1	0	1	0
924	<35	ICSI	2	2	0	E,E	0	0	0		0
925	38-39	ICSI	0	0	0
926	<35	ICSI	6	2	4	A,E,E,A,A,A	1	1	0		1		1	0	1	0
927	<35	ICSI	3	2	1	E,E,A	1	0	1	0
928	38-39	ICSI	4	3	1	A,E,E,E	0				1		1	1	0	0	1			0
929	<35	ICSI	7	6	1	E,E,A,E,E,E,E	0	0	0		1		0				1			0				1	1	0	1	0
930	35-37	ICSI	3	3	0	E,E,E	0	0	0		1		0				1			0
931	<35	ICSI	8	7	1	E,E,E,E,E,E,A,E	1	0	1	0
932	35-37	IVF	10	6	4	A,E,E,E,E,E,E,A,A,A	1	1	0		1		0				1			1	0	1	0
933	<35	IVF	7	4	3	A,E,A,A,E,E,E	1	0	1	0
934	<35	ICSI	5	5	0	E,E,E,E,E	1	0	1	0
935	<35	ICSI	4	3	1	A,E,E,E	0				1		1	0	1	0
936	<35	IVF	14	9	5	E,A,E,A,E,A,E,E,A,E,A,A,A,E	1	0	1	0
937	<35	IVF	7	6	1	E,E,E,E,E,E,A	1	0	1	0
938	38-39	ICSI	2	0	2	A,A
939	35-37	ICSI	2	2	0	E,E	1	0	1	0
940	<35	IVF	7	4	3	A,E,A,E,A,A,E	0				1		1	0	1	0
941	<35	ICSI	4	2	2	A,A,E,E	0				1		0
942	<35	IVF	8	6	2	A,A,E,E,E,E,E,E	1	0	1	0
943	35-37	ICSI	0	0	0
944	<35	IVF	7	6	1	E,E,A,E,E,E,E	0	0	0		0	1	0				1			0				1	0				1	1	0	1	0
945	<35	IVF	2	2	0	E,E	1	0	1	0
946	35-37	ICSI	0	0	0
947	38-39	IVF	0	0	0
948	<35	ICSI	8	3	5	A,A,E,E,A,A,E,A	1	0	1	0
949	<35	ICSI	2	1	1	A,E	0
950	35-37	ICSI	0	0	0
951	<35	IVF	0	0	0
952	<35	IVF	2	2	0	E,E	0	0	0		1		0
953	35-37	ICSI	6	5	1	E,E,E,E,E,A	0	0	0		1		0				1			1	0	1	0
954	35-37	IVF	4	2	2	E,A,A,E	0	0	0		1		0
955	35-37	ICSI	5	3	2	A,E,A,E,E	1	0	1	0
956	<35	ICSI	5	4	1	E,A,E,E,E	0	0	0		1		0				0	1		1	0	1	0
957	38-39	ICSI	2	2	0	E,E	0	0	0		1		1	0	1	0
958	35-37	ICSI	4	1	3	E,A,A,A	0	0	0
959	<35	IVF	4	2	2	E,A,E,A	1	0	1	0
960	<35	ICSI	9	7	2	A,E,E,E,E,A,E,E,E	0				1		1	0	1	0
961	<35	ICSI	3	2	1	A,E,E	0				1		0
962	35-37	ICSI	6	5	1	E,E,E,A,E,E	0	0	0		1		0				1			1	0	1	0
963	<35	IVF	4	3	1	E,A,E,E	0	0	0		1		0				1			0
964	38-39	ICSI	0	0	0
965	<35	ICSI	11	9	2	E,E,A,A,E,E,E,E,E,E,E	0	0	0		1		0				1			1	0	1	0
966	38-39	ICSI	2	1	1	E,A	0	0	0
967	35-37	ICSI	4	2	2	E,A,E,A	1	0	1	0
968	<35	ICSI	4	3	1	E,A,E,E	0	0	0		1		1	0	1	0
969	<35	ICSI	1	0	1	A
970	38-39	ICSI	5	4	1	E,A,E,E,E	0	0	0		1		1	0	1	0
971	35-37	ICSI	0	0	0
972	<35	IVF	0	0	0
973	<35	IVF	0	0	0
974	38-39	ICSI	4	2	2	A,E,A,E	1	0	1	0
975	<35	ICSI	4	3	1	E,A,E,E	0	0	0		1		1	0	1	0
976	<35	IVF	2	1	1	E,A	0	0	0
977	35-37	ICSI	4	2	2	E,A,E,A	1	0	1	0
978	38-39	ICSI	3	1	2	E,A,A	1	0	1	0
979	35-37	ICSI	6	2	4	A,E,A,A,E,A	0				1		0
980	<35	ICSI	2	2	0	E,E	0	0	0		1		0
981	<35	ICSI	4	2	2	A,A,E,E	0				1		0
982	<35	ICSI	3	3	0	E,E,E	0	0	0		1		1	0	1	0
983	<35	IVF	4	3	1	A,E,E,E	0				1		1	0	1	0
984	35-37	ICSI	3	2	1	E,A,E	0	0	0		1		1	0	1	0
985	<35	ICSI	5	3	2	E,A,E,E,A	1	0	1	0
986	<35	ICSI	0	0	0
987	35-37	ICSI	4	3	1	E,A,E,E	1	0	1	0
988	<35	ICSI	2	2	0	E,E	0	0	0		1		0
989	<35	ICSI	6	3	3	E,E,A,A,A,E	0	0	0		1		0				1			0
990	35-37	IVF	3	2	1	E,A,E	0	0	0		1		1	0	1	0
991	<35	IVF	2	2	0	E,E	0	0	0		1		0
992	<35	IVF	5	4	1	E,E,E,A,E	1	0	1	0
993	35-37	IVF	3	3	0	E,E,E	0	0	0		1		0				0
994	35-37	ICSI	0	0	0
995	<35	ICSI	5	3	2	A,A,E,E,E	0				1		0				1			0
996	35-37	IVF	8	3	5	A,A,E,E,E,A,A,A	0				1		0				1			0
997	35-37	ICSI	2	1	1	A,E	0
998	<35	ICSI	9	7	2	A,E,E,E,E,E,E,A,E	0				0	1	1	0	1	0
999	38-39	ICSI	1	1	0	E	1	0	1	0
1000	<35	ICSI	6	5	1	E,E,E,E,A,E	1	0	1	0
[truncated: 30 more columns]

## Sheet: 3 PGS2
							Attempt 1				502		Attempt 2				261			Attempt 3				140		Attempt 4				59		Attempt 5				29		Attempt 6				14	Attempt 7				6	Attempt 8
							870	27	336		500			10	176		255				2	85		138			5	35		58			1	7		28			0	6		14		0	2		6		1
ID	Age	Insemination	Embryos (n)	Euploid (n)	Aneuploid (n)	Transfer order	Pregnant	Miscarriage	Live birth	Multiple	Thaw1	Thaw1a	Pregnant	Miscarriage	Live birth	Multiple	Thaw2	Thaw2b	Thaw2c	Pregnant	Miscarriage	Live birth	Multiple	Thaw3	Thaw3b	Pregnant	Miscarriage	Live birth	Multiple	Thaw4	Thaw4b	Pregnant	Miscarriage	Live birth	Multiple	Thaw5	Thaw5b	Pregnant	Miscarriage	Live birth	Multiple	Thaw6	Pregnant	Miscarriage	Live birth	Multiple	Thaw7	Pregnant	Miscarriage
1	<35	ICSI	0	0	0
2	<35	ICSI	7	5	2	E,E,A,A,E,E,E	1	0	1	0
3	<35	ICSI	6	3	3	A,E,E,A,E,A	0				1		0				1			0				1		0				1		0				1		0
4	<35	IVF	4	3	1	E,E,E,A	1	0	1	0
5	<35	ICSI	2	1	1	A,E	0				1		0
6	35-37	IVF	2	1	1	E,A	0	0	0		1		0
7	<35	ICSI	0	0	0
8	<35	ICSI	4	2	2	E,A,E,A	0	0	0		1		1	0	1	0
9	<35	IVF	12	6	6	E,E,A,E,A,A,E,A,E,A,E,A	1	0	1	0
10	35-37	ICSI	0	0	0
11	38-39	ICSI	4	3	1	E,E,E,A	0	0	0		1		0				1			0				1		1	0	1	0
12	38-39	ICSI	0	0	0
13	<35	IVF	2	2	0	E,E	0	0	0		1		1	0	1	0
14	<35	IVF	1	0	1	A	0
15	<35	ICSI	5	4	1	E,E,A,E,E	1	0	1	0
16	<35	ICSI	7	3	4	E,A,E,E,A,A,A	1	0	1	0
17	<35	IVF	4	3	1	E,E,E,A	0	0	0		1		0				1			1	0	1	0
18	38-39	ICSI	5	1	4	E,A,A,A,A	0	0	0		1		0				1			0				1		0				1		0
19	35-37	ICSI	1	0	1	A	1	0	1	0
20	<35	ICSI	2	2	0	E,E	1	0	1	0
21	<35	ICSI	4	4	0	E,E,E,E	1	0	1	0
22	<35	ICSI	5	2	3	E,A,A,E,A	0	0	0		1		0				1			0				0	1	0
23	<35	IVF	4	3	1	E,E,E,A	0	0	0		1		0				1			0				1		0
24	38-39	Aban	0	0	0
25	<35	IVF	8	5	3	A,E,E,E,A,E,E,A	1	0	1	0
26	<35	IVF	0	0	0
27	<35	ICSI	0	0	0
28	<35	ICSI	5	3	2	A,A,E,E,E	0				1		0				1			0				1		0				1		0
29	35-37	Aban	0	0	0
30	35-37	IVF	4	2	2	A,E,E,A	1	0	1	0
31	<35	ICSI	7	7	0	E,E,E,E,E,E,E	1	0	1	0
32	<35	IVF	1	1	0	E	0	0	0
33	<35	IVF	12	8	4	E,E,E,A,A,A,E,E,E,E,E,A	0	0	0		1		0				1			1	0	1	0
34	<35	ICSI	12	3	9	A,A,A,E,A,A,A,E,A,E,A,A	1	1	0		1		0				1			1	0	1	0
35	<35	ICSI	2	1	1	E,A	1	0	1	0
36	38-39	Aban	0	0	0
37	<35	ICSI	3	2	1	A,E,E	1	0	1	0
38	<35	ICSI	7	4	3	E,A,A,E,E,E,A	1	0	1	0
39	<35	ICSI	6	4	2	E,A,E,E,A,E	1	0	1	0
40	<35	ICSI	5	5	0	E,E,E,E,E	1	0	1	0
41	38-39	ICSI	2	1	1	E,A	1	0	1	0
42	<35	IVF	5	5	0	E,E,E,E,E	0	0	0		1		0				1			0				1		0				1		1	0	1	0
43	38-39	ICSI	2	1	1	A,E	1	0	1	0
44	<35	IVF	2	2	0	E,E	0	0	0		1		0
45	35-37	IVF	5	3	2	A,A,E,E,E	1	0	1	0
46	35-37	ICSI	3	3	0	E,E,E	0	0	0		1		0				1			0
47	<35	ICSI	3	2	1	E,E,A	0	0	0		1		1	0	1	0
48	<35	IVF	0	0	0
49	<35	ICSI	6	4	2	E,E,A,A,E,E	0	0	0		1		0				1			0				0	1	1	0	1	0
50	<35	IVF	6	6	0	E,E,E,E,E,E	1	0	1	0
51	<35	ICSI	9	9	0	E,E,E,E,E,E,E,E,E	0	0	0		1		0				1			1	0	1	0
52	<35	ICSI	11	8	3	E,E,A,E,E,A,E,A,E,E,E	1	0	1	0
53	<35	ICSI	8	3	5	E,A,A,A,E,A,A,E	0	0	0		1		1	0	1	0
54	<35	ICSI	6	4	2	A,E,E,E,E,A	1	0	1	0
55	<35	ICSI	5	4	1	E,E,E,A,E	1	0	1	0
56	<35	ICSI	4	4	0	E,E,E,E	1	0	1	0
57	<35	ICSI	9	5	4	E,A,A,E,E,E,A,E,A	1	0	1	0
58	35-37	ICSI	0	0	0
59	<35	IVF	5	4	1	E,E,E,A,E	0	0	0		1		0				1			0				1		0				1		0
60	<35	IVF	7	5	2	E,A,E,A,E,E,E	0	0	0		1		0				1			0				1		0				1		0				1						1	0
61	<35	ICSI	4	4	0	E,E,E,E	1	0	1	0
62	<35	ICSI	7	5	2	A,E,E,A,E,E,E	0				1		1	0	1	0
63	38-39	ICSI	2	2	0	E,E	0	0	0		1		0
64	38-39	IVF	1	0	1	A	0
65	35-37	IVF	7	4	3	E,A,A,E,A,A,E	1	0	1	0
66	<35	ICSI	3	3	0	E,E,E	1	0	1	0
67	<35	ICSI	4	4	0	E,E,E,E	1	0	1	0
68	<35	ICSI	8	6	2	E,E,A,E,E,E,E,A	1	0	1	0
69	<35	ICSI	6	3	3	E,E,A,E,A,A	0	0	0		1		1	0	1	0
70	<35	ICSI	6	5	1	E,E,E,A,E,E	0	0	0		1		1	0	1	0
71	38-39	IVF	3	3	0	E,E,E	0	0	0		1		0				1			0
72	<35	ICSI	5	3	2	A,A,E,E,E	0				1		1	0	1	0
73	<35	IVF	9	8	1	E,A,E,E,E,E,E,E,E	0	0	0		1		0				1			0				1		0				1		0				1		1	0	1	0
74	38-39	ICSI	1	1	0	E	0	0	0
75	<35	ICSI	9	5	4	E,A,A,E,E,A,E,E,A	1	0	1	0
76	<35	IVF	3	2	1	E,E,A	0	0	0		1		0				0
77	38-39	IVF	4	3	1	E,A,E,E	0	0	0		1		1	0	1	0
78	35-37	IVF	6	5	1	E,E,E,E,E,A	1	0	1	0
79	35-37	ICSI	3	1	2	E,A,A	1	0	1	0
80	35-37	ICSI	5	5	0	E,E,E,E,E	0	0	0		1		1	0	1	0
81	<35	IVF	0	0	0
82	<35	ICSI	7	5	2	E,A,E,A,E,E,E	1	0	1	0
83	<35	IVF	6	6	0	E,E,E,E,E,E	1	0	1	0
84	38-39	ICSI	4	1	3	E,A,A,A	1	0	1	0
85	<35	ICSI	5	4	1	E,E,A,E,E	1	0	1	0
86	<35	ICSI	7	2	5	A,A,E,A,A,A,E	0				1		0				1			0				1		0				1		0				1		0				1	0
87	<35	IVF	7	5	2	E,A,E,E,E,E,A	0	0	0		1		1	0	1	0
88	35-37	ICSI	1	1	0	E	0	0	0
89	35-37	ICSI	10	7	3	A,E,E,E,E,E,E,E,A,A	0				1		0				1			1	0	1	0
90	35-37	ICSI	4	3	1	A,E,E,E	1	1	0		1		1	0	1	0
91	<35	ICSI	8	6	2	E,E,E,E,E,A,E,A	1	0	1	0
92	<35	IVF	4	3	1	A,E,E,E	0				1		0				1			0				1		1	1	0
93	35-37	IVF	4	4	0	E,E,E,E	1	0	1	0
94	<35	IVF	9	4	5	A,A,A,E,A,E,E,E,A	0				1		1	0	1	0
95	35-37	ICSI	3	2	1	A,E,E	0				1		0				1			0
96	35-37	IVF	0	0	0
97	35-37	IVF	4	3	1	E,E,E,A	1	0	1	0
98	<35	IVF	8	6	2	E,E,E,E,E,E,A,A	1	0	1	0
99	38-39	ICSI	5	2	3	E,A,A,E,A	0	0	0		1		0				1			0				1		1	1	0		0
100	35-37	ICSI	4	2	2	A,E,E,A	0				1		0				1			0				1		0
101	35-37	ICSI	4	2	2	E,E,A,A	0	0	0		1		1	0	1	0
102	<35	ICSI	5	4	1	E,A,E,E,E	0	0	0		1		0				1			1	0	1	0
103	35-37	IVF	2	1	1	A,E	1	0	1	0
104	<35	ICSI	5	4	1	E,E,E,E,A	0	0	0		1		0				1			1	0	1	0
105	35-37	IVF	2	1	1	A,E	1	0	1	0
106	35-37	IVF	2	1	1	A,E	1	0	1	0
107	<35	ICSI	6	2	4	A,E,A,A,E,A	1	0	1	0
108	<35	ICSI	4	3	1	E,E,A,E	1	0	1	0
109	35-37	ICSI	2	0	2	A,A	0	0	0		1		0
110	35-37	ICSI	5	4	1	E,A,E,E,E	0	0	0		1		0				1			0				1		1	0	1	0
111	<35	IVF	6	5	1	E,E,E,E,A,E	1	0	1	0
112	38-39	IVF	4	1	3	E,A,A,A	1	0	1	0
113	<35	ICSI	1	1	0	E	1	0	1	0
114	<35	ICSI	5	4	1	E,E,A,E,E	0	0	0		1		0				1			1	1	0		1		1	0	1	0
115	<35	Aban	0	0	0
116	35-37	ICSI	3	2	1	A,E,E	0				1		0				1			0
117	<35	ICSI	4	3	1	E,E,E,A	1	0	1	0
118	<35	ICSI	3	2	1	E,A,E	0	0	0		1		1	0	1	0
119	35-37	ICSI	2	1	1	A,E	1	0	1	0
120	<35	ICSI	8	5	3	E,A,E,A,A,E,E,E	0	0	0		1		0				1			0				1		1	0	1	0
121	35-37	ICSI	4	3	1	E,E,A,E	1	0	1	0
122	<35	IVF	9	7	2	E,A,E,E,E,E,A,E,E	1	0	1	1
123	<35	ICSI	5	2	3	E,A,E,A,A	1	0	1	0
124	<35	IVF	5	3	2	E,E,E,A,A	1	1	0		1		0				1			1	0	1	0
125	<35	ICSI	5	4	1	E,A,E,E,E	0	0	0		1		0				1			1	0	1	0
126	<35	ICSI	9	7	2	E,E,E,E,E,A,E,E,A	1	0	1	0
127	35-37	ICSI	2	2	0	E,E	0	0	0		1		0
128	<35	IVF	5	4	1	E,E,E,A,E	1	0	1	0
129	35-37	ICSI	2	2	0	E,E	1	0	1	0
130	<35	ICSI	3	2	1	A,E,E	0				1		0				1			1	0	1	0
131	<35	ICSI	4	3	1	E,E,E,A	1	0	1	0
132	38-39	IVF	2	0	2	A,A	0				1		0
133	38-39	ICSI	0	0	0
134	<35	IVF	7	5	2	E,E,E,A,E,A,E	0	0	0		1		1	0	1	0
135	35-37	ICSI	3	2	1	E,E,A	1	0	1	0
136	35-37	IVF	3	2	1	E,A,E	1	0	1	0
137	<35	ICSI	4	2	2	A,E,E,A	1	0	1	0
138	<35	ICSI	8	6	2	E,A,A,E,E,E,E,E	0	0	0		0	1	1	0	1	0
139	<35	IVF	0	0	0
140	<35	ICSI	5	4	1	E,E,E,A,E	1	0	1	0
141	35-37	IVF	14	10	4	A,A,E,E,A,E,A,E,E,E,E,E,E,E	1	0	1	0
142	<35	ICSI	6	4	2	E,A,E,A,E,E	0	0	0		1		0				1			1	0	1	0
143	35-37	IVF	8	4	4	A,A,E,A,E,A,E,E	0				1		0				1			1	0	1	0
144	35-37	ICSI	0	0	0
145	<35	ICSI	0	0	0
146	35-37	IVF	10	7	3	E,E,A,A,E,E,E,E,E,A	0	0	0		1		1	0	1	0
147	35-37	ICSI	2	2	0	E,E	0	0	0		1		0
148	<35	IVF	3	2	1	E,E,A	0	0	0		1		1	0	1	0
149	<35	ICSI	4	3	1	E,E,A,E	0	0	0		1		0				1			0				1		0
150	38-39	ICSI	4	3	1	A,E,E,E	0				1		0				1			0				1		0
151	<35	IVF	3	2	1	A,E,E	0				0	1	0
152	38-39	IVF	5	3	2	E,E,A,E,A	0	0	0		1		1	0	1	0
153	<35	ICSI	0	0	0
154	<35	ICSI	3	2	1	E,E,A	1	0	1	0
155	35-37	ICSI	2	1	1	A,E	1	0	1	0
156	35-37	IVF	4	2	2	A,E,E,A	1	0	1	0
157	<35	IVF	5	5	0	E,E,E,E,E	1	0	1	0
158	38-39	ICSI	4	3	1	E,E,A,E	0	0	0		1		0				0							1		0
159	<35	IVF	4	3	1	A,E,E,E	1	0	1	0
160	35-37	ICSI	3	2	1	E,A,E	0	0	0		1		0				1			0
161	<35	ICSI	7	5	2	E,E,A,E,E,A,E	1	0	1	0
162	38-39	ICSI	7	3	4	E,A,A,E,A,A,E	0	0	0		1		1	1	0		1			0				1		0				1		0				0	1	0
163	<35	IVF	6	5	1	E,E,E,E,E,A	0	0	0		1		0				1			0				1		0				1		0				1		0
164	<35	ICSI	2	2	0	E,E	0	0	0		1		0
165	<35	ICSI	6	3	3	E,A,E,E,A,A	0	0	0		1		0				1			0				1		0				1		0				1		0
166	<35	ICSI	0	0	0
167	<35	IVF	4	3	1	E,E,A,E	1	0	1	0
168	35-37	IVF	4	3	1	E,E,A,E	0	0	0		1		0				1			0				1		0
169	<35	ICSI	4	2	2	A,A,E,E	0				1		0				1			0				1		0
170	38-39	ICSI	5	0	5	A,A,A,A,A	0	0	0		1		0				1			0				1		1	1	0		1		0
171	<35	ICSI	9	4	5	A,A,E,A,A,E,E,A,E	0				1		0				1			1	0	1	0
172	<35	ICSI	5	3	2	A,E,E,A,E	0				1		1	0	1	0
173	38-39	ICSI	0	0	0
174	<35	ICSI	3	1	2	A,E,A	0				1		0				1			0
175	<35	ICSI	0	0	0
176	35-37	IVF	3	2	1	E,E,A	0	0	0		1		1	0	1	0
177	<35	IVF	4	4	0	E,E,E,E	0	0	0		1		1	0	1	0
178	35-37	IVF	4	2	2	E,E,A,A	0	0	0		1		0				1			1	0	1	0
179	35-37	IVF	2	2	0	E,E	1	0	1	0
180	38-39	ICSI	7	4	3	E,E,A,A,A,E,E	0	0	0		1		0				1			1	0	1	0
181	<35	IVF	2	2	0	E,E	1	0	1	0
182	<35	ICSI	5	4	1	A,E,E,E,E	0				1		1	0	1	0
183	<35	IVF	5	3	2	A,A,E,E,E	1	0	1	0
184	35-37	ICSI	0	0	0
185	35-37	ICSI	3	2	1	E,E,A	1	0	1	0
186	<35	IVF	7	6	1	E,E,E,E,E,A,E	0	0	0		1		1	0	1	0
187	<35	ICSI	2	2	0	E,E	0	0	0		1		0
188	<35	IVF	4	2	2	E,A,E,A	0	0	0		1		0				1			1	0	1	0
189	<35	IVF	1	0	1	A	0
190	38-39	ICSI	0	0	0
191	35-37	ICSI	5	3	2	A,E,E,E,A	0				1		1	0	1	0
192	35-37	ICSI	5	4	1	E,E,A,E,A	0	0	0		1		1	0	1	0
193	38-39	IVF	2	1	1	A,E	0				1		0
194	<35	ICSI	9	7	2	A,E,E,E,E,E,A,E,E	0				1		0				1			1	0	1	0
195	<35	IVF	8	4	4	E,A,E,A,A,A,E,A	1	0	1	0
196	<35	IVF	0	0	0
197	<35	IVF	10	9	1	A,E,E,E,E,E,E,E,E,E	1	0	1	0
198	<35	IVF	8	7	1	E,E,E,A,E,E,E,E	0	0	0		1		1	0	1	0
199	<35	ICSI	11	5	6	A,E,A,A,E,E,A,E,A,E,A	0				1		0				1			0				1		1	0	1	0
200	35-37	ICSI	3	3	0	E,E,E	0	0	0		1		1	0	1	0
201	<35	ICSI	2	1	1	A,E	0				1		0
202	<35	ICSI	10	7	3	A,E,E,E,A,A,E,E,E,E	1	0	1	0
203	<35	ICSI	7	6	1	E,E,E,A,E,E,E	0	0	0		1		1	0	1	0
204	<35	ICSI	14	7	7	A,E,A,E,A,A,A,A,E,E,E,E,E,A	0				1		1	0	1	0
205	<35	ICSI	0	0	0
206	<35	ICSI	11	5	6	A,A,E,E,E,A,A,E,A,A,E	1	0	1	0
207	<35	ICSI	5	1	4	A,A,A,E,A	1	0	1	0
208	<35	IVF	7	6	1	E,E,E,E,E,A,E	1	0	1	0
209	35-37	IVF	4	2	2	E,A,A,E	1	0	1	0
210	35-37	ICSI	3	1	2	E,A,A	0	0	0		1		0				1			0
211	<35	IVF	5	4	1	A,E,E,E,E	0				1		0				1			0				1		0				1		0
212	35-37	IVF	8	5	3	A,E,E,E,E,E,A,A	0				1		1	0	1	0
213	<35	ICSI	0	0	0
214	<35	IVF	5	4	1	E,E,E,E,A	0	0	0		1		0				1			0				1		1	0	1	0
215	<35	IVF	9	5	4	A,E,E,A,A,E,E,A,E	1	0	1	1
216	<35	ICSI	12	9	3	E,E,A,E,E,A,E,E,E,E,A,E	1	0	1	0
217	35-37	ICSI	7	5	2	E,E,A,E,E,E,A	0	0	0		1		1	0	1	0
218	<35	ICSI	10	9	1	E,E,E,E,A,E,E,E,E,E	0	0	0		1		0				1			0				1		0				1		1	0	1	1
219	<35	IVF	11	5	6	A,A,E,E,E,E,A,E,A,A,A	1	0	1	0
220	35-37	IVF	11	8	3	A,A,E,E,A,E,E,E,E,E,E	1	0	1	0
221	38-39	ICSI	3	1	2	A,E,A	1	0	1	0
222	38-39	ICSI	1	0	1	A	0
223	<35	ICSI	5	4	1	E,E,E,A,E	1	1	0		1		0				1			1	0	1	0
224	<35	ICSI	0	0	0
225	35-37	ICSI	8	2	6	E,A,A,E,A,A,A,A	0	0	0		1		1	0	1	0
226	38-39	ICSI	4	3	1	A,E,E,E	0				1		0				1			1	0	1	0
227	35-37	ICSI	3	2	1	E,E,A	0	0	0		1		1	0	1	0
228	<35	ICSI	5	3	2	A,A,E,E,E	0				1		0				1			0				1		0				1		0
229	<35	ICSI	7	5	2	A,E,E,E,A,E,E	0				1		1	0	1	0
230	38-39	IVF	6	3	3	A,A,E,E,E,A	0				1		0				1			1	0	1	0
231	<35	ICSI	8	6	2	E,E,A,E,A,E,E,E	0	0	0		1		1	0	1	0
232	<35	ICSI	10	7	3	E,A,E,A,A,E,E,E,E,E	0	0	0		1		1	0	1	0
233	<35	IVF	9	7	2	A,E,A,E,E,E,E,E,E	0				1		0				1			0				1		0				1		0				1		1	0	1	0
234	<35	ICSI	2	2	0	E,E	0	0	0		1		0
235	<35	IVF	5	5	0	E,E,E,E,E	1	0	1	0
236	<35	ICSI	5	3	2	E,E,E,A,A	0	0	0		1		1	0	1	0
237	<35	IVF	5	3	2	E,A,E,E,A	1	0	1	0
238	<35	ICSI	5	4	1	E,A,E,E,E	0	0	0		1		0				1			0				1		1	0	1	0
239	35-37	IVF	5	3	2	A,E,A,E,E	1	0	1	0
240	35-37	IVF	2	2	0	E,E	0	0	0		1		0
241	<35	ICSI	7	6	1	E,E,E,E,A,E,E	1	0	1	0
242	38-39	IVF	6	4	2	A,E,E,A,E,E	1	0	1	0
243	<35	IVF	5	5	0	E,E,E,E,E	1	0	1	0
244	<35	ICSI	4	3	1	A,E,E,E	0				0	1	0				1			0
245	<35	IVF	0	0	0
246	<35	IVF	2	2	0	E,E	0	0	0		1		0
247	35-37	ICSI	6	3	3	E,A,A,A,E,E	1	0	1	0
248	<35	IVF	6	4	2	A,E,E,E,E,A	0				1		1	0	1	0
249	<35	ICSI	4	3	1	E,A,E,E	0	0	0		0	1	1	0	1	0
250	35-37	ICSI	2	2	0	E,E	1	0	1	0
251	38-39	IVF	3	1	2	A,A,E	0				1		0				1			0
252	38-39	ICSI	0	0	0
253	35-37	ICSI	2	2	0	E,E	1	1	0		1		1	0	1	0
254	<35	ICSI	2	2	0	E,E	0	0	0		1		1	0	1	0
255	<35	ICSI	5	4	1	E,E,A,E,E	0	0	0		1		0				1			0				1		0				1		0
256	<35	ICSI	4	1	3	A,A,E,A	1	0	1	0
257	<35	ICSI	4	3	1	E,A,E,E	0	0	0		1		0				1			0				1		1	1	0
258	35-37	IVF	4	3	1	A,E,E,E	0				1		1	0	1	0
259	<35	IVF	4	4	0	E,E,E,E	1	0	1	0
260	<35	ICSI	0	0	0
261	38-39	IVF	5	3	2	E,A,E,A,E	1	0	1	0
262	<35	ICSI	6	6	0	E,E,E,E,E,E	0	0	0		1		1	0	1	0
263	<35	IVF	3	2	1	A,E,E	1	1	0		1		0				1			0
264	<35	IVF	11	8	3	E,E,A,E,A,E,E,E,E,A,E	0	0	0		1		0				1			1	0	1	0
265	<35	ICSI	4	4	0	E,E,E,E	1	0	1	0
266	35-37	ICSI	1	1	0	E	0	0	0
267	<35	IVF	11	6	5	E,E,A,A,E,A,E,E,A,A,E	1	0	1	0
268	<35	ICSI	5	3	2	A,E,E,E,A	1	0	1	0
269	<35	ICSI	4	2	2	E,E,A,A	0	0	0		1		1	0	1	1
270	38-39	ICSI	7	3	4	A,E,E,E,A,A,A	0				1		1	0	1	0
271	35-37	IVF	4	4	0	E,E,E,E	0	0	0		1		0				1			1	0	1	0
272	<35	ICSI	4	1	3	A,E,A,A	1	0	1	0
273	<35	ICSI	0	0	0
274	<35	ICSI	0	0	0
275	<35	IVF	7	6	1	A,E,E,E,E,E,E	0				1		0				1			0				1		1	0	1	0
276	<35	ICSI	9	7	2	E,A,E,E,E,E,A,E,E	0	0	0		1		0				1			0				1		1	0	1	0
277	35-37	ICSI	6	3	3	E,E,E,A,A,A	0	0	0		1		1	0	1	0
278	35-37	IVF	3	1	2	A,E,A	1	0	1	0
279	<35	ICSI	4	3	1	E,E,E,A	1	0	1	0
280	<35	Aban	0	0	0
281	<35	ICSI	7	6	1	A,E,E,E,E,E,E	1	0	1	0
282	<35	ICSI	7	5	2	E,E,E,A,A,E,E	1	1	0		1		1	0	1	0
283	<35	ICSI	9	3	6	E,A,A,A,A,E,E,A,A	1	1	0		1		0				1			0				1		1	0	1	0
284	<35	ICSI	8	8	0	E,E,E,E,E,E,E,E	0	0	0		1		0				1			0				1		0				1		0				1		0				1	0				1	1	0
285	<35	ICSI	2	1	1	A,E	1	0	1	0
286	38-39	ICSI	1	0	1	A	0
287	<35	IVF	9	7	2	E,A,E,E,E,E,E,A,E	1	0	1	0
288	38-39	ICSI	12	2	10	A,A,A,A,A,A,E,E,A,A,A,A	1	0	1	0
289	<35	ICSI	8	3	5	A,A,E,A,E,A,A,E	0				1		1	0	1	0
290	35-37	ICSI	2	1	1	A,E	0				1		0
291	38-39	ICSI	1	1	0	E	1	0	1	0
292	<35	ICSI	5	3	2	E,A,E,A,E	0	0	0		1		0				1			0				1		0				1		0
293	35-37	ICSI	7	6	1	A,E,E,E,E,E,E	0				1		0				1			0				1		0				1		0				1		0				1	0
294	35-37	IVF	3	1	2	A,A,E	0				1		0				1			0
295	35-37	IVF	4	3	1	E,E,A,E	0	0	0		1		0				1			0				1		0
296	35-37	ICSI	0	0	0
297	<35	ICSI	8	6	2	E,E,E,A,E,E,A,E	1	0	1	0
298	<35	ICSI	4	2	2	E,E,A,A	0	0	0		1		0				1			0				1		0
299	<35	IVF	5	5	0	E,E,E,E,E	0	0	0		1		0				1			0				1		0				1		1	0	1	0
300	38-39	ICSI	4	2	2	E,A,E,A	1	0	1	0
301	35-37	ICSI	10	8	2	E,E,E,E,E,A,E,A,E,E	0	0	0		0	1	0				0	1		0				1		1	0	1	0
302	<35	Aban	0	0	0
303	<35	IVF	0	0	0
304	<35	ICSI	5	4	1	E,E,E,A,E	1	0	1	0
305	35-37	ICSI	3	3	0	E,E,E	1	0	1	0
306	<35	ICSI	4	3	1	A,E,E,E	0				1		1	0	1	0
307	<35	ICSI	2	1	1	A,E	1	0	1	0
308	<35	ICSI	3	2	1	E,A,E	1	0	1	0
309	35-37	ICSI	5	1	4	A,A,A,E,A	0				0	1	0				1			0				1		0
310	38-39	ICSI	4	3	1	E,E,E,A	0	0	0		0	1	0				1			0
311	<35	IVF	3	1	2	A,A,E	1	0	1	0
312	<35	ICSI	0	0	0
313	<35	ICSI	3	3	0	E,E,E	0	0	0		1		1	0	1	0
314	35-37	ICSI	2	1	1	E,A	0	0	0		1		0
315	<35	ICSI	4	4	0	E,E,E,E	0	0	0		1		0				1			0				1		0
316	35-37	ICSI	8	5	3	E,E,A,A,E,A,E,E	0	0	0		1		0				1			1	0	1	0
317	<35	ICSI	7	7	0	E,E,E,E,E,E,E	1	0	1	0
318	<35	IVF	9	7	2	E,E,A,E,A,E,E,E,E	0	0	0		1		0				1			0				1		1	0	1	0
319	<35	ICSI	9	7	2	E,E,E,E,E,A,A,E,E	0	0	0		1		0				0	1		0				1		0				1		0				1		1	0	1	0
320	<35	ICSI	11	7	4	E,E,E,A,A,E,A,E,E,A,E	0	0	0		1		0				1			1	0	1	0
321	<35	ICSI	11	7	4	E,E,E,A,E,E,A,A,A,E,E	1	0	1	0
322	<35	Aban	0	0	0
323	<35	ICSI	3	2	1	E,E,A	1	0	1	0
324	<35	IVF	5	4	1	E,E,E,A,E	0	0	0		1		0				1			0				1		0				1		0
325	<35	IVF	2	2	0	E,E	1	0	1	0
326	<35	IVF	3	1	2	E,A,A	0	0	0		1		0				1			0
327	<35	ICSI	4	2	2	A,E,E,A	0				1		0				1			0				1		0
328	38-39	Aban	0	0	0
329	<35	ICSI	7	4	3	A,E,A,E,A,E,E	0				0	1	0				1			1	0	1	0
330	<35	IVF	0	0	0
331	35-37	ICSI	3	2	1	A,E,E	0				1		0				1			0
332	35-37	ICSI	6	4	2	E,E,A,E,E,A	0	0	0		1		0				1			1	0	1	0
333	<35	IVF	8	7	1	E,E,E,E,E,A,E,E	0	0	0		1		1	0	1	0
334	<35	ICSI	2	1	1	E,A	1	0	1	0
335	<35	IVF	4	3	1	E,E,A,E	0	0	0		1		0				1			0				1		0
336	<35	ICSI	9	5	4	A,E,E,A,A,E,E,A,E	0				1		1	0	1	0
337	<35	ICSI	4	1	3	A,E,A,A	0				1		0				1			0				1		0
338	<35	ICSI	5	4	1	E,E,E,A,E	1	0	1	0
339	<35	ICSI	11	8	3	E,E,A,E,E,A,A,E,E,E,E	0	0	0		0	1	0				1			0				1		0				1		1	0	1	0
340	<35	ICSI	6	1	5	E,A,A,A,A,A	1	0	1	0
341	38-39	IVF	2	0	2	A,A	0				1		0
342	<35	ICSI	0	0	0
343	<35	IVF	0	0	0
344	35-37	ICSI	5	3	2	A,E,E,E,A	0				1		0				1			0				1		0				1		0
345	<35	ICSI	9	4	5	E,E,E,A,A,A,E,A,A	0	0	0		1		1	0	1	0
346	38-39	IVF	7	5	2	E,E,E,E,A,A,E	1	0	1	0
347	<35	ICSI	9	6	3	E,E,A,E,A,A,E,E,A	0	0	0		1		0				1			0				1		1	0	1	0
348	<35	ICSI	5	4	1	E,E,E,A,E	0	0	0		1		1	0	1	0
349	35-37	ICSI	0	0	0
350	<35	ICSI	0	0	0
351	<35	Aban	0	0	0
352	35-37	ICSI	2	2	0	E,E	1	0	1	0
353	<35	ICSI	0	0	0
354	38-39	ICSI	1	1	0	E	0	0	0
355	35-37	IVF	0	0	0
356	<35	ICSI	4	3	1	A,E,E,E	0				1		0				1			0				1		1	0	1	0
357	38-39	IVF	8	7	1	E,E,E,E,E,E,E,A	0	0	0		1		0				1			0				1		1	0	1	0
358	35-37	IVF	4	1	3	A,A,A,E	0				1		0				1			0				0
359	35-37	IVF	0	0	0
360	<35	ICSI	4	2	2	A,A,E,E	1	0	1	0
361	<35	ICSI	4	2	2	E,A,E,A	0	0	0		1		0				1			0				1		0
362	<35	ICSI	4	4	0	E,E,E,E	0	0	0		1		0				1			0				1		1	0	1	0
363	<35	IVF	4	3	1	E,A,E,E	0	0	0		1		0				1			0				1		0
364	<35	ICSI	7	6	1	E,E,E,A,E,E,E	0	0	0		1		0				1			0				1		0				1		1	1	0		1		1	0	1	0
365	35-37	IVF	0	0	0
366	<35	ICSI	0	0	0
367	38-39	ICSI	7	4	3	E,E,A,A,A,E,E	0	0	0		1		1	0	1	0
368	<35	IVF	6	5	1	A,E,E,E,E,E	1	0	1	0
369	<35	ICSI	2	1	1	A,E	0				1		0
370	<35	ICSI	6	3	3	A,E,A,A,E,E	1	0	1	0
371	<35	IVF	5	3	2	E,E,A,A,E	1	0	1	0
372	<35	ICSI	3	1	2	E,A,A	0	0	0		1		0				0
373	38-39	ICSI	7	3	4	A,A,A,A,E,E,E	0				1		0				1			0				1		0				1		0				1		0				1	0
374	<35	ICSI	5	5	0	E,E,E,E,E	1	0	1	0
375	35-37	ICSI	2	1	1	A,E	0				1		0
376	<35	IVF	3	3	0	E,E,E	1	0	1	0
377	<35	IVF	1	0	1	A	0
378	<35	IVF	2	1	1	E,A	1	0	1	0
379	<35	ICSI	3	1	2	A,A,E	1	0	1	0
380	38-39	IVF	2	0	2	A,A	0				1		0
381	<35	ICSI	7	3	4	E,E,A,A,E,A,A	0	0	0		1		1	0	1	0
382	<35	IVF	4	4	0	E,E,E,E	0	0	0		1		0				1			1	0	1	0
383	35-37	IVF	1	1	0	E	0	0	0
384	35-37	IVF	4	2	2	A,E,E,A	0				1		1	0	1	0
385	<35	ICSI	6	5	1	E,E,E,A,E,E	1	0	1	0
386	<35	IVF	0	0	0
387	<35	IVF	4	2	2	E,E,A,A	0	0	0		0	1	0				1			0
388	<35	ICSI	0	0	0
389	35-37	ICSI	14	10	4	E,E,E,E,E,A,A,A,E,E,E,E,A,E	1	1	0		1		0				1			1	0	1	0
390	<35	ICSI	3	2	1	E,A,E	1	0	1	0
391	<35	ICSI	5	3	2	E,A,A,E,E	1	0	1	0
392	<35	ICSI	9	5	4	E,E,A,E,A,A,E,A,E	0	0	0		1		0				1			1	0	1	0
393	<35	ICSI	3	2	1	A,E,E	0				1		1	0	1	0
394	<35	ICSI	5	5	0	E,E,E,E,E	0	0	0		1		0				1			1	0	1	1
395	<35	ICSI	9	7	2	E,E,E,E,E,A,A,E,E	1	1	0		1		1	0	1	0
396	<35	ICSI	5	5	0	E,E,E,E,E	1	0	1	0
397	<35	IVF	7	5	2	A,A,E,E,E,E,E	1	0	1	0
398	<35	ICSI	5	3	2	E,E,A,E,A	1	0	1	0
399	<35	ICSI	8	5	3	A,A,E,E,A,E,E,E	0				1		1	0	1	0
400	35-37	IVF	4	1	3	E,A,A,A	1	0	1	0
401	35-37	ICSI	5	4	1	E,E,E,A,E	0	0	0		1		0				1			0				1		0				1		0
402	<35	ICSI	4	4	0	E,E,E,E	0	0	0		1		0				1			1	0	1	0
403	<35	IVF	6	4	2	E,A,A,E,E,E	0	0	0		1		1	0	1	0
404	<35	ICSI	0	0	0
405	<35	ICSI	13	11	2	E,E,E,E,E,E,E,E,A,E,A,E,E	1	0	1	0
406	<35	ICSI	5	1	4	A,E,A,A,A	0				1		0				0	1		0				1		0
407	<35	IVF	3	3	0	E,E,E	0	0	0		1		0				1			0
408	35-37	ICSI	7	3	4	E,E,A,E,A,A,A	1	0	1	0
409	35-37	IVF	9	4	5	E,A,A,A,E,A,E,A,E	1	0	1	0
410	<35	IVF	2	1	1	A,E	1	1	0		1		0
411	<35	ICSI	4	3	1	E,E,A,E	0	0	0		1		0				1			1	0	1	0
412	35-37	ICSI	2	2	0	E,E	0	0	0		1		0
413	<35	ICSI	4	3	1	A,E,E,E	0				1		0				1			1	0	1	0
414	<35	ICSI	4	4	0	E,E,E,E	1	0	1	0
415	<35	ICSI	4	2	2	E,A,E,A	1	0	1	0
416	38-39	ICSI	0	0	0
417	35-37	ICSI	3	2	1	A,E,E	0				1		0				1			0
418	35-37	ICSI	5	2	3	A,E,A,A,E	0				1		0				1			1	0	1	0
419	<35	ICSI	5	3	2	E,A,E,A,E	0	0	0		1		1	0	1	0
420	<35	IVF	8	7	1	E,E,E,E,E,E,E,A	0	0	0		1		1	0	1	0
421	35-37	ICSI	4	2	2	A,A,E,E	0				0	1	0				1			0
422	<35	IVF	2	1	1	A,E	0				1		0
423	<35	IVF	8	6	2	A,E,E,E,A,E,E,E	1	0	1	0
424	<35	IVF	0	0	0
425	<35	IVF	2	1	1	A,E	1	0	1	0
426	35-37	IVF	14	8	6	E,A,A,E,A,E,A,A,E,E,E,E,E,A	0	0	0		1		0				1			1	0	1	0
427	<35	IVF	5	4	1	E,E,A,E,E	0	0	0		1		1	0	1	0
428	<35	ICSI	5	4	1	E,E,E,A,E	0	0	0		1		0				1			1	1	0		1		0				1		0
429	<35	ICSI	3	2	1	A,E,E	1	0	1	0
430	<35	ICSI	4	2	2	A,E,A,E	1	0	1	0
431	<35	ICSI	3	2	1	E,A,E	1	0	1	0
432	<35	ICSI	6	6	0	E,E,E,E,E,E	1	0	1	0
433	<35	ICSI	2	2	0	E,E	0	0	0		0
434	<35	ICSI	7	4	3	E,E,E,A,A,E,A	0	0	0		1		0				1			1	0	1	0
435	<35	ICSI	11	8	3	E,E,A,A,E,E,E,E,E,A,E	0	0	0		1		0				1			0				1		1	0	1	0
436	35-37	IVF	2	2	0	E,E	0	0	0		1		0
437	<35	IVF	3	2	1	A,E,E	0				1		1	0	1	0
438	<35	IVF	6	4	2	A,A,E,E,E,E	1	0	1	0
439	<35	ICSI	4	4	0	E,E,E,E	0	0	0		1		0				0	0
440	<35	IVF	2	2	0	E,E	1	0	1	0
441	<35	IVF	4	3	1	E,E,E,A	0	0	0		1		1	0	1	0
442	35-37	ICSI	5	4	1	E,E,A,E,E	1	0	1	0
443	<35	ICSI	0	0	0
444	38-39	ICSI	7	4	3	E,E,A,E,A,A,E	1	0	1	0
445	35-37	ICSI	5	3	2	A,E,E,A,E	1	0	1	0
446	<35	ICSI	9	6	3	E,E,E,A,E,A,A,E,E	1	0	1	0
447	38-39	ICSI	4	2	2	A,A,E,E	1	0	1	0
448	<35	ICSI	10	4	6	E,E,A,E,A,E,A,A,A,A	0	0	0		1		0				1			1	0	1	0
449	35-37	ICSI	5	3	2	E,E,A,E,A	1	0	1	0
450	35-37	ICSI	6	4	2	A,A,E,E,E,E	1	0	1	0
451	35-37	ICSI	0	0	0
452	35-37	ICSI	8	6	2	E,E,E,A,A,E,E,E	0	0	0		1		1	0	1	0
453	35-37	ICSI	5	2	3	E,A,A,E,A	1	0	1	0
454	35-37	ICSI	4	3	1	E,E,E,A	0	0	0		1		1	0	1	0
455	<35	IVF	4	2	2	A,A,E,E	0				1		0				1			0				1		0
456	<35	ICSI	4	3	1	E,E,E,A	0	0	0		1		0				1			0				1		0
457	<35	ICSI	6	5	1	E,E,A,E,E,E	0	0	0		1		1	0	1	0
458	<35	IVF	5	1	4	A,A,E,A,A	1	0	1	0
459	35-37	IVF	7	5	2	E,E,E,A,E,E,A	0	0	0		1		1	1	0		1			1	0	1	0
460	<35	ICSI	13	10	3	E,E,E,A,E,A,E,A,E,E,E,E	1	1	0		1		1	0	1	0
461	38-39	ICSI	2	0	2	A,A	0				1		0
462	<35	ICSI	2	1	1	A,E	0				1		0
463	35-37	ICSI	1	1	0	E	1	0	1	0
464	<35	ICSI	11	8	3	E,E,E,E,A,A,E,E,E,A,E	1	0	1	0
465	35-37	ICSI	0	0	0
466	35-37	ICSI	2	1	1	A,E	1	0	1	0
467	<35	ICSI	7	7	0	E,E,E,E,E,E,E	0	0	0		0	1	0				1			0				1		0				1		0				1		1	0	1	0
468	35-37	ICSI	3	3	0	E,E,E	1	0	1	0
469	<35	IVF	5	3	2	E,E,A,E,A	0	0	0		1		1	0	1	0
470	35-37	IVF	5	4	1	A,E,E,E,E	1	0	1	0
471	<35	ICSI	2	2	0	E,E	0	0	0		1		0
472	<35	ICSI	2	2	0	E,E	0	0	0		1		1	0	1	0
473	38-39	IVF	2	0	2	A,A	0				1		0
474	<35	ICSI	5	3	2	A,E,A,E,A	1	0	1	0
475	<35	ICSI	5	4	1	E,E,E,E,A	0	0	0		1		0				1			1	0	1	0
476	<35	IVF	5	5	0	E,E,E,E,E	0	0	0		0	1	0				1			1	0	1	0
477	<35	ICSI	7	6	1	E,E,E,A,E,E,E	1	0	1	0
478	35-37	ICSI	3	3	0	E,E,E	1	0	1	0
479	<35	Aban	0	0	0
480	<35	ICSI	4	4	0	E,E,E,E	0	0	0		1		0				0	1		1	0	1	0
481	<35	ICSI	7	7	0	E,E,E,E,E,E,E	0	0	0		1		1	0	1	0
482	<35	IVF	3	3	0	E,E,E	0	0	0		0	1	0
483	<35	IVF	4	2	2	E,A,E,A	0	0	0		1		0				1			0				1		0
484	<35	ICSI	6	6	0	E,E,E,E,E,E	0	0	0		1		0				1			0				1		1	0	1	0
485	<35	ICSI	2	2	0	E,E	0	0	0		1		1	0	1	0
486	<35	ICSI	6	3	3	E,A,A,E,E,A	0	0	0		1		1	0	1	0
487	<35	ICSI	0	0	0
488	<35	ICSI	2	2	0	E,E	1	0	1	0
489	35-37	ICSI	6	3	3	E,E,A,A,E,A	1	0	1	0
490	<35	ICSI	3	2	1	A,E,E	1	0	1	0
491	35-37	IVF	0	0	0
492	<35	ICSI	1	1	0	E	1	1	0
493	<35	ICSI	7	6	1	E,E,E,E,E,E,A	1	0	1	0
494	35-37	IVF	4	2	2	E,E,A,A	0	0	0		1		1	0	1	0
495	<35	ICSI	6	5	1	E,E,E,E,E,A	0	0	0		1		0				1			0				1		0				1		1	0	1	0
496	35-37	ICSI	6	3	3	E,A,E,A,A,E	1	0	1	0
497	38-39	ICSI	5	2	3	A,A,E,A,E	0				1		1	0	1	0
498	<35	IVF	5	3	2	E,A,E,E,A	1	0	1	0
499	<35	ICSI	6	4	2	E,E,A,A,E,E	1	0	1	0
500	35-37	ICSI	4	4	0	E,E,E,E	0	0	0		1		0				1			1	0	1	0
501	<35	IVF	4	3	1	E,E,E,A	0	0	0		1		1	0	1	0
502	<35	IVF	8	5	3	E,A,E,E,A,A,E,E	1	0	1	0
503	<35	ICSI	6	4	2	E,E,A,E,E,A	1	0	1	0
504	<35	ICSI	5	4	1	E,E,E,E,A	0	0	0		1		0				1			0				1		0				1		0
505	<35	ICSI	9	7	2	E,A,E,E,A,E,E,E,E	0	0	0		1		1	0	1	0
506	<35	ICSI	9	6	3	E,E,A,E,E,A,A,E,E	0	0	0		1		1	0	1	0
507	<35	ICSI	5	5	0	E,E,E,E,E	0	0	0		1		0				1			1	0	1	0
508	<35	IVF	7	7	0	E,E,E,E,E,E,E	0	0	0		1		0				0	1		1	0	1	0
509	35-37	ICSI	6	5	1	E,A,E,E,E,E	0	0	0		1		1	0	1	0
510	<35	ICSI	7	5	2	E,E,A,A,E,E,E	1	0	1	0
511	<35	IVF	5	5	0	E,E,E,E,E	1	0	1	0
512	<35	ICSI	0	0	0
513	35-37	ICSI	4	4	0	E,E,E,E	0	0	0		1		1	0	1	0
514	<35	ICSI	0	0	0
515	<35	ICSI	7	5	2	E,A,A,E,E,E,E	0	0	0		1		1	0	1	0
516	35-37	IVF	1	1	0	E	0	0	0
517	<35	ICSI	4	4	0	E,E,E,E	0	0	0		1		1	0	1	0
518	<35	IVF	3	3	0	E,E,E	1	0	1	0
519	<35	ICSI	4	4	0	E,E,E,E	0	0	0		1		1	0	1	0
520	<35	Aban	0	0	0
521	38-39	ICSI	4	3	1	E,E,A,E	0	0	0		1		0				1			1	0	1	0
522	<35	IVF	4	3	1	E,E,A,E	0	0	0		1		0				1			1	0	1	0
523	<35	IVF	2	1	1	A,E	1	0	1	0
524	35-37	IVF	1	1	0	E	1	0	1	0
525	<35	ICSI	4	3	1	A,E,E,E	1	0	1	0
526	38-39	IVF	1	0	1	A	0
527	<35	ICSI	0	0	0
528	<35	ICSI	4	3	1	E,E,E,A	0	0	0		1		0				1			0				1		0
529	<35	ICSI	4	3	1	E,E,A,E	1	0	1	0
530	<35	IVF	5	4	1	E,E,A,E,E	1	1	0		1		0				1			0				1		1	0	1	0
531	38-39	ICSI	2	0	2	A,A	0				1		0
532	35-37	ICSI	3	1	2	A,A,E	0				1		0				1			0
533	35-37	IVF	6	3	3	E,A,A,A,E,E	1	0	1	0
534	<35	ICSI	0	0	0
535	<35	IVF	8	6	2	E,A,E,E,E,E,A,E	0	0	0		1		1	0	1	0
536	<35	ICSI	4	2	2	A,A,E,E	0				1		1	0	1	0
537	38-39	IVF	7	4	3	E,E,A,E,A,A,E	0	0	0		1		1	0	1	0
538	35-37	ICSI	0	0	0
539	<35	ICSI	4	2	2	E,A,E,A	1	0	1	0
540	<35	IVF	11	8	3	E,E,A,E,E,E,A,E,E,A,E	1	0	1	0
541	35-37	IVF	6	3	3	A,E,E,A,A,E	0				1		0				1			0				1		0				1		0				1		0
542	38-39	ICSI	2	1	1	E,A	0	0	0		1		0
543	<35	ICSI	5	3	2	E,E,A,A,E	1	0	1	0
544	<35	ICSI	11	9	2	A,E,E,E,E,E,A,E,E,E,E	1	0	1	0
545	38-39	ICSI	3	2	1	A,E,E	0				1		1	0	1	0
546	38-39	ICSI	1	1	0	E	1	0	1	0
547	<35	ICSI	2	2	0	E,E	0	0	0		1		0
548	<35	ICSI	6	4	2	E,A,E,E,E,A	0	0	0		1		0				1			1	0	1	0
549	<35	ICSI	7	5	2	A,E,E,E,E,A,E	0				1		1	0	1	0
550	<35	ICSI	9	8	1	E,E,E,E,E,E,E,E,A	1	1	0		1		1	0	1	0
551	<35	ICSI	6	4	2	E,E,E,E,A,A	0	0	0		1		0				1			1	0	1	0
552	35-37	IVF	1	1	0	E	0	0	0
553	<35	ICSI	4	3	1	E,E,A,E	0	0	0		1		0				1			1	0	1	0
554	<35	IVF	4	3	1	E,A,E,E	0	0	0		0	1	1	0	1	0
555	<35	IVF	4	1	3	A,A,A,E	0				1		0				1			0				1		0
556	38-39	IVF	4	2	2	E,A,A,E	1	0	1	0
557	<35	ICSI	5	2	3	E,A,E,A,A	1	0	1	0
558	35-37	IVF	14	9	5	A,A,E,A,E,A,E,E,A,E,E,E,E,E	0				1		1	0	1	0
559	<35	ICSI	2	2	0	E,E	0	0	0		1		0
560	<35	ICSI	2	2	0	E,E	0	0	0		1		1	0	1	0
561	<35	ICSI	2	2	0	E,E	1	1	0		1		0
562	35-37	ICSI	4	3	1	E,E,E,A	1	0	1	0
563	35-37	ICSI	3	3	0	E,E,E	1	0	1	0
564	38-39	IVF	2	2	0	E,E	1	0	1	0
565	<35	ICSI	7	6	1	E,A,E,E,E,E,E	0	0	0		1		1	0	1	0
566	<35	IVF	2	2	0	E,E	0	0	0		1		0
567	<35	ICSI	5	3	2	A,A,E,E,E	1	0	1	0
568	35-37	ICSI	7	4	3	A,E,E,A,E,A,A	1	0	1	0
569	<35	ICSI	0	0	0
570	<35	ICSI	4	1	3	E,A,A,A	1	0	1	0
571	35-37	ICSI	4	2	2	E,A,A,E	0	0	0		1		1	1	0	0	1			0				1		0
572	<35	ICSI	7	5	2	E,A,E,E,E,A,E	0	0	0		1		0				1			0				1		1	0	1	0
573	<35	IVF	6	4	2	E,E,E,E,A,A	1	0	1	0
574	<35	ICSI	9	7	2	A,E,A,E,E,E,E,E,E	0				0	1	0				0	0	1	0				1		1	0	1	0
575	35-37	IVF	5	3	2	A,A,E,E,E	0				1		1	0	1	0
576	<35	IVF	4	2	2	E,E,A,A	0	0	0		1		0				1			0				1		0
577	<35	ICSI	9	8	1	E,E,E,E,E,A,E,E,E	0	0	0		0	1	0				1			1	0	1	0
578	<35	IVF	7	7	0	E,E,E,E,E,E,E	1	0	1	0
579	35-37	ICSI	0	0	0
580	35-37	ICSI	10	5	5	E,A,E,A,E,E,A,A,E,A	0	0	0		0	1	1	0	1	0
581	<35	IVF	10	10	0	E,E,E,E,E,E,E,E,E,E	0	0	0		1		1	0	1	0
582	<35	IVF	0	0	0
583	<35	IVF	8	5	3	E,A,E,E,A,E,E,A	0	0	0		1		0				1			0				1		1	0	1	0
584	38-39	IVF	5	3	2	E,A,E,E,A	0	0	0		1		1	0	1	0
585	35-37	IVF	4	2	2	E,E,A,A	0	0	0		1		1	0	1	0
586	<35	ICSI	5	4	1	E,E,E,E,A	1	0	1	0
587	<35	ICSI	0	0	0
588	<35	IVF	12	8	4	A,E,E,E,E,E,E,A,A,E,E,A	1	0	1	0
589	35-37	IVF	6	3	3	E,E,A,A,E,A	0	0	0		1		1	0	1	0
590	<35	IVF	2	1	1	E,A	1	0	1	0
591	38-39	ICSI	0	0	0
592	<35	ICSI	0	0	0
593	<35	ICSI	3	3	0	E,E,E	0	0	0		1		0				1			0
594	38-39	IVF	0	0	0
595	<35	ICSI	7	6	1	A,E,E,E,E,E,E	0				1		1	0	1	0
596	<35	ICSI	2	2	0	E,E	0	0	0		1		1	0	1	0
597	35-37	ICSI	5	4	1	A,E,E,E,E	1	0	1	0
598	35-37	ICSI	0	0	0
599	<35	ICSI	5	3	2	E,E,E,A,A	1	0	1	0
600	<35	IVF	5	3	2	A,E,E,A,E	1	0	1	0
601	38-39	ICSI	2	1	1	A,E	1	0	1	0
602	<35	Aban	0	0	0
603	<35	ICSI	9	5	4	A,E,A,E,E,A,E,E,A	0				0	1	0				1			0				1		0				1		0				1		0				1	0				1	0
604	<35	ICSI	0	0	0
605	<35	IVF	8	3	5	A,A,A,E,E,A,E,A	1	0	1	0
606	<35	ICSI	3	2	1	A,E,E	0				1		0				1			1	0	1	0
607	38-39	ICSI	2	1	1	E,A	1	1	0		1		0
608	<35	ICSI	5	4	1	E,E,E,A,E	1	1	0		1		0				1			0				1		0				1		0
609	<35	ICSI	5	5	0	E,E,E,E,E	0	0	0		1		1	0	1	0
610	35-37	ICSI	1	1	0	E	0	0	0
611	<35	IVF	3	2	1	E,E,A	0	0	0		1		1	0	1	0
612	38-39	ICSI	2	0	2	A,A	0				1		0
613	35-37	ICSI	6	2	4	E,A,A,A,E,A	0	0	0		1		1	0	1	0
614	<35	ICSI	5	3	2	A,E,E,E,A	1	0	1	0
615	<35	IVF	3	3	0	E,E,E	0	0	0		1		1	0	1	0
616	<35	ICSI	9	4	5	E,A,A,E,E,A,A,A,E	1	0	1	0
617	<35	IVF	5	2	3	A,A,A,E,E	1	0	1	0
618	35-37	ICSI	1	1	0	E	1	0	1	0
619	35-37	ICSI	2	2	0	E,E	0	0	0		1		1	0	1	0
620	38-39	ICSI	0	0	0
621	<35	ICSI	10	7	3	E,A,A,E,E,E,E,E,A,E	0	0	0		1		0				1			0				1		0				1		0				1		0				1	1	0	1	0
622	38-39	ICSI	7	3	4	A,E,E,A,A,E,A	1	1	0		1		1	0	1	0
623	<35	ICSI	4	4	0	E,E,E,E	1	0	1	0
624	35-37	ICSI	1	0	1	A	0	0	0
625	35-37	IVF	4	3	1	A,E,E,E	1	0	1	0
626	35-37	ICSI	3	2	1	E,A,E	0	0	0		1		1	0	1	0
627	35-37	ICSI	4	1	3	A,A,E,A	0				1		0				1			0				1		0
628	<35	ICSI	7	6	1	E,E,E,E,A,E,E	1	0	1	0
629	<35	IVF	5	4	1	A,E,E,E,E	0				1		0				1			0				1		0				1		0
630	<35	ICSI	5	4	1	E,E,E,E,A	0	0	0		1		0				1			0				1		0				1		0
631	35-37	ICSI	2	0	2	A,A	0	0	0		1		0
632	38-39	ICSI	5	4	1	A,E,E,E,E	1	0	1	0
633	<35	IVF	5	3	2	A,E,E,A,E	0				1		1	0	1	0
634	<35	IVF	11	7	4	E,E,A,E,E,E,E,A,E,A,A	1	0	1	0
635	<35	ICSI	7	3	4	E,E,A,A,E,A,A	0	0	0		1		0				1			0				1		0				1		0				1		0				1	0
636	35-37	ICSI	5	4	1	E,A,E,E,E	1	0	1	0
637	<35	ICSI	4	3	1	E,A,E,E	0	0	0		1		1	0	1	0
638	35-37	ICSI	1	1	0	E	1	0	1	0
639	<35	IVF	8	8	0	E,E,E,E,E,E,E,E	0	0	0		1		0				1			0				1		1	0	1	0
640	<35	ICSI	5	3	2	E,A,E,A,E	1	0	1	0
641	<35	ICSI	0	0	0
642	<35	ICSI	9	8	1	E,E,E,A,E,E,E,E,E	0	0	0		1		0				1			0				1		1	0	1	0
643	<35	ICSI	0	0	0
644	<35	ICSI	11	6	5	E,E,E,A,E,A,A,E,A,A,E	1	0	1	0
645	<35	ICSI	5	5	0	E,E,E,E,E	0	0	0		1		1	0	1	0
646	<35	ICSI	3	2	1	E,E,A	1	0	1	0
647	<35	ICSI	10	9	1	E,E,E,E,E,E,E,A,E,E	0	0	0		1		0				1			0				1		0				1		0				1		0				1	1	0	1	0
648	38-39	ICSI	2	0	2	A,A	0				1		0
649	<35	ICSI	11	9	2	E,E,A,E,E,E,E,E,E,A,E	0	0	0		1		1	0	1	0
650	<35	IVF	4	3	1	E,E,E,A	1	1	0		1		0				1			1	0	1	0
651	35-37	ICSI	1	1	0	E	0	0	0
652	<35	ICSI	3	2	1	E,E,A	0	0	0		1		0				0
653	<35	IVF	7	4	3	E,A,A,E,E,A,E	1	0	1	0
654	<35	ICSI	9	8	1	E,A,E,E,E,E,E,E,E	1	0	1	0
655	<35	ICSI	5	2	3	A,E,E,A,A	1	0	1	0
656	<35	IVF	4	4	0	E,E,E,E	1	0	1	0
657	<35	IVF	7	6	1	E,E,E,E,E,E,A	0	0	0		1		1	0	1	0
658	<35	ICSI	5	5	0	E,E,E,E,E	0	0	0		1		1	0	1	0
659	<35	ICSI	2	2	0	E,E	0	0	0		1		1	0	1	0
660	<35	ICSI	5	4	1	E,E,E,A,E	0	0	0		1		0				1			0				0	1	0
661	<35	ICSI	9	6	3	E,E,E,A,E,A,E,A,E	1	0	1	0
662	35-37	ICSI	4	4	0	E,E,E,E	1	0	1	0
663	<35	IVF	6	5	1	E,E,A,E,E,E	0	0	0		1		1	0	1	0
664	38-39	ICSI	4	3	1	A,E,E,E	1	0	1	0
665	38-39	ICSI	0	0	0
666	<35	ICSI	7	4	3	E,E,A,A,A,E,A	1	0	1	0
667	<35	IVF	4	3	1	E,E,A,E	0	0	0		1		1	0	1	0
668	<35	ICSI	9	6	3	E,E,E,A,E,A,E,A,E	0	0	0		1		1	0	1	0
669	35-37	IVF	6	3	3	A,E,E,E,A,A	1	0	1	0
670	<35	ICSI	4	2	2	E,A,A,E	0	0	0		1		0				1			0				1		0
671	35-37	ICSI	2	2	0	E,E	0	0	0		1		0
672	<35	ICSI	4	4	0	E,E,E,E	0	0	0		1		0				1			1	0	1	0
673	<35	IVF	7	3	4	E,E,A,A,A,E,A	0	0	0		1		0				1			1	0	1	0
674	<35	IVF	4	2	2	E,A,E,A	0	0	0		1		0				1			0				1		0
675	<35	ICSI	0	0	0
676	38-39	ICSI	0	0	0
677	<35	IVF	3	3	0	E,E,E	0	0	0		1		1	0	1	0
678	<35	ICSI	5	2	3	E,A,A,A,E	0	0	0		1		0				1			0				1		0				1		0
679	<35	IVF	1	1	0	E	0	0	0
680	38-39	ICSI	0	0	0
681	<35	ICSI	2	1	1	A,E	1	0	1	0
682	<35	ICSI	0	0	0
683	<35	ICSI	2	1	1	A,E	1	0	1	0
684	<35	IVF	4	1	3	A,A,E,A	1	0	1	0
685	<35	IVF	4	3	1	E,E,E,A	1	0	1	0
686	<35	ICSI	0	0	0
687	<35	ICSI	3	3	0	E,E,E	1	0	1	0
688	38-39	ICSI	4	0	4	A,A,A,A	0	0	0		1		0				1			0				1		0
689	38-39	ICSI	0	0	0
690	35-37	ICSI	9	1	8	A,A,A,E,A,A,A,A,A	0				1		0				1			0				1		0				1		0				1		0				1	0				1	1	1
691	<35	ICSI	5	3	2	A,E,A,E,A	0				1		0				1			0				1		0				1		0
692	<35	IVF	9	7	2	E,E,E,A,E,E,A,E,E	1	0	1	0
693	<35	ICSI	0	0	0
694	<35	IVF	6	4	2	E,E,A,E,A,E	1	0	1	0
695	38-39	ICSI	9	8	1	E,E,A,E,E,E,E,E,E	1	0	1	0
696	<35	ICSI	3	1	2	A,E,A	1	0	1	0
697	<35	ICSI	2	2	0	E,E	0	0	0		1		1	0	1	0
698	<35	ICSI	6	5	1	E,A,E,E,E,E	1	0	1	0
699	<35	ICSI	6	4	2	E,E,A,E,E,A	1	0	1	0
700	35-37	ICSI	2	1	1	E,A	0	0	0		1		0
701	<35	ICSI	6	2	4	A,A,A,E,E,A	0				1		1	0	1	0
702	<35	IVF	5	4	1	E,E,E,A,E	1	0	1	0
703	38-39	ICSI	1	0	1	A	0
704	38-39	ICSI	7	3	4	A,A,A,A,E,E,E	1	0	1	0
705	<35	ICSI	9	8	1	E,E,E,E,E,E,A,E,E	1	0	1	0
706	35-37	ICSI	6	1	5	A,A,A,E,A,A	0				1		0				1			0				1		0				1		0				1		0
707	<35	IVF	7	6	1	E,E,E,E,A,E,E	1	0	1	0
708	<35	IVF	7	5	2	E,E,E,A,E,E,A	0	0	0		1		0				1			0				1		0				1		0				1		0				1	0
709	<35	ICSI	5	4	1	A,E,E,E,E	0				1		0				1			0				1		1	0	1	0
710	<35	IVF	7	5	2	A,E,E,A,E,E,E	1	0	1	0
711	<35	ICSI	8	5	3	E,E,E,E,A,A,E,A	0	0	0		1		1	0	1	0
712	<35	IVF	6	5	1	E,A,E,E,E,E	0	0	0								1			1	0	1	0
713	38-39	IVF	4	2	2	E,A,A,E	1	1	0		1		0				1			0				1		0
714	<35	ICSI	4	2	2	A,E,A,E	0				1		0				1			0				1		0
715	35-37	IVF	4	4	0	E,E,E,E	1	0	1	0
716	<35	ICSI	3	2	1	E,A,E	0	0	0		1		0				1			0
717	<35	ICSI	6	5	1	A,E,E,E,E,E	0				1		0				1			1	0	1	0
718	35-37	IVF	4	4	0	E,E,E,E	1	0	1	0
719	<35	IVF	11	8	3	E,E,E,A,A,E,E,A,E,E,E	0	0	0		1		0				0	1		1	0	1	0
720	<35	ICSI	7	4	3	E,E,E,A,A,E,A	0	0	0		1		0				1			1	0	1	0
721	<35	ICSI	0	0	0
722	<35	ICSI	4	3	1	E,E,A,E	0	0	0		1		1	0	1	0
723	35-37	ICSI	7	3	4	A,A,A,E,A,E,E	1	0	1	0
724	<35	ICSI	5	2	3	A,E,A,E,A	0				1		0				0	1		0				1		0
725	<35	IVF	3	1	2	A,E,A	1	0	1	0
726	<35	IVF	3	3	0	E,E,E	0	0	0		1		0				1			0
727	<35	ICSI	9	9	0	E,E,E,E,E,E,E,E,E	0	0	0		1		1	0	1	0
728	<35	ICSI	8	3	5	A,A,E,A,E,E,A,A	0				1		0				1			0				1		0				1		0				1		0				1	0				1	0
729	<35	ICSI	3	2	1	A,E,E	1	0	1	0
730	35-37	ICSI	5	3	2	E,E,A,E,A	0	0	0		1		0				1			0				1		0				1		0
731	<35	ICSI	7	3	4	E,A,E,A,A,E,A	1	0	1	0
732	<35	IVF	4	3	1	E,A,E,E	1	0	1	0
733	<35	ICSI	8	6	2	A,E,E,E,E,E,E,A	1	0	1	0
734	35-37	IVF	1	0	1	A	0	0	0
735	<35	IVF	4	3	1	A,E,E,E	0				1		1	0	1	0
736	<35	IVF	3	1	2	A,A,E	0				1		0				1			0
737	<35	ICSI	9	8	1	A,E,E,E,E,E,E,E,E	0				1		0				1			1	0	1	0
738	35-37	IVF	3	2	1	E,E,A	1	0	1	0
739	<35	ICSI	5	4	1	E,A,E,E,E	1	0	1	0
740	<35	ICSI	7	3	4	A,A,E,A,E,E,A	0				1		1	0	1	0
741	<35	ICSI	0	0	0
742	35-37	ICSI	5	5	0	E,E,E,E,E	0	0	0		1		0				1			0				1		1	0	1	0
743	<35	ICSI	4	2	2	E,A,A,E	0	0	0		1		0				1			0				0
744	<35	ICSI	3	3	0	E,E,E	1	0	1	0
745	35-37	ICSI	9	6	3	E,A,E,A,E,E,E,E,A	1	0	1	0
746	<35	ICSI	9	6	3	E,E,E,E,A,E,E,A,A	0	0	0		1		0				1			0				1		1	0	1	0
747	<35	ICSI	5	3	2	A,E,A,E,E	0				1		1	1	0		1			0				1		0				1		0
748	<35	ICSI	5	2	3	A,A,E,A,E	1	0	1	0
749	<35	ICSI	7	5	2	E,A,E,E,E,A,E	0	0	0		1		0				1			1	0	1	0
750	<35	IVF	4	3	1	E,E,E,A	0	0	0		1		1	0	1	0
751	<35	IVF	5	4	1	E,A,E,E,E	1	0	1	0
752	<35	ICSI	11	6	5	E,E,A,A,E,E,E,A,A,A,E	1	0	1	0
753	<35	IVF	7	6	1	E,E,A,E,E,E,E	1	1	0		0	1	0				1			1	0	1	0
754	<35	ICSI	5	5	0	E,E,E,E,E	0	0	0		1		1	0	1	0
755	35-37	ICSI	4	2	2	E,A,E,A	0	0	0		1		0				1			0				1		0
756	35-37	IVF	0	0	0
757	35-37	IVF	1	1	0	E	0	0	0
758	<35	IVF	4	2	2	E,A,A,E	0	0	0		1		0				1			0				1		1	0	1	0
759	35-37	ICSI	1	1	0	E	0	0	0
760	<35	ICSI	6	3	3	A,E,A,A,E,E	0				1		0				1			0				1		0				1		0				1		0
761	<35	ICSI	2	2	0	E,E	1	0	1	0
762	<35	IVF	7	5	2	E,E,E,A,E,E,A	0	0	0		1		0				1			1	0	1	0
763	<35	IVF	9	5	4	E,E,A,E,A,A,E,A,E	0	0	0		1		0				1			0				1		0				1		0				1		0				1	0				1	0
764	38-39	ICSI	4	1	3	E,A,A,A	0	0	0		1		0				1			0				1		0
765	<35	IVF	3	2	1	E,E,A	0	0	0		1		0				1			0
766	<35	ICSI	5	4	1	A,E,E,E,E	0				1		0				1			1	0	1	0
767	<35	IVF	2	1	1	E,A	0	0	0		1		0
768	38-39	ICSI	4	3	1	E,E,E,A	1	0	1	0
769	<35	ICSI	2	2	0	E,E	0	0	0		1		1	1	0
770	35-37	IVF	4	3	1	E,A,E,E	0	0	0		1		1	0	1	0
771	35-37	ICSI	4	4	0	E,E,E,E	1	0	1	0
772	38-39	ICSI	5	4	1	E,E,A,E,E	0	0	0		1		0				1			0				1		0				1		0
773	<35	IVF	4	2	2	E,A,A,E	1	0	1	0
774	<35	ICSI	10	8	2	E,E,E,E,E,E,E,A,E,A	1	1	0		1		0				1			0				1		0				1		0				1		1	0	1	0
775	<35	ICSI	1	1	0	E	0	0	0
776	<35	IVF	3	2	1	E,A,E	0	0	0		1		0				1			0
777	35-37	ICSI	0	0	0
778	35-37	ICSI	0	0	0
779	35-37	ICSI	2	0	2	A,A	0	0	0		1		1	1	0
780	<35	ICSI	0	0	0
781	38-39	ICSI	5	1	4	A,A,A,E,A	0				1		0				0	1		1	0	1	0
782	35-37	ICSI	0	0	0
783	<35	ICSI	3	2	1	E,E,A	0	0	0		1		1	0	1	0
784	<35	IVF	6	6	0	E,E,E,E,E,E	1	0	1	0
785	<35	IVF	3	3	0	E,E,E	1	0	1	0
786	35-37	ICSI	0	0	0
787	38-39	ICSI	0	0	0
788	35-37	ICSI	2	1	1	A,E	0				1		0
789	<35	ICSI	7	5	2	E,A,E,E,A,E,E	0	0	0		1		1	0	1	0
790	35-37	ICSI	0	0	0
791	<35	IVF	9	6	3	E,E,E,A,A,E,E,E,A	0	0	0		1		1	0	1	0
792	<35	ICSI	7	4	3	A,E,A,E,A,E,E	0				1		1	0	1	1
793	<35	ICSI	7	5	2	E,A,E,E,E,E,A	0	0	0		1		1	0	1	0
794	<35	ICSI	3	2	1	E,E,A	0	0	0		1		1	0	1	0
795	<35	ICSI	5	2	3	E,A,E,A,A	0	0	0		1		1	0	1	0
796	<35	IVF	1	1	0	E	0	0	0
797	35-37	ICSI	0	0	0
798	<35	ICSI	4	3	1	E,E,A,E	1	1	0		1		1	0	1	0
799	<35	ICSI	10	4	6	A,E,E,A,E,E,A,A,A,A	1	0	1	0
800	35-37	ICSI	4	4	0	E,E,E,E	1	0	1	0
801	<35	IVF	6	3	3	A,E,A,E,E,A	1	0	1	0
802	<35	IVF	0	0	0
803	<35	ICSI	0	0	0
804	38-39	ICSI	5	3	2	E,A,E,E,A	0	0	0		1		0				1			0				0	1	0
805	<35	ICSI	10	7	3	E,A,A,E,E,E,A,E,E,E	1	0	1	0
806	<35	IVF	14	8	6	E,A,E,A,E,A,A,E,A,E,A,E,E,A	1	0	1	0
807	<35	ICSI	0	0	0
808	<35	ICSI	0	0	0
809	<35	IVF	5	2	3	E,A,A,A,E	0	0	0		1		1	0	1	0
810	<35	ICSI	3	3	0	E,E,E	1	0	1	1
811	<35	ICSI	9	8	1	E,E,E,E,E,E,E,E,A	0	0	0		1		1	0	1	0
812	<35	ICSI	4	2	2	E,A,A,E	0	0	0		1		1	0	1	0
813	35-37	ICSI	0	0	0
814	<35	IVF	9	7	2	A,E,E,A,E,E,E,E,E	0				1		0				1			1	0	1	0
815	<35	ICSI	11	7	4	E,A,E,E,A,A,A,E,E,E,E	0	0	0		1		0				1			1	0	1	0
816	<35	IVF	0	0	0
817	35-37	ICSI	8	4	4	E,A,A,E,A,A,E,E	0	0	0		1		1	0	1	0
818	<35	IVF	4	3	1	E,E,E,A	0	0	0		1		0				1			1	0	1	0
819	<35	IVF	5	5	0	E,E,E,E,E	1	0	1	0
820	35-37	ICSI	4	2	2	A,E,A,E	1	0	1	0
821	35-37	ICSI	6	3	3	A,E,A,E,E,A	1	0	1	0
822	<35	ICSI	5	3	2	E,E,A,E,A	0	0	0		1		0				1			0				0	1	0
823	<35	ICSI	10	8	2	A,E,E,E,E,E,E,E,E,A	1	0	1	0
824	<35	ICSI	4	1	3	A,A,E,A	1	0	1	0
825	<35	ICSI	7	6	1	E,E,E,E,A,E,E	1	0	1	0
826	35-37	ICSI	2	1	1	A,E	0				1		0
827	<35	IVF	6	4	2	A,E,E,A,E,E	1	0	1	0
828	<35	Aban	0	0	0
829	<35	ICSI	3	1	2	E,A,A	0	0	0		1		0				1			0
830	35-37	IVF	6	2	4	E,A,A,E,A,A	1	0	1	0
831	35-37	ICSI	4	2	2	A,E,E,A	0				1		1	0	1	0
832	<35	ICSI	7	6	1	E,E,E,E,A,E,E	0	0	0		1		1	0	1	0
833	35-37	ICSI	5	1	4	A,E,A,A,A	0				1		0				1			1	0	1	0
834	38-39	ICSI	7	4	3	A,E,E,A,E,A,E	0				1		0				1			1	0	1	0
835	<35	ICSI	5	4	1	E,A,E,E,E	0	0	0		1		1	0	1	0
836	<35	ICSI	0	0	0
837	35-37	IVF	8	7	1	E,E,A,E,E,E,E,E	1	0	1	0
838	<35	ICSI	5	5	0	E,E,E,E,E	1	0	1	0
839	<35	IVF	5	5	0	E,E,E,E,E	1	0	1	0
840	38-39	IVF	14	2	12	A,A,E,A,A,A,A,A,A,A,A,E,A,A	1	0	1	0
841	<35	ICSI	7	5	2	E,A,E,E,E,E,A	0	0	0		1		1	0	1	0
842	<35	ICSI	2	1	1	A,E	0				1		0
843	<35	IVF	4	4	0	E,E,E,E	0	0	0		1		0				1			1	0	1	0
844	35-37	ICSI	5	4	1	E,E,E,E,A	1	0	1	0
845	38-39	IVF	0	0	0
846	<35	IVF	5	3	2	A,E,E,A,E	0				1		0				1			0				1		1	1	0		1		0
847	<35	IVF	10	6	4	E,A,E,E,E,A,E,A,E,A	0	0	0		1		1	0	1	0
848	35-37	ICSI	7	6	1	E,E,E,A,E,E,E	0	0	0		1		1	0	1	0
849	<35	IVF	4	3	1	A,E,E,E	1	0	1	0
850	35-37	IVF	0	0	0
851	35-37	IVF	2	1	1	A,E	0				1		0
852	<35	IVF	7	4	3	E,A,E,A,A,E,E	1	0	1	0
853	<35	ICSI	9	5	4	A,E,E,A,E,A,E,A,E	1	0	1	0
854	<35	ICSI	5	4	1	E,A,E,E,E	0	0	0		1		0				1			1	0	1	0
855	35-37	ICSI	14	6	8	E,E,A,E,A,E,A,A,A,A,E,A,A,E	1	0	1	0
856	35-37	ICSI	8	7	1	E,E,E,E,A,E,E,E	1	0	1	0
857	<35	ICSI	3	3	0	E,E,E	1	0	1	0
858	<35	ICSI	4	2	2	A,A,E,E	1	0	1	0
859	<35	ICSI	4	4	0	E,E,E,E	0	0	0		1		0				1			1	0	1	0
860	<35	ICSI	5	4	1	E,A,E,E,E	0	0	0		1		0				0	1		1	0	1	0
861	<35	IVF	5	2	3	A,E,A,A,E	0				1		1	0	1	0
862	<35	IVF	6	4	2	A,E,E,A,E,E	1	0	1	0
863	<35	ICSI	8	6	2	E,A,A,E,E,E,E,E	0	0	0		1		0				1			0				1		1	0	1	0
864	<35	ICSI	7	5	2	A,E,E,E,E,A,E	0				1		1	0	1	0
865	<35	ICSI	1	0	1	A	0
866	38-39	IVF	0	0	0
867	35-37	IVF	3	2	1	A,E,E	0				1		0				1			0
868	35-37	IVF	6	4	2	E,A,E,A,E,E	0	0	0		1		1	0	1	0
869	35-37	ICSI	3	3	0	E,E,E	0	0	0		1		0				1			0
870	35-37	Aban	0	0	0
871	35-37	ICSI	7	6	1	E,E,E,E,A,E,E	0	0	0		1		0				1			1	0	1	0
872	<35	ICSI	4	3	1	E,A,E,E	1	0	1	0
873	<35	ICSI	8	7	1	E,E,E,A,E,E,E,E	1	0	1	0
874	38-39	ICSI	3	2	1	E,A,E	1	0	1	0
875	35-37	ICSI	6	4	2	E,E,A,A,E,E	0	0	0		1		1	0	1	0
876	<35	IVF	5	4	1	E,A,E,E,E	1	0	1	0
877	<35	IVF	6	5	1	E,E,E,E,A,E	1	0	1	0
878	<35	IVF	3	1	2	E,A,A	1	0	1	0
879	<35	ICSI	8	5	3	E,A,E,E,E,E,A,A	0	0	0		1		1	0	1	0
880	<35	ICSI	5	2	3	A,A,E,A,E	1	0	1	0
881	35-37	ICSI	1	0	1	A	0	0	0
882	35-37	IVF	3	1	2	A,A,E	0				1		0				1			0
883	<35	ICSI	14	7	7	E,A,A,E,A,E,A,E,A,E,E,A,E,A	0	0	0		1		0				1			0				1		1	0	1	0
884	<35	IVF	4	3	1	E,E,A,E	0	0	0		1		1	0	1	0
885	<35	ICSI	2	2	0	E,E	0	0	0		1		0
886	<35	IVF	8	5	3	E,E,A,E,E,A,E,A	0	0	0		1		0				1			0				1		1	0	1	0
887	<35	Aban	0	0	0
888	<35	ICSI	4	2	2	A,A,E,E	1	0	1	0
889	38-39	IVF	2	1	1	E,A	0	0	0		1		0
890	38-39	IVF	5	3	2	A,E,E,E,A	0				1		0				1			1	0	1	0
891	35-37	ICSI	0	0	0
892	<35	ICSI	11	10	1	E,E,E,E,E,E,E,A,E,E,E	0	0	0		1		0				1			0				1		0				1		1	0	1	0
893	<35	ICSI	5	3	2	E,A,A,E,E	1	0	1	0
894	<35	ICSI	6	5	1	E,E,A,E,E,E	0	0	0		1		0				1			1	0	1	0
895	35-37	ICSI	7	5	2	A,E,A,E,E,E,E	0				1		1	1	0		1			0				1		1	0	1	0
896	<35	ICSI	7	5	2	E,E,E,E,A,E,A	0	0	0		0	1	1	0	1	0
897	35-37	ICSI	4	2	2	A,E,E,A	0				1		0				1			0				1		0
898	35-37	ICSI	8	6	2	E,E,E,E,E,E,A,A	1	0	1	0
899	<35	IVF	1	1	0	E	0	0	0
900	<35	ICSI	2	2	0	E,E	1	1	0		1		0
901	<35	ICSI	11	8	3	A,E,E,E,E,E,E,A,E,A,E	1	0	1	0
902	35-37	ICSI	2	0	2	A,A	0	0	0		1		0
903	35-37	IVF	0	0	0
904	<35	ICSI	0	0	0
905	38-39	IVF	4	3	1	E,E,E,A	0	0	0		1		1	0	1	0
906	<35	ICSI	2	1	1	A,E	0				1		0
907	<35	ICSI	5	4	1	E,E,E,A,E	1	0	1	0
908	<35	IVF	2	2	0	E,E	1	0	1	0
909	38-39	ICSI	2	1	1	E,A	1	0	1	0
910	<35	IVF	8	6	2	A,E,E,A,E,E,E,E	1	0	1	0
911	35-37	ICSI	6	2	4	E,A,A,E,A,A	0	0	0		1		1	0	1	0
912	<35	IVF	6	3	3	E,E,E,A,A,A	1	0	1	0
913	<35	ICSI	14	9	5	A,E,A,A,E,E,A,E,E,E,E,A,E,E	0				1		0				1			1	0	1	0
914	<35	ICSI	1	1	0	E	0	0	0
915	<35	IVF	4	3	1	E,E,A,E	0	0	0		1		1	0	1	0
916	35-37	IVF	2	2	0	E,E	1	0	1	0
917	35-37	ICSI	4	3	1	E,A,E,E	1	0	1	0
918	<35	ICSI	8	6	2	E,A,E,E,E,A,E,E	0	0	0		1		0				1			1	0	1	0
919	35-37	ICSI	4	3	1	E,E,E,A	1	0	1	0
920	<35	ICSI	10	6	4	E,E,A,E,E,A,A,E,E,A	0	0	0		1		0				1			1	0	1	0
921	35-37	ICSI	0	0	0
922	38-39	IVF	0	0	0
923	<35	ICSI	4	3	1	E,E,A,E	0	0	0		1		1	0	1	0
924	<35	ICSI	2	2	0	E,E	0	0	0		0
925	38-39	ICSI	0	0	0
926	<35	ICSI	6	2	4	A,E,E,A,A,A	1	1	0		1		1	0	1	0
927	<35	ICSI	3	2	1	E,E,A	1	0	1	0
928	38-39	ICSI	4	3	1	A,E,E,E	0				1		1	1	0	0	1			0				1		0
929	<35	ICSI	7	6	1	E,E,A,E,E,E,E	0	0	0		1		0				1			0				1		1	0	1	0
930	35-37	ICSI	3	3	0	E,E,E	0	0	0		1		0				1			0
931	<35	ICSI	8	7	1	E,E,E,E,E,E,A,E	1	0	1	0
932	35-37	IVF	10	6	4	A,E,E,E,E,E,E,A,A,A	1	1	0		1		0				1			1	0	1	0
933	<35	IVF	7	4	3	A,E,A,A,E,E,E	1	0	1	0
934	<35	ICSI	5	5	0	E,E,E,E,E	1	0	1	0
935	<35	ICSI	4	3	1	A,E,E,E	0				1		1	0	1	0
936	<35	IVF	14	9	5	E,A,E,A,E,A,E,E,A,E,A,A,A,E	1	0	1	0
937	<35	IVF	7	6	1	E,E,E,E,E,E,A	1	0	1	0
938	38-39	ICSI	2	0	2	A,A	0				1		0
939	35-37	ICSI	2	2	0	E,E	1	0	1	0
940	<35	IVF	7	4	3	A,E,A,E,A,A,E	0				1		1	0	1	0
941	<35	ICSI	4	2	2	A,A,E,E	0				1		0				1			0				1		0
942	<35	IVF	8	6	2	A,A,E,E,E,E,E,E	1	0	1	0
943	35-37	ICSI	0	0	0
944	<35	IVF	7	6	1	E,E,A,E,E,E,E	0	0	0		0	1	0				1			0				1		0				1		1	0	1	0
945	<35	IVF	2	2	0	E,E	1	0	1	0
946	35-37	ICSI	0	0	0
947	38-39	IVF	0	0	0
948	<35	ICSI	8	3	5	A,A,E,E,A,A,E,A	1	0	1	0
949	<35	ICSI	2	1	1	A,E	0				1		1	1	0
950	35-37	ICSI	0	0	0
951	<35	IVF	0	0	0
952	<35	IVF	2	2	0	E,E	0	0	0		1		0
953	35-37	ICSI	6	5	1	E,E,E,E,E,A	0	0	0		1		0				1			1	0	1	0
954	35-37	IVF	4	2	2	E,A,A,E	0	0	0		1		0				1			1	0	1	0
955	35-37	ICSI	5	3	2	A,E,A,E,E	1	0	1	0
956	<35	ICSI	5	4	1	E,A,E,E,E	0	0	0		1		0				0	1		1	0	1	0
957	38-39	ICSI	2	2	0	E,E	0	0	0		1		1	0	1	0
958	35-37	ICSI	4	1	3	E,A,A,A	0	0	0		1		1	0	1	0
959	<35	IVF	4	2	2	E,A,E,A	1	0	1	0
960	<35	ICSI	9	7	2	A,E,E,E,E,A,E,E,E	0				1		1	0	1	0
961	<35	ICSI	3	2	1	A,E,E	0				1		0				1			0
962	35-37	ICSI	6	5	1	E,E,E,A,E,E	0	0	0		1		0				1			1	0	1	0
963	<35	IVF	4	3	1	E,A,E,E	0	0	0		1		0				1			0				1		0
964	38-39	ICSI	0	0	0
965	<35	ICSI	11	9	2	E,E,A,A,E,E,E,E,E,E,E	0	0	0		1		0				1			1	0	1	0
966	38-39	ICSI	2	1	1	E,A	0	0	0		1		0
967	35-37	ICSI	4	2	2	E,A,E,A	1	0	1	0
968	<35	ICSI	4	3	1	E,A,E,E	0	0	0		1		1	0	1	0
969	<35	ICSI	1	0	1	A	0
970	38-39	ICSI	5	4	1	E,A,E,E,E	0	0	0		1		1	0	1	0
971	35-37	ICSI	0	0	0
972	<35	IVF	0	0	0
973	<35	IVF	0	0	0
974	38-39	ICSI	4	2	2	A,E,A,E	1	0	1	0
975	<35	ICSI	4	3	1	E,A,E,E	0	0	0		1		1	0	1	0
976	<35	IVF	2	1	1	E,A	0	0	0		1		1	1	0
977	35-37	ICSI	4	2	2	E,A,E,A	1	0	1	0
978	38-39	ICSI	3	1	2	E,A,A	1	0	1	0
979	35-37	ICSI	6	2	4	A,E,A,A,E,A	0				1		0				1			0				1		0				1		0				1		0
980	<35	ICSI	2	2	0	E,E	0	0	0		1		0
981	<35	ICSI	4	2	2	A,A,E,E	0				1		0				1			0				1		0
982	<35	ICSI	3	3	0	E,E,E	0	0	0		1		1	0	1	0
983	<35	IVF	4	3	1	A,E,E,E	0				1		1	0	1	0
984	35-37	ICSI	3	2	1	E,A,E	0	0	0		1		1	0	1	0
985	<35	ICSI	5	3	2	E,A,E,E,A	1	0	1	0
986	<35	ICSI	0	0	0
987	35-37	ICSI	4	3	1	E,A,E,E	1	0	1	0
988	<35	ICSI	2	2	0	E,E	0	0	0		1		0
989	<35	ICSI	6	3	3	E,E,A,A,A,E	0	0	0		1		0				1			0				1		0				1		0				1		0
990	35-37	IVF	3	2	1	E,A,E	0	0	0		1		1	0	1	0
991	<35	IVF	2	2	0	E,E	0	0	0		1		0
992	<35	IVF	5	4	1	E,E,E,A,E	1	0	1	0
993	35-37	IVF	3	3	0	E,E,E	0	0	0		1		0				0
994	35-37	ICSI	0	0	0
995	<35	ICSI	5	3	2	A,A,E,E,E	0				1		0				1			0				1		1	0	1	0
996	35-37	IVF	8	3	5	A,A,E,E,E,A,A,A	0				1		0				1			0				1		0				1		0				1		0				1	0				1	0
997	35-37	ICSI	2	1	1	A,E	0				1		0
998	<35	ICSI	9	7	2	A,E,E,E,E,E,E,A,E	0				0	1	1	0	1	0
999	38-39	ICSI	1	1	0	E	1	0	1	0
1000	<35	ICSI	6	5	1	E,E,E,E,A,E	1	0	1	0
[truncated: 35 more columns]

## Sheet: 4 PGS3
							652
							Attempt 1	0	652		0		Attempt 2	0	0		0			Attempt 3	0	0		0		Attempt 4	0	0		0		Attempt 5	0	0		0		Attempt 6	0	0		0	Attempt 7	0	0		0	Attempt 8	0
ID	Age	Insemination	Embryos (n)	Euploid (n)	Aneuploid (n)	Transfer order	Pregnant	Miscarriage	Live birth	Multiple	Thaw1	Thaw1a	Pregnant	Miscarriage	Live birth	Multiple	Thaw2	Thaw2b	Thaw2c	Pregnant	Miscarriage	Live birth	Multiple	Thaw3	Thaw3b	Pregnant	Miscarriage	Live birth	Multiple	Thaw4	Thaw4b	Pregnant	Miscarriage	Live birth	Multiple	Thaw5	Thaw5b	Pregnant	Miscarriage	Live birth	Multiple	Thaw6	Pregnant	Miscarriage	Live birth	Multiple	Thaw7	Pregnant	Miscarriage
1	<35	ICSI	0	0	0
2	<35	ICSI	7	5	2	E,E,A,A,E,E,E	1	0	1	0
3	<35	ICSI	6	3	3	A,E,E,A,E,A
4	<35	IVF	4	3	1	E,E,E,A	1	0	1	0
5	<35	ICSI	2	1	1	A,E
6	35-37	IVF	2	1	1	E,A
7	<35	ICSI	0	0	0
8	<35	ICSI	4	2	2	E,A,E,A	1	0	1	0
9	<35	IVF	12	6	6	E,E,A,E,A,A,E,A,E,A,E,A	1	0	1	0
10	35-37	ICSI	0	0	0
11	38-39	ICSI	4	3	1	E,E,E,A	1	0	1	0
12	38-39	ICSI	0	0	0
13	<35	IVF	2	2	0	E,E	1	0	1	0
14	<35	IVF	1	0	1	A
15	<35	ICSI	5	4	1	E,E,A,E,E	1	0	1	0
16	<35	ICSI	7	3	4	E,A,E,E,A,A,A	1	0	1	0
17	<35	IVF	4	3	1	E,E,E,A	1	0	1	0
18	38-39	ICSI	5	1	4	E,A,A,A,A
19	35-37	ICSI	1	0	1	A	1	0	1	0
20	<35	ICSI	2	2	0	E,E	1	0	1	0
21	<35	ICSI	4	4	0	E,E,E,E	1	0	1	0
22	<35	ICSI	5	2	3	E,A,A,E,A	1	0	1	0
23	<35	IVF	4	3	1	E,E,E,A
24	38-39	Aban	0	0	0
25	<35	IVF	8	5	3	A,E,E,E,A,E,E,A	1	0	1	0
26	<35	IVF	0	0	0
27	<35	ICSI	0	0	0
28	<35	ICSI	5	3	2	A,A,E,E,E
29	35-37	Aban	0	0	0
30	35-37	IVF	4	2	2	A,E,E,A	1	0	1	0
31	<35	ICSI	7	7	0	E,E,E,E,E,E,E	1	0	1	0
32	<35	IVF	1	1	0	E
33	<35	IVF	12	8	4	E,E,E,A,A,A,E,E,E,E,E,A	1	0	1	0
34	<35	ICSI	12	3	9	A,A,A,E,A,A,A,E,A,E,A,A	1	0	1	0
35	<35	ICSI	2	1	1	E,A	1	0	1	0
36	38-39	Aban	0	0	0
37	<35	ICSI	3	2	1	A,E,E	1	0	1	0
38	<35	ICSI	7	4	3	E,A,A,E,E,E,A	1	0	1	0
39	<35	ICSI	6	4	2	E,A,E,E,A,E	1	0	1	0
40	<35	ICSI	5	5	0	E,E,E,E,E	1	0	1	0
41	38-39	ICSI	2	1	1	E,A	1	0	1	0
42	<35	IVF	5	5	0	E,E,E,E,E	1	0	1	0
43	38-39	ICSI	2	1	1	A,E	1	0	1	0
44	<35	IVF	2	2	0	E,E
45	35-37	IVF	5	3	2	A,A,E,E,E	1	0	1	0
46	35-37	ICSI	3	3	0	E,E,E
47	<35	ICSI	3	2	1	E,E,A	1	0	1	0
48	<35	IVF	0	0	0
49	<35	ICSI	6	4	2	E,E,A,A,E,E	1	0	1	0
50	<35	IVF	6	6	0	E,E,E,E,E,E	1	0	1	0
51	<35	ICSI	9	9	0	E,E,E,E,E,E,E,E,E	1	0	1	0
52	<35	ICSI	11	8	3	E,E,A,E,E,A,E,A,E,E,E	1	0	1	0
53	<35	ICSI	8	3	5	E,A,A,A,E,A,A,E	1	0	1	0
54	<35	ICSI	6	4	2	A,E,E,E,E,A	1	0	1	0
55	<35	ICSI	5	4	1	E,E,E,A,E	1	0	1	0
56	<35	ICSI	4	4	0	E,E,E,E	1	0	1	0
57	<35	ICSI	9	5	4	E,A,A,E,E,E,A,E,A	1	0	1	0
58	35-37	ICSI	0	0	0
59	<35	IVF	5	4	1	E,E,E,A,E
60	<35	IVF	7	5	2	E,A,E,A,E,E,E
61	<35	ICSI	4	4	0	E,E,E,E	1	0	1	0
62	<35	ICSI	7	5	2	A,E,E,A,E,E,E	1	0	1	0
63	38-39	ICSI	2	2	0	E,E
64	38-39	IVF	1	0	1	A
65	35-37	IVF	7	4	3	E,A,A,E,A,A,E	1	0	1	0
66	<35	ICSI	3	3	0	E,E,E	1	0	1	0
67	<35	ICSI	4	4	0	E,E,E,E	1	0	1	0
68	<35	ICSI	8	6	2	E,E,A,E,E,E,E,A	1	0	1	0
69	<35	ICSI	6	3	3	E,E,A,E,A,A	1	0	1	0
70	<35	ICSI	6	5	1	E,E,E,A,E,E	1	0	1	0
71	38-39	IVF	3	3	0	E,E,E
72	<35	ICSI	5	3	2	A,A,E,E,E	1	0	1	0
73	<35	IVF	9	8	1	E,A,E,E,E,E,E,E,E	1	0	1	0
74	38-39	ICSI	1	1	0	E
75	<35	ICSI	9	5	4	E,A,A,E,E,A,E,E,A	1	0	1	0
76	<35	IVF	3	2	1	E,E,A
77	38-39	IVF	4	3	1	E,A,E,E	1	0	1	0
78	35-37	IVF	6	5	1	E,E,E,E,E,A	1	0	1	0
79	35-37	ICSI	3	1	2	E,A,A	1	0	1	0
80	35-37	ICSI	5	5	0	E,E,E,E,E	1	0	1	0
81	<35	IVF	0	0	0
82	<35	ICSI	7	5	2	E,A,E,A,E,E,E	1	0	1	0
83	<35	IVF	6	6	0	E,E,E,E,E,E	1	0	1	0
84	38-39	ICSI	4	1	3	E,A,A,A	1	0	1	0
85	<35	ICSI	5	4	1	E,E,A,E,E	1	0	1	0
86	<35	ICSI	7	2	5	A,A,E,A,A,A,E
87	<35	IVF	7	5	2	E,A,E,E,E,E,A	1	0	1	0
88	35-37	ICSI	1	1	0	E
89	35-37	ICSI	10	7	3	A,E,E,E,E,E,E,E,A,A	1	0	1	0
90	35-37	ICSI	4	3	1	A,E,E,E	1	0	1	0
91	<35	ICSI	8	6	2	E,E,E,E,E,A,E,A	1	0	1	0
92	<35	IVF	4	3	1	A,E,E,E
93	35-37	IVF	4	4	0	E,E,E,E	1	0	1	0
94	<35	IVF	9	4	5	A,A,A,E,A,E,E,E,A	1	0	1	0
95	35-37	ICSI	3	2	1	A,E,E
96	35-37	IVF	0	0	0
97	35-37	IVF	4	3	1	E,E,E,A	1	0	1	0
98	<35	IVF	8	6	2	E,E,E,E,E,E,A,A	1	0	1	0
99	38-39	ICSI	5	2	3	E,A,A,E,A
100	35-37	ICSI	4	2	2	A,E,E,A
101	35-37	ICSI	4	2	2	E,E,A,A	1	0	1	0
102	<35	ICSI	5	4	1	E,A,E,E,E	1	0	1	0
103	35-37	IVF	2	1	1	A,E	1	0	1	0
104	<35	ICSI	5	4	1	E,E,E,E,A	1	0	1	0
105	35-37	IVF	2	1	1	A,E	1	0	1	0
106	35-37	IVF	2	1	1	A,E	1	0	1	0
107	<35	ICSI	6	2	4	A,E,A,A,E,A	1	0	1	0
108	<35	ICSI	4	3	1	E,E,A,E	1	0	1	0
109	35-37	ICSI	2	0	2	A,A
110	35-37	ICSI	5	4	1	E,A,E,E,E	1	0	1	0
111	<35	IVF	6	5	1	E,E,E,E,A,E	1	0	1	0
112	38-39	IVF	4	1	3	E,A,A,A	1	0	1	0
113	<35	ICSI	1	1	0	E	1	0	1	0
114	<35	ICSI	5	4	1	E,E,A,E,E	1	0	1	0
115	<35	Aban	0	0	0
116	35-37	ICSI	3	2	1	A,E,E
117	<35	ICSI	4	3	1	E,E,E,A	1	0	1	0
118	<35	ICSI	3	2	1	E,A,E	1	0	1	0
119	35-37	ICSI	2	1	1	A,E	1	0	1	0
120	<35	ICSI	8	5	3	E,A,E,A,A,E,E,E	1	0	1	0
121	35-37	ICSI	4	3	1	E,E,A,E	1	0	1	0
122	<35	IVF	9	7	2	E,A,E,E,E,E,A,E,E	1	0	1	1
123	<35	ICSI	5	2	3	E,A,E,A,A	1	0	1	0
124	<35	IVF	5	3	2	E,E,E,A,A	1	0	1	0
125	<35	ICSI	5	4	1	E,A,E,E,E	1	0	1	0
126	<35	ICSI	9	7	2	E,E,E,E,E,A,E,E,A	1	0	1	0
127	35-37	ICSI	2	2	0	E,E
128	<35	IVF	5	4	1	E,E,E,A,E	1	0	1	0
129	35-37	ICSI	2	2	0	E,E	1	0	1	0
130	<35	ICSI	3	2	1	A,E,E	1	0	1	0
131	<35	ICSI	4	3	1	E,E,E,A	1	0	1	0
132	38-39	IVF	2	0	2	A,A
133	38-39	ICSI	0	0	0
134	<35	IVF	7	5	2	E,E,E,A,E,A,E	1	0	1	0
135	35-37	ICSI	3	2	1	E,E,A	1	0	1	0
136	35-37	IVF	3	2	1	E,A,E	1	0	1	0
137	<35	ICSI	4	2	2	A,E,E,A	1	0	1	0
138	<35	ICSI	8	6	2	E,A,A,E,E,E,E,E	1	0	1	0
139	<35	IVF	0	0	0
140	<35	ICSI	5	4	1	E,E,E,A,E	1	0	1	0
141	35-37	IVF	14	10	4	A,A,E,E,A,E,A,E,E,E,E,E,E,E	1	0	1	0
142	<35	ICSI	6	4	2	E,A,E,A,E,E	1	0	1	0
143	35-37	IVF	8	4	4	A,A,E,A,E,A,E,E	1	0	1	0
144	35-37	ICSI	0	0	0
145	<35	ICSI	0	0	0
146	35-37	IVF	10	7	3	E,E,A,A,E,E,E,E,E,A	1	0	1	0
147	35-37	ICSI	2	2	0	E,E
148	<35	IVF	3	2	1	E,E,A	1	0	1	0
149	<35	ICSI	4	3	1	E,E,A,E
150	38-39	ICSI	4	3	1	A,E,E,E
151	<35	IVF	3	2	1	A,E,E
152	38-39	IVF	5	3	2	E,E,A,E,A	1	0	1	0
153	<35	ICSI	0	0	0
154	<35	ICSI	3	2	1	E,E,A	1	0	1	0
155	35-37	ICSI	2	1	1	A,E	1	0	1	0
156	35-37	IVF	4	2	2	A,E,E,A	1	0	1	0
157	<35	IVF	5	5	0	E,E,E,E,E	1	0	1	0
158	38-39	ICSI	4	3	1	E,E,A,E
159	<35	IVF	4	3	1	A,E,E,E	1	0	1	0
160	35-37	ICSI	3	2	1	E,A,E
161	<35	ICSI	7	5	2	E,E,A,E,E,A,E	1	0	1	0
162	38-39	ICSI	7	3	4	E,A,A,E,A,A,E
163	<35	IVF	6	5	1	E,E,E,E,E,A
164	<35	ICSI	2	2	0	E,E
165	<35	ICSI	6	3	3	E,A,E,E,A,A
166	<35	ICSI	0	0	0
167	<35	IVF	4	3	1	E,E,A,E	1	0	1	0
168	35-37	IVF	4	3	1	E,E,A,E
169	<35	ICSI	4	2	2	A,A,E,E
170	38-39	ICSI	5	0	5	A,A,A,A,A
171	<35	ICSI	9	4	5	A,A,E,A,A,E,E,A,E	1	0	1	0
172	<35	ICSI	5	3	2	A,E,E,A,E	1	0	1	0
173	38-39	ICSI	0	0	0
174	<35	ICSI	3	1	2	A,E,A
175	<35	ICSI	0	0	0
176	35-37	IVF	3	2	1	E,E,A	1	0	1	0
177	<35	IVF	4	4	0	E,E,E,E	1	0	1	0
178	35-37	IVF	4	2	2	E,E,A,A	1	0	1	0
179	35-37	IVF	2	2	0	E,E	1	0	1	0
180	38-39	ICSI	7	4	3	E,E,A,A,A,E,E	1	0	1	0
181	<35	IVF	2	2	0	E,E	1	0	1	0
182	<35	ICSI	5	4	1	A,E,E,E,E	1	0	1	0
183	<35	IVF	5	3	2	A,A,E,E,E	1	0	1	0
184	35-37	ICSI	0	0	0
185	35-37	ICSI	3	2	1	E,E,A	1	0	1	0
186	<35	IVF	7	6	1	E,E,E,E,E,A,E	1	0	1	0
187	<35	ICSI	2	2	0	E,E
188	<35	IVF	4	2	2	E,A,E,A	1	0	1	0
189	<35	IVF	1	0	1	A
190	38-39	ICSI	0	0	0
191	35-37	ICSI	5	3	2	A,E,E,E,A	1	0	1	0
192	35-37	ICSI	5	4	1	E,E,A,E,A	1	0	1	0
193	38-39	IVF	2	1	1	A,E
194	<35	ICSI	9	7	2	A,E,E,E,E,E,A,E,E	1	0	1	0
195	<35	IVF	8	4	4	E,A,E,A,A,A,E,A	1	0	1	0
196	<35	IVF	0	0	0
197	<35	IVF	10	9	1	A,E,E,E,E,E,E,E,E,E	1	0	1	0
198	<35	IVF	8	7	1	E,E,E,A,E,E,E,E	1	0	1	0
199	<35	ICSI	11	5	6	A,E,A,A,E,E,A,E,A,E,A	1	0	1	0
200	35-37	ICSI	3	3	0	E,E,E	1	0	1	0
201	<35	ICSI	2	1	1	A,E
202	<35	ICSI	10	7	3	A,E,E,E,A,A,E,E,E,E	1	0	1	0
203	<35	ICSI	7	6	1	E,E,E,A,E,E,E	1	0	1	0
204	<35	ICSI	14	7	7	A,E,A,E,A,A,A,A,E,E,E,E,E,A	1	0	1	0
205	<35	ICSI	0	0	0
206	<35	ICSI	11	5	6	A,A,E,E,E,A,A,E,A,A,E	1	0	1	0
207	<35	ICSI	5	1	4	A,A,A,E,A	1	0	1	0
208	<35	IVF	7	6	1	E,E,E,E,E,A,E	1	0	1	0
209	35-37	IVF	4	2	2	E,A,A,E	1	0	1	0
210	35-37	ICSI	3	1	2	E,A,A
211	<35	IVF	5	4	1	A,E,E,E,E
212	35-37	IVF	8	5	3	A,E,E,E,E,E,A,A	1	0	1	0
213	<35	ICSI	0	0	0
214	<35	IVF	5	4	1	E,E,E,E,A	1	0	1	0
215	<35	IVF	9	5	4	A,E,E,A,A,E,E,A,E	1	0	1	1
216	<35	ICSI	12	9	3	E,E,A,E,E,A,E,E,E,E,A,E	1	0	1	0
217	35-37	ICSI	7	5	2	E,E,A,E,E,E,A	1	0	1	0
218	<35	ICSI	10	9	1	E,E,E,E,A,E,E,E,E,E	1	0	1	1
219	<35	IVF	11	5	6	A,A,E,E,E,E,A,E,A,A,A	1	0	1	0
220	35-37	IVF	11	8	3	A,A,E,E,A,E,E,E,E,E,E	1	0	1	0
221	38-39	ICSI	3	1	2	A,E,A	1	0	1	0
222	38-39	ICSI	1	0	1	A
223	<35	ICSI	5	4	1	E,E,E,A,E	1	0	1	0
224	<35	ICSI	0	0	0
225	35-37	ICSI	8	2	6	E,A,A,E,A,A,A,A	1	0	1	0
226	38-39	ICSI	4	3	1	A,E,E,E	1	0	1	0
227	35-37	ICSI	3	2	1	E,E,A	1	0	1	0
228	<35	ICSI	5	3	2	A,A,E,E,E
229	<35	ICSI	7	5	2	A,E,E,E,A,E,E	1	0	1	0
230	38-39	IVF	6	3	3	A,A,E,E,E,A	1	0	1	0
231	<35	ICSI	8	6	2	E,E,A,E,A,E,E,E	1	0	1	0
232	<35	ICSI	10	7	3	E,A,E,A,A,E,E,E,E,E	1	0	1	0
233	<35	IVF	9	7	2	A,E,A,E,E,E,E,E,E	1	0	1	0
234	<35	ICSI	2	2	0	E,E
235	<35	IVF	5	5	0	E,E,E,E,E	1	0	1	0
236	<35	ICSI	5	3	2	E,E,E,A,A	1	0	1	0
237	<35	IVF	5	3	2	E,A,E,E,A	1	0	1	0
238	<35	ICSI	5	4	1	E,A,E,E,E	1	0	1	0
239	35-37	IVF	5	3	2	A,E,A,E,E	1	0	1	0
240	35-37	IVF	2	2	0	E,E
241	<35	ICSI	7	6	1	E,E,E,E,A,E,E	1	0	1	0
242	38-39	IVF	6	4	2	A,E,E,A,E,E	1	0	1	0
243	<35	IVF	5	5	0	E,E,E,E,E	1	0	1	0
244	<35	ICSI	4	3	1	A,E,E,E
245	<35	IVF	0	0	0
246	<35	IVF	2	2	0	E,E
247	35-37	ICSI	6	3	3	E,A,A,A,E,E	1	0	1	0
248	<35	IVF	6	4	2	A,E,E,E,E,A	1	0	1	0
249	<35	ICSI	4	3	1	E,A,E,E	1	0	1	0
250	35-37	ICSI	2	2	0	E,E	1	0	1	0
251	38-39	IVF	3	1	2	A,A,E
252	38-39	ICSI	0	0	0
253	35-37	ICSI	2	2	0	E,E	1	0	1	0
254	<35	ICSI	2	2	0	E,E	1	0	1	0
255	<35	ICSI	5	4	1	E,E,A,E,E
256	<35	ICSI	4	1	3	A,A,E,A	1	0	1	0
257	<35	ICSI	4	3	1	E,A,E,E
258	35-37	IVF	4	3	1	A,E,E,E	1	0	1	0
259	<35	IVF	4	4	0	E,E,E,E	1	0	1	0
260	<35	ICSI	0	0	0
261	38-39	IVF	5	3	2	E,A,E,A,E	1	0	1	0
262	<35	ICSI	6	6	0	E,E,E,E,E,E	1	0	1	0
263	<35	IVF	3	2	1	A,E,E
264	<35	IVF	11	8	3	E,E,A,E,A,E,E,E,E,A,E	1	0	1	0
265	<35	ICSI	4	4	0	E,E,E,E	1	0	1	0
266	35-37	ICSI	1	1	0	E
267	<35	IVF	11	6	5	E,E,A,A,E,A,E,E,A,A,E	1	0	1	0
268	<35	ICSI	5	3	2	A,E,E,E,A	1	0	1	0
269	<35	ICSI	4	2	2	E,E,A,A	1	0	1	1
270	38-39	ICSI	7	3	4	A,E,E,E,A,A,A	1	0	1	0
271	35-37	IVF	4	4	0	E,E,E,E	1	0	1	0
272	<35	ICSI	4	1	3	A,E,A,A	1	0	1	0
273	<35	ICSI	0	0	0
274	<35	ICSI	0	0	0
275	<35	IVF	7	6	1	A,E,E,E,E,E,E	1	0	1	0
276	<35	ICSI	9	7	2	E,A,E,E,E,E,A,E,E	1	0	1	0
277	35-37	ICSI	6	3	3	E,E,E,A,A,A	1	0	1	0
278	35-37	IVF	3	1	2	A,E,A	1	0	1	0
279	<35	ICSI	4	3	1	E,E,E,A	1	0	1	0
280	<35	Aban	0	0	0
281	<35	ICSI	7	6	1	A,E,E,E,E,E,E	1	0	1	0
282	<35	ICSI	7	5	2	E,E,E,A,A,E,E	1	0	1	0
283	<35	ICSI	9	3	6	E,A,A,A,A,E,E,A,A	1	0	1	0
284	<35	ICSI	8	8	0	E,E,E,E,E,E,E,E	1	0	1	0
285	<35	ICSI	2	1	1	A,E	1	0	1	0
286	38-39	ICSI	1	0	1	A
287	<35	IVF	9	7	2	E,A,E,E,E,E,E,A,E	1	0	1	0
288	38-39	ICSI	12	2	10	A,A,A,A,A,A,E,E,A,A,A,A	1	0	1	0
289	<35	ICSI	8	3	5	A,A,E,A,E,A,A,E	1	0	1	0
290	35-37	ICSI	2	1	1	A,E
291	38-39	ICSI	1	1	0	E	1	0	1	0
292	<35	ICSI	5	3	2	E,A,E,A,E
293	35-37	ICSI	7	6	1	A,E,E,E,E,E,E
294	35-37	IVF	3	1	2	A,A,E
295	35-37	IVF	4	3	1	E,E,A,E
296	35-37	ICSI	0	0	0
297	<35	ICSI	8	6	2	E,E,E,A,E,E,A,E	1	0	1	0
298	<35	ICSI	4	2	2	E,E,A,A
299	<35	IVF	5	5	0	E,E,E,E,E	1	0	1	0
300	38-39	ICSI	4	2	2	E,A,E,A	1	0	1	0
301	35-37	ICSI	10	8	2	E,E,E,E,E,A,E,A,E,E	1	0	1	0
302	<35	Aban	0	0	0
303	<35	IVF	0	0	0
304	<35	ICSI	5	4	1	E,E,E,A,E	1	0	1	0
305	35-37	ICSI	3	3	0	E,E,E	1	0	1	0
306	<35	ICSI	4	3	1	A,E,E,E	1	0	1	0
307	<35	ICSI	2	1	1	A,E	1	0	1	0
308	<35	ICSI	3	2	1	E,A,E	1	0	1	0
309	35-37	ICSI	5	1	4	A,A,A,E,A
310	38-39	ICSI	4	3	1	E,E,E,A
311	<35	IVF	3	1	2	A,A,E	1	0	1	0
312	<35	ICSI	0	0	0
313	<35	ICSI	3	3	0	E,E,E	1	0	1	0
314	35-37	ICSI	2	1	1	E,A
315	<35	ICSI	4	4	0	E,E,E,E
316	35-37	ICSI	8	5	3	E,E,A,A,E,A,E,E	1	0	1	0
317	<35	ICSI	7	7	0	E,E,E,E,E,E,E	1	0	1	0
318	<35	IVF	9	7	2	E,E,A,E,A,E,E,E,E	1	0	1	0
319	<35	ICSI	9	7	2	E,E,E,E,E,A,A,E,E	1	0	1	0
320	<35	ICSI	11	7	4	E,E,E,A,A,E,A,E,E,A,E	1	0	1	0
321	<35	ICSI	11	7	4	E,E,E,A,E,E,A,A,A,E,E	1	0	1	0
322	<35	Aban	0	0	0
323	<35	ICSI	3	2	1	E,E,A	1	0	1	0
324	<35	IVF	5	4	1	E,E,E,A,E
325	<35	IVF	2	2	0	E,E	1	0	1	0
326	<35	IVF	3	1	2	E,A,A
327	<35	ICSI	4	2	2	A,E,E,A
328	38-39	Aban	0	0	0
329	<35	ICSI	7	4	3	A,E,A,E,A,E,E	1	0	1	0
330	<35	IVF	0	0	0
331	35-37	ICSI	3	2	1	A,E,E
332	35-37	ICSI	6	4	2	E,E,A,E,E,A	1	0	1	0
333	<35	IVF	8	7	1	E,E,E,E,E,A,E,E	1	0	1	0
334	<35	ICSI	2	1	1	E,A	1	0	1	0
335	<35	IVF	4	3	1	E,E,A,E
336	<35	ICSI	9	5	4	A,E,E,A,A,E,E,A,E	1	0	1	0
337	<35	ICSI	4	1	3	A,E,A,A
338	<35	ICSI	5	4	1	E,E,E,A,E	1	0	1	0
339	<35	ICSI	11	8	3	E,E,A,E,E,A,A,E,E,E,E	1	0	1	0
340	<35	ICSI	6	1	5	E,A,A,A,A,A	1	0	1	0
341	38-39	IVF	2	0	2	A,A
342	<35	ICSI	0	0	0
343	<35	IVF	0	0	0
344	35-37	ICSI	5	3	2	A,E,E,E,A	1	0	1	0
345	<35	ICSI	9	4	5	E,E,E,A,A,A,E,A,A	1	0	1	0
346	38-39	IVF	7	5	2	E,E,E,E,A,A,E	1	0	1	0
347	<35	ICSI	9	6	3	E,E,A,E,A,A,E,E,A	1	0	1	0
348	<35	ICSI	5	4	1	E,E,E,A,E	1	0	1	0
349	35-37	ICSI	0	0	0
350	<35	ICSI	0	0	0
351	<35	Aban	0	0	0
352	35-37	ICSI	2	2	0	E,E	1	0	1	0
353	<35	ICSI	0	0	0
354	38-39	ICSI	1	1	0	E
355	35-37	IVF	0	0	0
356	<35	ICSI	4	3	1	A,E,E,E	1	0	1	0
357	38-39	IVF	8	7	1	E,E,E,E,E,E,E,A	1	0	1	0
358	35-37	IVF	4	1	3	A,A,A,E
359	35-37	IVF	0	0	0
360	<35	ICSI	4	2	2	A,A,E,E	1	0	1	0
361	<35	ICSI	4	2	2	E,A,E,A
362	<35	ICSI	4	4	0	E,E,E,E	1	0	1	0
363	<35	IVF	4	3	1	E,A,E,E
364	<35	ICSI	7	6	1	E,E,E,A,E,E,E	1	0	1	0
365	35-37	IVF	0	0	0
366	<35	ICSI	0	0	0
367	38-39	ICSI	7	4	3	E,E,A,A,A,E,E	1	0	1	0
368	<35	IVF	6	5	1	A,E,E,E,E,E	1	0	1	0
369	<35	ICSI	2	1	1	A,E
370	<35	ICSI	6	3	3	A,E,A,A,E,E	1	0	1	0
371	<35	IVF	5	3	2	E,E,A,A,E	1	0	1	0
372	<35	ICSI	3	1	2	E,A,A
373	38-39	ICSI	7	3	4	A,A,A,A,E,E,E
374	<35	ICSI	5	5	0	E,E,E,E,E	1	0	1	0
375	35-37	ICSI	2	1	1	A,E
376	<35	IVF	3	3	0	E,E,E	1	0	1	0
377	<35	IVF	1	0	1	A
378	<35	IVF	2	1	1	E,A	1	0	1	0
379	<35	ICSI	3	1	2	A,A,E	1	0	1	0
380	38-39	IVF	2	0	2	A,A
381	<35	ICSI	7	3	4	E,E,A,A,E,A,A	1	0	1	0
382	<35	IVF	4	4	0	E,E,E,E	1	0	1	0
383	35-37	IVF	1	1	0	E
384	35-37	IVF	4	2	2	A,E,E,A	1	0	1	0
385	<35	ICSI	6	5	1	E,E,E,A,E,E	1	0	1	0
386	<35	IVF	0	0	0
387	<35	IVF	4	2	2	E,E,A,A
388	<35	ICSI	0	0	0
389	35-37	ICSI	14	10	4	E,E,E,E,E,A,A,A,E,E,E,E,A,E	1	0	1	0
390	<35	ICSI	3	2	1	E,A,E	1	0	1	0
391	<35	ICSI	5	3	2	E,A,A,E,E	1	0	1	0
392	<35	ICSI	9	5	4	E,E,A,E,A,A,E,A,E	1	0	1	0
393	<35	ICSI	3	2	1	A,E,E	1	0	1	0
394	<35	ICSI	5	5	0	E,E,E,E,E	1	0	1	1
395	<35	ICSI	9	7	2	E,E,E,E,E,A,A,E,E	1	0	1	0
396	<35	ICSI	5	5	0	E,E,E,E,E	1	0	1	0
397	<35	IVF	7	5	2	A,A,E,E,E,E,E	1	0	1	0
398	<35	ICSI	5	3	2	E,E,A,E,A	1	0	1	0
399	<35	ICSI	8	5	3	A,A,E,E,A,E,E,E	1	0	1	0
400	35-37	IVF	4	1	3	E,A,A,A	1	0	1	0
401	35-37	ICSI	5	4	1	E,E,E,A,E
402	<35	ICSI	4	4	0	E,E,E,E	1	0	1	0
403	<35	IVF	6	4	2	E,A,A,E,E,E	1	0	1	0
404	<35	ICSI	0	0	0
405	<35	ICSI	13	11	2	E,E,E,E,E,E,E,E,A,E,A,E,E	1	0	1	0
406	<35	ICSI	5	1	4	A,E,A,A,A
407	<35	IVF	3	3	0	E,E,E
408	35-37	ICSI	7	3	4	E,E,A,E,A,A,A	1	0	1	0
409	35-37	IVF	9	4	5	E,A,A,A,E,A,E,A,E	1	0	1	0
410	<35	IVF	2	1	1	A,E
411	<35	ICSI	4	3	1	E,E,A,E	1	0	1	0
412	35-37	ICSI	2	2	0	E,E
413	<35	ICSI	4	3	1	A,E,E,E	1	0	1	0
414	<35	ICSI	4	4	0	E,E,E,E	1	0	1	0
415	<35	ICSI	4	2	2	E,A,E,A	1	0	1	0
416	38-39	ICSI	0	0	0
417	35-37	ICSI	3	2	1	A,E,E
418	35-37	ICSI	5	2	3	A,E,A,A,E	1	0	1	0
419	<35	ICSI	5	3	2	E,A,E,A,E	1	0	1	0
420	<35	IVF	8	7	1	E,E,E,E,E,E,E,A	1	0	1	0
421	35-37	ICSI	4	2	2	A,A,E,E
422	<35	IVF	2	1	1	A,E
423	<35	IVF	8	6	2	A,E,E,E,A,E,E,E	1	0	1	0
424	<35	IVF	0	0	0
425	<35	IVF	2	1	1	A,E	1	0	1	0
426	35-37	IVF	14	8	6	E,A,A,E,A,E,A,A,E,E,E,E,E,A	1	0	1	0
427	<35	IVF	5	4	1	E,E,A,E,E	1	0	1	0
428	<35	ICSI	5	4	1	E,E,E,A,E
429	<35	ICSI	3	2	1	A,E,E	1	0	1	0
430	<35	ICSI	4	2	2	A,E,A,E	1	0	1	0
431	<35	ICSI	3	2	1	E,A,E	1	0	1	0
432	<35	ICSI	6	6	0	E,E,E,E,E,E	1	0	1	0
433	<35	ICSI	2	2	0	E,E
434	<35	ICSI	7	4	3	E,E,E,A,A,E,A	1	0	1	0
435	<35	ICSI	11	8	3	E,E,A,A,E,E,E,E,E,A,E	1	0	1	0
436	35-37	IVF	2	2	0	E,E
437	<35	IVF	3	2	1	A,E,E	1	0	1	0
438	<35	IVF	6	4	2	A,A,E,E,E,E	1	0	1	0
439	<35	ICSI	4	4	0	E,E,E,E	1	0	1	0
440	<35	IVF	2	2	0	E,E	1	0	1	0
441	<35	IVF	4	3	1	E,E,E,A	1	0	1	0
442	35-37	ICSI	5	4	1	E,E,A,E,E	1	0	1	0
443	<35	ICSI	0	0	0
444	38-39	ICSI	7	4	3	E,E,A,E,A,A,E	1	0	1	0
445	35-37	ICSI	5	3	2	A,E,E,A,E	1	0	1	0
446	<35	ICSI	9	6	3	E,E,E,A,E,A,A,E,E	1	0	1	0
447	38-39	ICSI	4	2	2	A,A,E,E	1	0	1	0
448	<35	ICSI	10	4	6	E,E,A,E,A,E,A,A,A,A	1	0	1	0
449	35-37	ICSI	5	3	2	E,E,A,E,A	1	0	1	0
450	35-37	ICSI	6	4	2	A,A,E,E,E,E	1	0	1	0
451	35-37	ICSI	0	0	0
452	35-37	ICSI	8	6	2	E,E,E,A,A,E,E,E	1	0	1	0
453	35-37	ICSI	5	2	3	E,A,A,E,A	1	0	1	0
454	35-37	ICSI	4	3	1	E,E,E,A	1	0	1	0
455	<35	IVF	4	2	2	A,A,E,E
456	<35	ICSI	4	3	1	E,E,E,A
457	<35	ICSI	6	5	1	E,E,A,E,E,E	1	0	1	0
458	<35	IVF	5	1	4	A,A,E,A,A	1	0	1	0
459	35-37	IVF	7	5	2	E,E,E,A,E,E,A	1	0	1	0
460	<35	ICSI	13	10	3	E,E,E,A,E,A,E,A,E,E,E,E	1	0	1	0
461	38-39	ICSI	2	0	2	A,A
462	<35	ICSI	2	1	1	A,E
463	35-37	ICSI	1	1	0	E	1	0	1	0
464	<35	ICSI	11	8	3	E,E,E,E,A,A,E,E,E,A,E	1	0	1	0
465	35-37	ICSI	0	0	0
466	35-37	ICSI	2	1	1	A,E	1	0	1	0
467	<35	ICSI	7	7	0	E,E,E,E,E,E,E	1	0	1	0
468	35-37	ICSI	3	3	0	E,E,E	1	0	1	0
469	<35	IVF	5	3	2	E,E,A,E,A	1	0	1	0
470	35-37	IVF	5	4	1	A,E,E,E,E	1	0	1	0
471	<35	ICSI	2	2	0	E,E
472	<35	ICSI	2	2	0	E,E	1	0	1	0
473	38-39	IVF	2	0	2	A,A
474	<35	ICSI	5	3	2	A,E,A,E,A	1	0	1	0
475	<35	ICSI	5	4	1	E,E,E,E,A	1	0	1	0
476	<35	IVF	5	5	0	E,E,E,E,E	1	0	1	0
477	<35	ICSI	7	6	1	E,E,E,A,E,E,E	1	0	1	0
478	35-37	ICSI	3	3	0	E,E,E	1	0	1	0
479	<35	Aban	0	0	0
480	<35	ICSI	4	4	0	E,E,E,E	1	0	1	0
481	<35	ICSI	7	7	0	E,E,E,E,E,E,E	1	0	1	0
482	<35	IVF	3	3	0	E,E,E
483	<35	IVF	4	2	2	E,A,E,A
484	<35	ICSI	6	6	0	E,E,E,E,E,E	1	0	1	0
485	<35	ICSI	2	2	0	E,E	1	0	1	0
486	<35	ICSI	6	3	3	E,A,A,E,E,A	1	0	1	0
487	<35	ICSI	0	0	0
488	<35	ICSI	2	2	0	E,E	1	0	1	0
489	35-37	ICSI	6	3	3	E,E,A,A,E,A	1	0	1	0
490	<35	ICSI	3	2	1	A,E,E	1	0	1	0
491	35-37	IVF	0	0	0
492	<35	ICSI	1	1	0	E
493	<35	ICSI	7	6	1	E,E,E,E,E,E,A	1	0	1	0
494	35-37	IVF	4	2	2	E,E,A,A	1	0	1	0
495	<35	ICSI	6	5	1	E,E,E,E,E,A	1	0	1	0
496	35-37	ICSI	6	3	3	E,A,E,A,A,E	1	0	1	0
497	38-39	ICSI	5	2	3	A,A,E,A,E	1	0	1	0
498	<35	IVF	5	3	2	E,A,E,E,A	1	0	1	0
499	<35	ICSI	6	4	2	E,E,A,A,E,E	1	0	1	0
500	35-37	ICSI	4	4	0	E,E,E,E	1	0	1	0
501	<35	IVF	4	3	1	E,E,E,A	1	0	1	0
502	<35	IVF	8	5	3	E,A,E,E,A,A,E,E	1	0	1	0
503	<35	ICSI	6	4	2	E,E,A,E,E,A	1	0	1	0
504	<35	ICSI	5	4	1	E,E,E,E,A
505	<35	ICSI	9	7	2	E,A,E,E,A,E,E,E,E	1	0	1	0
506	<35	ICSI	9	6	3	E,E,A,E,E,A,A,E,E	1	0	1	0
507	<35	ICSI	5	5	0	E,E,E,E,E	1	0	1	0
508	<35	IVF	7	7	0	E,E,E,E,E,E,E	1	0	1	0
509	35-37	ICSI	6	5	1	E,A,E,E,E,E	1	0	1	0
510	<35	ICSI	7	5	2	E,E,A,A,E,E,E	1	0	1	0
511	<35	IVF	5	5	0	E,E,E,E,E	1	0	1	0
512	<35	ICSI	0	0	0
513	35-37	ICSI	4	4	0	E,E,E,E	1	0	1	0
514	<35	ICSI	0	0	0
515	<35	ICSI	7	5	2	E,A,A,E,E,E,E	1	0	1	0
516	35-37	IVF	1	1	0	E
517	<35	ICSI	4	4	0	E,E,E,E	1	0	1	0
518	<35	IVF	3	3	0	E,E,E	1	0	1	0
519	<35	ICSI	4	4	0	E,E,E,E	1	0	1	0
520	<35	Aban	0	0	0
521	38-39	ICSI	4	3	1	E,E,A,E	1	0	1	0
522	<35	IVF	4	3	1	E,E,A,E	1	0	1	0
523	<35	IVF	2	1	1	A,E	1	0	1	0
524	35-37	IVF	1	1	0	E	1	0	1	0
525	<35	ICSI	4	3	1	A,E,E,E	1	0	1	0
526	38-39	IVF	1	0	1	A
527	<35	ICSI	0	0	0
528	<35	ICSI	4	3	1	E,E,E,A
529	<35	ICSI	4	3	1	E,E,A,E	1	0	1	0
530	<35	IVF	5	4	1	E,E,A,E,E	1	0	1	0
531	38-39	ICSI	2	0	2	A,A
532	35-37	ICSI	3	1	2	A,A,E
533	35-37	IVF	6	3	3	E,A,A,A,E,E	1	0	1	0
534	<35	ICSI	0	0	0
535	<35	IVF	8	6	2	E,A,E,E,E,E,A,E	1	0	1	0
536	<35	ICSI	4	2	2	A,A,E,E	1	0	1	0
537	38-39	IVF	7	4	3	E,E,A,E,A,A,E	1	0	1	0
538	35-37	ICSI	0	0	0
539	<35	ICSI	4	2	2	E,A,E,A	1	0	1	0
540	<35	IVF	11	8	3	E,E,A,E,E,E,A,E,E,A,E	1	0	1	0
541	35-37	IVF	6	3	3	A,E,E,A,A,E
542	38-39	ICSI	2	1	1	E,A
543	<35	ICSI	5	3	2	E,E,A,A,E	1	0	1	0
544	<35	ICSI	11	9	2	A,E,E,E,E,E,A,E,E,E,E	1	0	1	0
545	38-39	ICSI	3	2	1	A,E,E	1	0	1	0
546	38-39	ICSI	1	1	0	E	1	0	1	0
547	<35	ICSI	2	2	0	E,E
548	<35	ICSI	6	4	2	E,A,E,E,E,A	1	0	1	0
549	<35	ICSI	7	5	2	A,E,E,E,E,A,E	1	0	1	0
550	<35	ICSI	9	8	1	E,E,E,E,E,E,E,E,A	1	0	1	0
551	<35	ICSI	6	4	2	E,E,E,E,A,A	1	0	1	0
552	35-37	IVF	1	1	0	E
553	<35	ICSI	4	3	1	E,E,A,E	1	0	1	0
554	<35	IVF	4	3	1	E,A,E,E	1	0	1	0
555	<35	IVF	4	1	3	A,A,A,E
556	38-39	IVF	4	2	2	E,A,A,E	1	0	1	0
557	<35	ICSI	5	2	3	E,A,E,A,A	1	0	1	0
558	35-37	IVF	14	9	5	A,A,E,A,E,A,E,E,A,E,E,E,E,E	1	0	1	0
559	<35	ICSI	2	2	0	E,E
560	<35	ICSI	2	2	0	E,E	1	0	1	0
561	<35	ICSI	2	2	0	E,E
562	35-37	ICSI	4	3	1	E,E,E,A	1	0	1	0
563	35-37	ICSI	3	3	0	E,E,E	1	0	1	0
564	38-39	IVF	2	2	0	E,E	1	0	1	0
565	<35	ICSI	7	6	1	E,A,E,E,E,E,E	1	0	1	0
566	<35	IVF	2	2	0	E,E
567	<35	ICSI	5	3	2	A,A,E,E,E	1	0	1	0
568	35-37	ICSI	7	4	3	A,E,E,A,E,A,A	1	0	1	0
569	<35	ICSI	0	0	0
570	<35	ICSI	4	1	3	E,A,A,A	1	0	1	0
571	35-37	ICSI	4	2	2	E,A,A,E
572	<35	ICSI	7	5	2	E,A,E,E,E,A,E	1	0	1	0
573	<35	IVF	6	4	2	E,E,E,E,A,A	1	0	1	0
574	<35	ICSI	9	7	2	A,E,A,E,E,E,E,E,E	1	0	1	0
575	35-37	IVF	5	3	2	A,A,E,E,E	1	0	1	0
576	<35	IVF	4	2	2	E,E,A,A
577	<35	ICSI	9	8	1	E,E,E,E,E,A,E,E,E	1	0	1	0
578	<35	IVF	7	7	0	E,E,E,E,E,E,E	1	0	1	0
579	35-37	ICSI	0	0	0
580	35-37	ICSI	10	5	5	E,A,E,A,E,E,A,A,E,A	1	0	1	0
581	<35	IVF	10	10	0	E,E,E,E,E,E,E,E,E,E	1	0	1	0
582	<35	IVF	0	0	0
583	<35	IVF	8	5	3	E,A,E,E,A,E,E,A	1	0	1	0
584	38-39	IVF	5	3	2	E,A,E,E,A	1	0	1	0
585	35-37	IVF	4	2	2	E,E,A,A	1	0	1	0
586	<35	ICSI	5	4	1	E,E,E,E,A	1	0	1	0
587	<35	ICSI	0	0	0
588	<35	IVF	12	8	4	A,E,E,E,E,E,E,A,A,E,E,A	1	0	1	0
589	35-37	IVF	6	3	3	E,E,A,A,E,A	1	0	1	0
590	<35	IVF	2	1	1	E,A	1	0	1	0
591	38-39	ICSI	0	0	0
592	<35	ICSI	0	0	0
593	<35	ICSI	3	3	0	E,E,E
594	38-39	IVF	0	0	0
595	<35	ICSI	7	6	1	A,E,E,E,E,E,E	1	0	1	0
596	<35	ICSI	2	2	0	E,E	1	0	1	0
597	35-37	ICSI	5	4	1	A,E,E,E,E	1	0	1	0
598	35-37	ICSI	0	0	0
599	<35	ICSI	5	3	2	E,E,E,A,A	1	0	1	0
600	<35	IVF	5	3	2	A,E,E,A,E	1	0	1	0
601	38-39	ICSI	2	1	1	A,E	1	0	1	0
602	<35	Aban	0	0	0
603	<35	ICSI	9	5	4	A,E,A,E,E,A,E,E,A	1	0	1	0
604	<35	ICSI	0	0	0
605	<35	IVF	8	3	5	A,A,A,E,E,A,E,A	1	0	1	0
606	<35	ICSI	3	2	1	A,E,E	1	0	1	0
607	38-39	ICSI	2	1	1	E,A
608	<35	ICSI	5	4	1	E,E,E,A,E
609	<35	ICSI	5	5	0	E,E,E,E,E	1	0	1	0
610	35-37	ICSI	1	1	0	E
611	<35	IVF	3	2	1	E,E,A	1	0	1	0
612	38-39	ICSI	2	0	2	A,A
613	35-37	ICSI	6	2	4	E,A,A,A,E,A	1	0	1	0
614	<35	ICSI	5	3	2	A,E,E,E,A	1	0	1	0
615	<35	IVF	3	3	0	E,E,E	1	0	1	0
616	<35	ICSI	9	4	5	E,A,A,E,E,A,A,A,E	1	0	1	0
617	<35	IVF	5	2	3	A,A,A,E,E	1	0	1	0
618	35-37	ICSI	1	1	0	E	1	0	1	0
619	35-37	ICSI	2	2	0	E,E	1	0	1	0
620	38-39	ICSI	0	0	0
621	<35	ICSI	10	7	3	E,A,A,E,E,E,E,E,A,E	1	0	1	0
622	38-39	ICSI	7	3	4	A,E,E,A,A,E,A	1	0	1	0
623	<35	ICSI	4	4	0	E,E,E,E	1	0	1	0
624	35-37	ICSI	1	0	1	A
625	35-37	IVF	4	3	1	A,E,E,E	1	0	1	0
626	35-37	ICSI	3	2	1	E,A,E	1	0	1	0
627	35-37	ICSI	4	1	3	A,A,E,A
628	<35	ICSI	7	6	1	E,E,E,E,A,E,E	1	0	1	0
629	<35	IVF	5	4	1	A,E,E,E,E
630	<35	ICSI	5	4	1	E,E,E,E,A
631	35-37	ICSI	2	0	2	A,A
632	38-39	ICSI	5	4	1	A,E,E,E,E	1	0	1	0
633	<35	IVF	5	3	2	A,E,E,A,E	1	0	1	0
634	<35	IVF	11	7	4	E,E,A,E,E,E,E,A,E,A,A	1	0	1	0
635	<35	ICSI	7	3	4	E,E,A,A,E,A,A
636	35-37	ICSI	5	4	1	E,A,E,E,E	1	0	1	0
637	<35	ICSI	4	3	1	E,A,E,E	1	0	1	0
638	35-37	ICSI	1	1	0	E	1	0	1	0
639	<35	IVF	8	8	0	E,E,E,E,E,E,E,E	1	0	1	0
640	<35	ICSI	5	3	2	E,A,E,A,E	1	0	1	0
641	<35	ICSI	0	0	0
642	<35	ICSI	9	8	1	E,E,E,A,E,E,E,E,E	1	0	1	0
643	<35	ICSI	0	0	0
644	<35	ICSI	11	6	5	E,E,E,A,E,A,A,E,A,A,E	1	0	1	0
645	<35	ICSI	5	5	0	E,E,E,E,E	1	0	1	0
646	<35	ICSI	3	2	1	E,E,A	1	0	1	0
647	<35	ICSI	10	9	1	E,E,E,E,E,E,E,A,E,E	1	0	1	0
648	38-39	ICSI	2	0	2	A,A
649	<35	ICSI	11	9	2	E,E,A,E,E,E,E,E,E,A,E	1	0	1	0
650	<35	IVF	4	3	1	E,E,E,A	1	0	1	0
651	35-37	ICSI	1	1	0	E
652	<35	ICSI	3	2	1	E,E,A
653	<35	IVF	7	4	3	E,A,A,E,E,A,E	1	0	1	0
654	<35	ICSI	9	8	1	E,A,E,E,E,E,E,E,E	1	0	1	0
655	<35	ICSI	5	2	3	A,E,E,A,A	1	0	1	0
656	<35	IVF	4	4	0	E,E,E,E	1	0	1	0
657	<35	IVF	7	6	1	E,E,E,E,E,E,A	1	0	1	0
658	<35	ICSI	5	5	0	E,E,E,E,E	1	0	1	0
659	<35	ICSI	2	2	0	E,E	1	0	1	0
660	<35	ICSI	5	4	1	E,E,E,A,E
661	<35	ICSI	9	6	3	E,E,E,A,E,A,E,A,E	1	0	1	0
662	35-37	ICSI	4	4	0	E,E,E,E	1	0	1	0
663	<35	IVF	6	5	1	E,E,A,E,E,E	1	0	1	0
664	38-39	ICSI	4	3	1	A,E,E,E	1	0	1	0
665	38-39	ICSI	0	0	0
666	<35	ICSI	7	4	3	E,E,A,A,A,E,A	1	0	1	0
667	<35	IVF	4	3	1	E,E,A,E	1	0	1	0
668	<35	ICSI	9	6	3	E,E,E,A,E,A,E,A,E	1	0	1	0
669	35-37	IVF	6	3	3	A,E,E,E,A,A	1	0	1	0
670	<35	ICSI	4	2	2	E,A,A,E
671	35-37	ICSI	2	2	0	E,E
672	<35	ICSI	4	4	0	E,E,E,E	1	0	1	0
673	<35	IVF	7	3	4	E,E,A,A,A,E,A	1	0	1	0
674	<35	IVF	4	2	2	E,A,E,A
675	<35	ICSI	0	0	0
676	38-39	ICSI	0	0	0
677	<35	IVF	3	3	0	E,E,E	1	0	1	0
678	<35	ICSI	5	2	3	E,A,A,A,E
679	<35	IVF	1	1	0	E
680	38-39	ICSI	0	0	0
681	<35	ICSI	2	1	1	A,E	1	0	1	0
682	<35	ICSI	0	0	0
683	<35	ICSI	2	1	1	A,E	1	0	1	0
684	<35	IVF	4	1	3	A,A,E,A	1	0	1	0
685	<35	IVF	4	3	1	E,E,E,A	1	0	1	0
686	<35	ICSI	0	0	0
687	<35	ICSI	3	3	0	E,E,E	1	0	1	0
688	38-39	ICSI	4	0	4	A,A,A,A
689	38-39	ICSI	0	0	0
690	35-37	ICSI	9	1	8	A,A,A,E,A,A,A,A,A
691	<35	ICSI	5	3	2	A,E,A,E,A
692	<35	IVF	9	7	2	E,E,E,A,E,E,A,E,E	1	0	1	0
693	<35	ICSI	0	0	0
694	<35	IVF	6	4	2	E,E,A,E,A,E	1	0	1	0
695	38-39	ICSI	9	8	1	E,E,A,E,E,E,E,E,E	1	0	1	0
696	<35	ICSI	3	1	2	A,E,A	1	0	1	0
697	<35	ICSI	2	2	0	E,E	1	0	1	0
698	<35	ICSI	6	5	1	E,A,E,E,E,E	1	0	1	0
699	<35	ICSI	6	4	2	E,E,A,E,E,A	1	0	1	0
700	35-37	ICSI	2	1	1	E,A
701	<35	ICSI	6	2	4	A,A,A,E,E,A	1	0	1	0
702	<35	IVF	5	4	1	E,E,E,A,E	1	0	1	0
703	38-39	ICSI	1	0	1	A
704	38-39	ICSI	7	3	4	A,A,A,A,E,E,E	1	0	1	0
705	<35	ICSI	9	8	1	E,E,E,E,E,E,A,E,E	1	0	1	0
706	35-37	ICSI	6	1	5	A,A,A,E,A,A
707	<35	IVF	7	6	1	E,E,E,E,A,E,E	1	0	1	0
708	<35	IVF	7	5	2	E,E,E,A,E,E,A
709	<35	ICSI	5	4	1	A,E,E,E,E	1	0	1	0
710	<35	IVF	7	5	2	A,E,E,A,E,E,E	1	0	1	0
711	<35	ICSI	8	5	3	E,E,E,E,A,A,E,A	1	0	1	0
712	<35	IVF	6	5	1	E,A,E,E,E,E	1	0	1	0
713	38-39	IVF	4	2	2	E,A,A,E
714	<35	ICSI	4	2	2	A,E,A,E
715	35-37	IVF	4	4	0	E,E,E,E	1	0	1	0
716	<35	ICSI	3	2	1	E,A,E
717	<35	ICSI	6	5	1	A,E,E,E,E,E	1	0	1	0
718	35-37	IVF	4	4	0	E,E,E,E	1	0	1	0
719	<35	IVF	11	8	3	E,E,E,A,A,E,E,A,E,E,E	1	0	1	0
720	<35	ICSI	7	4	3	E,E,E,A,A,E,A	1	0	1	0
721	<35	ICSI	0	0	0
722	<35	ICSI	4	3	1	E,E,A,E	1	0	1	0
723	35-37	ICSI	7	3	4	A,A,A,E,A,E,E	1	0	1	0
724	<35	ICSI	5	2	3	A,E,A,E,A
725	<35	IVF	3	1	2	A,E,A	1	0	1	0
726	<35	IVF	3	3	0	E,E,E
727	<35	ICSI	9	9	0	E,E,E,E,E,E,E,E,E	1	0	1	0
728	<35	ICSI	8	3	5	A,A,E,A,E,E,A,A
729	<35	ICSI	3	2	1	A,E,E	1	0	1	0
730	35-37	ICSI	5	3	2	E,E,A,E,A
731	<35	ICSI	7	3	4	E,A,E,A,A,E,A	1	0	1	0
732	<35	IVF	4	3	1	E,A,E,E	1	0	1	0
733	<35	ICSI	8	6	2	A,E,E,E,E,E,E,A	1	0	1	0
734	35-37	IVF	1	0	1	A
735	<35	IVF	4	3	1	A,E,E,E	1	0	1	0
736	<35	IVF	3	1	2	A,A,E
737	<35	ICSI	9	8	1	A,E,E,E,E,E,E,E,E	1	0	1	0
738	35-37	IVF	3	2	1	E,E,A	1	0	1	0
739	<35	ICSI	5	4	1	E,A,E,E,E	1	0	1	0
740	<35	ICSI	7	3	4	A,A,E,A,E,E,A	1	0	1	0
741	<35	ICSI	0	0	0
742	35-37	ICSI	5	5	0	E,E,E,E,E	1	0	1	0
743	<35	ICSI	4	2	2	E,A,A,E
744	<35	ICSI	3	3	0	E,E,E	1	0	1	0
745	35-37	ICSI	9	6	3	E,A,E,A,E,E,E,E,A	1	0	1	0
746	<35	ICSI	9	6	3	E,E,E,E,A,E,E,A,A	1	0	1	0
747	<35	ICSI	5	3	2	A,E,A,E,E
748	<35	ICSI	5	2	3	A,A,E,A,E	1	0	1	0
749	<35	ICSI	7	5	2	E,A,E,E,E,A,E	1	0	1	0
750	<35	IVF	4	3	1	E,E,E,A	1	0	1	0
751	<35	IVF	5	4	1	E,A,E,E,E	1	0	1	0
752	<35	ICSI	11	6	5	E,E,A,A,E,E,E,A,A,A,E	1	0	1	0
753	<35	IVF	7	6	1	E,E,A,E,E,E,E	1	0	1	0
754	<35	ICSI	5	5	0	E,E,E,E,E	1	0	1	0
755	35-37	ICSI	4	2	2	E,A,E,A
756	35-37	IVF	0	0	0
757	35-37	IVF	1	1	0	E
758	<35	IVF	4	2	2	E,A,A,E	1	0	1	0
759	35-37	ICSI	1	1	0	E
760	<35	ICSI	6	3	3	A,E,A,A,E,E
761	<35	ICSI	2	2	0	E,E	1	0	1	0
762	<35	IVF	7	5	2	E,E,E,A,E,E,A	1	0	1	0
763	<35	IVF	9	5	4	E,E,A,E,A,A,E,A,E
764	38-39	ICSI	4	1	3	E,A,A,A
765	<35	IVF	3	2	1	E,E,A
766	<35	ICSI	5	4	1	A,E,E,E,E	1	0	1	0
767	<35	IVF	2	1	1	E,A
768	38-39	ICSI	4	3	1	E,E,E,A	1	0	1	0
769	<35	ICSI	2	2	0	E,E
770	35-37	IVF	4	3	1	E,A,E,E	1	0	1	0
771	35-37	ICSI	4	4	0	E,E,E,E	1	0	1	0
772	38-39	ICSI	5	4	1	E,E,A,E,E
773	<35	IVF	4	2	2	E,A,A,E	1	0	1	0
774	<35	ICSI	10	8	2	E,E,E,E,E,E,E,A,E,A	1	0	1	0
775	<35	ICSI	1	1	0	E
776	<35	IVF	3	2	1	E,A,E
777	35-37	ICSI	0	0	0
778	35-37	ICSI	0	0	0
779	35-37	ICSI	2	0	2	A,A
780	<35	ICSI	0	0	0
781	38-39	ICSI	5	1	4	A,A,A,E,A	1	0	1	0
782	35-37	ICSI	0	0	0
783	<35	ICSI	3	2	1	E,E,A	1	0	1	0
784	<35	IVF	6	6	0	E,E,E,E,E,E	1	0	1	0
785	<35	IVF	3	3	0	E,E,E	1	0	1	0
786	35-37	ICSI	0	0	0
787	38-39	ICSI	0	0	0
788	35-37	ICSI	2	1	1	A,E
789	<35	ICSI	7	5	2	E,A,E,E,A,E,E	1	0	1	0
790	35-37	ICSI	0	0	0
791	<35	IVF	9	6	3	E,E,E,A,A,E,E,E,A	1	0	1	0
792	<35	ICSI	7	4	3	A,E,A,E,A,E,E	1	0	1	1
793	<35	ICSI	7	5	2	E,A,E,E,E,E,A	1	0	1	0
794	<35	ICSI	3	2	1	E,E,A	1	0	1	0
795	<35	ICSI	5	2	3	E,A,E,A,A	1	0	1	0
796	<35	IVF	1	1	0	E
797	35-37	ICSI	0	0	0
798	<35	ICSI	4	3	1	E,E,A,E	1	0	1	0
799	<35	ICSI	10	4	6	A,E,E,A,E,E,A,A,A,A	1	0	1	0
800	35-37	ICSI	4	4	0	E,E,E,E	1	0	1	0
801	<35	IVF	6	3	3	A,E,A,E,E,A	1	0	1	0
802	<35	IVF	0	0	0
803	<35	ICSI	0	0	0
804	38-39	ICSI	5	3	2	E,A,E,E,A
805	<35	ICSI	10	7	3	E,A,A,E,E,E,A,E,E,E	1	0	1	0
806	<35	IVF	14	8	6	E,A,E,A,E,A,A,E,A,E,A,E,E,A	1	0	1	0
807	<35	ICSI	0	0	0
808	<35	ICSI	0	0	0
809	<35	IVF	5	2	3	E,A,A,A,E	1	0	1	0
810	<35	ICSI	3	3	0	E,E,E	1	0	1	1
811	<35	ICSI	9	8	1	E,E,E,E,E,E,E,E,A	1	0	1	0
812	<35	ICSI	4	2	2	E,A,A,E	1	0	1	0
813	35-37	ICSI	0	0	0
814	<35	IVF	9	7	2	A,E,E,A,E,E,E,E,E	1	0	1	0
815	<35	ICSI	11	7	4	E,A,E,E,A,A,A,E,E,E,E	1	0	1	0
816	<35	IVF	0	0	0
817	35-37	ICSI	8	4	4	E,A,A,E,A,A,E,E	1	0	1	0
818	<35	IVF	4	3	1	E,E,E,A	1	0	1	0
819	<35	IVF	5	5	0	E,E,E,E,E	1	0	1	0
820	35-37	ICSI	4	2	2	A,E,A,E	1	0	1	0
821	35-37	ICSI	6	3	3	A,E,A,E,E,A	1	0	1	0
822	<35	ICSI	5	3	2	E,E,A,E,A
823	<35	ICSI	10	8	2	A,E,E,E,E,E,E,E,E,A	1	0	1	0
824	<35	ICSI	4	1	3	A,A,E,A	1	0	1	0
825	<35	ICSI	7	6	1	E,E,E,E,A,E,E	1	0	1	0
826	35-37	ICSI	2	1	1	A,E
827	<35	IVF	6	4	2	A,E,E,A,E,E	1	0	1	0
828	<35	Aban	0	0	0
829	<35	ICSI	3	1	2	E,A,A
830	35-37	IVF	6	2	4	E,A,A,E,A,A	1	0	1	0
831	35-37	ICSI	4	2	2	A,E,E,A	1	0	1	0
832	<35	ICSI	7	6	1	E,E,E,E,A,E,E	1	0	1	0
833	35-37	ICSI	5	1	4	A,E,A,A,A	1	0	1	0
834	38-39	ICSI	7	4	3	A,E,E,A,E,A,E	1	0	1	0
835	<35	ICSI	5	4	1	E,A,E,E,E	1	0	1	0
836	<35	ICSI	0	0	0
837	35-37	IVF	8	7	1	E,E,A,E,E,E,E,E	1	0	1	0
838	<35	ICSI	5	5	0	E,E,E,E,E	1	0	1	0
839	<35	IVF	5	5	0	E,E,E,E,E	1	0	1	0
840	38-39	IVF	14	2	12	A,A,E,A,A,A,A,A,A,A,A,E,A,A	1	0	1	0
841	<35	ICSI	7	5	2	E,A,E,E,E,E,A	1	0	1	0
842	<35	ICSI	2	1	1	A,E
843	<35	IVF	4	4	0	E,E,E,E	1	0	1	0
844	35-37	ICSI	5	4	1	E,E,E,E,A	1	0	1	0
845	38-39	IVF	0	0	0
846	<35	IVF	5	3	2	A,E,E,A,E
847	<35	IVF	10	6	4	E,A,E,E,E,A,E,A,E,A	1	0	1	0
848	35-37	ICSI	7	6	1	E,E,E,A,E,E,E	1	0	1	0
849	<35	IVF	4	3	1	A,E,E,E	1	0	1	0
850	35-37	IVF	0	0	0
851	35-37	IVF	2	1	1	A,E
852	<35	IVF	7	4	3	E,A,E,A,A,E,E	1	0	1	0
853	<35	ICSI	9	5	4	A,E,E,A,E,A,E,A,E	1	0	1	0
854	<35	ICSI	5	4	1	E,A,E,E,E	1	0	1	0
855	35-37	ICSI	14	6	8	E,E,A,E,A,E,A,A,A,A,E,A,A,E	1	0	1	0
856	35-37	ICSI	8	7	1	E,E,E,E,A,E,E,E	1	0	1	0
857	<35	ICSI	3	3	0	E,E,E	1	0	1	0
858	<35	ICSI	4	2	2	A,A,E,E	1	0	1	0
859	<35	ICSI	4	4	0	E,E,E,E	1	0	1	0
860	<35	ICSI	5	4	1	E,A,E,E,E	1	0	1	0
861	<35	IVF	5	2	3	A,E,A,A,E	1	0	1	0
862	<35	IVF	6	4	2	A,E,E,A,E,E	1	0	1	0
863	<35	ICSI	8	6	2	E,A,A,E,E,E,E,E	1	0	1	0
864	<35	ICSI	7	5	2	A,E,E,E,E,A,E	1	0	1	0
865	<35	ICSI	1	0	1	A
866	38-39	IVF	0	0	0
867	35-37	IVF	3	2	1	A,E,E
868	35-37	IVF	6	4	2	E,A,E,A,E,E	1	0	1	0
869	35-37	ICSI	3	3	0	E,E,E
870	35-37	Aban	0	0	0
871	35-37	ICSI	7	6	1	E,E,E,E,A,E,E	1	0	1	0
872	<35	ICSI	4	3	1	E,A,E,E	1	0	1	0
873	<35	ICSI	8	7	1	E,E,E,A,E,E,E,E	1	0	1	0
874	38-39	ICSI	3	2	1	E,A,E	1	0	1	0
875	35-37	ICSI	6	4	2	E,E,A,A,E,E	1	0	1	0
876	<35	IVF	5	4	1	E,A,E,E,E	1	0	1	0
877	<35	IVF	6	5	1	E,E,E,E,A,E	1	0	1	0
878	<35	IVF	3	1	2	E,A,A	1	0	1	0
879	<35	ICSI	8	5	3	E,A,E,E,E,E,A,A	1	0	1	0
880	<35	ICSI	5	2	3	A,A,E,A,E	1	0	1	0
881	35-37	ICSI	1	0	1	A
882	35-37	IVF	3	1	2	A,A,E
883	<35	ICSI	14	7	7	E,A,A,E,A,E,A,E,A,E,E,A,E,A	1	0	1	0
884	<35	IVF	4	3	1	E,E,A,E	1	0	1	0
885	<35	ICSI	2	2	0	E,E
886	<35	IVF	8	5	3	E,E,A,E,E,A,E,A	1	0	1	0
887	<35	Aban	0	0	0
888	<35	ICSI	4	2	2	A,A,E,E	1	0	1	0
889	38-39	IVF	2	1	1	E,A
890	38-39	IVF	5	3	2	A,E,E,E,A	1	0	1	0
891	35-37	ICSI	0	0	0
892	<35	ICSI	11	10	1	E,E,E,E,E,E,E,A,E,E,E	1	0	1	0
893	<35	ICSI	5	3	2	E,A,A,E,E	1	0	1	0
894	<35	ICSI	6	5	1	E,E,A,E,E,E	1	0	1	0
895	35-37	ICSI	7	5	2	A,E,A,E,E,E,E	1	0	1	0
896	<35	ICSI	7	5	2	E,E,E,E,A,E,A	1	0	1	0
897	35-37	ICSI	4	2	2	A,E,E,A
898	35-37	ICSI	8	6	2	E,E,E,E,E,E,A,A	1	0	1	0
899	<35	IVF	1	1	0	E
900	<35	ICSI	2	2	0	E,E
901	<35	ICSI	11	8	3	A,E,E,E,E,E,E,A,E,A,E	1	0	1	0
902	35-37	ICSI	2	0	2	A,A
903	35-37	IVF	0	0	0
904	<35	ICSI	0	0	0
905	38-39	IVF	4	3	1	E,E,E,A	1	0	1	0
906	<35	ICSI	2	1	1	A,E
907	<35	ICSI	5	4	1	E,E,E,A,E	1	0	1	0
908	<35	IVF	2	2	0	E,E	1	0	1	0
909	38-39	ICSI	2	1	1	E,A	1	0	1	0
910	<35	IVF	8	6	2	A,E,E,A,E,E,E,E	1	0	1	0
911	35-37	ICSI	6	2	4	E,A,A,E,A,A	1	0	1	0
912	<35	IVF	6	3	3	E,E,E,A,A,A	1	0	1	0
913	<35	ICSI	14	9	5	A,E,A,A,E,E,A,E,E,E,E,A,E,E	1	0	1	0
914	<35	ICSI	1	1	0	E
915	<35	IVF	4	3	1	E,E,A,E	1	0	1	0
916	35-37	IVF	2	2	0	E,E	1	0	1	0
917	35-37	ICSI	4	3	1	E,A,E,E	1	0	1	0
918	<35	ICSI	8	6	2	E,A,E,E,E,A,E,E	1	0	1	0
919	35-37	ICSI	4	3	1	E,E,E,A	1	0	1	0
920	<35	ICSI	10	6	4	E,E,A,E,E,A,A,E,E,A	1	0	1	0
921	35-37	ICSI	0	0	0
922	38-39	IVF	0	0	0
923	<35	ICSI	4	3	1	E,E,A,E	1	0	1	0
924	<35	ICSI	2	2	0	E,E
925	38-39	ICSI	0	0	0
926	<35	ICSI	6	2	4	A,E,E,A,A,A	1	0	1	0
927	<35	ICSI	3	2	1	E,E,A	1	0	1	0
928	38-39	ICSI	4	3	1	A,E,E,E
929	<35	ICSI	7	6	1	E,E,A,E,E,E,E	1	0	1	0
930	35-37	ICSI	3	3	0	E,E,E
931	<35	ICSI	8	7	1	E,E,E,E,E,E,A,E	1	0	1	0
932	35-37	IVF	10	6	4	A,E,E,E,E,E,E,A,A,A	1	0	1	0
933	<35	IVF	7	4	3	A,E,A,A,E,E,E	1	0	1	0
934	<35	ICSI	5	5	0	E,E,E,E,E	1	0	1	0
935	<35	ICSI	4	3	1	A,E,E,E	1	0	1	0
936	<35	IVF	14	9	5	E,A,E,A,E,A,E,E,A,E,A,A,A,E	1	0	1	0
937	<35	IVF	7	6	1	E,E,E,E,E,E,A	1	0	1	0
938	38-39	ICSI	2	0	2	A,A
939	35-37	ICSI	2	2	0	E,E	1	0	1	0
940	<35	IVF	7	4	3	A,E,A,E,A,A,E	1	0	1	0
941	<35	ICSI	4	2	2	A,A,E,E
942	<35	IVF	8	6	2	A,A,E,E,E,E,E,E	1	0	1	0
943	35-37	ICSI	0	0	0
944	<35	IVF	7	6	1	E,E,A,E,E,E,E	1	0	1	0
945	<35	IVF	2	2	0	E,E	1	0	1	0
946	35-37	ICSI	0	0	0
947	38-39	IVF	0	0	0
948	<35	ICSI	8	3	5	A,A,E,E,A,A,E,A	1	0	1	0
949	<35	ICSI	2	1	1	A,E
950	35-37	ICSI	0	0	0
951	<35	IVF	0	0	0
952	<35	IVF	2	2	0	E,E
953	35-37	ICSI	6	5	1	E,E,E,E,E,A	1	0	1	0
954	35-37	IVF	4	2	2	E,A,A,E	1	0	1	0
955	35-37	ICSI	5	3	2	A,E,A,E,E	1	0	1	0
956	<35	ICSI	5	4	1	E,A,E,E,E	1	0	1	0
957	38-39	ICSI	2	2	0	E,E	1	0	1	0
958	35-37	ICSI	4	1	3	E,A,A,A	1	0	1	0
959	<35	IVF	4	2	2	E,A,E,A	1	0	1	0
960	<35	ICSI	9	7	2	A,E,E,E,E,A,E,E,E	1	0	1	0
961	<35	ICSI	3	2	1	A,E,E
962	35-37	ICSI	6	5	1	E,E,E,A,E,E	1	0	1	0
963	<35	IVF	4	3	1	E,A,E,E
964	38-39	ICSI	0	0	0
965	<35	ICSI	11	9	2	E,E,A,A,E,E,E,E,E,E,E	1	0	1	0
966	38-39	ICSI	2	1	1	E,A
967	35-37	ICSI	4	2	2	E,A,E,A	1	0	1	0
968	<35	ICSI	4	3	1	E,A,E,E	1	0	1	0
969	<35	ICSI	1	0	1	A
970	38-39	ICSI	5	4	1	E,A,E,E,E	1	0	1	0
971	35-37	ICSI	0	0	0
972	<35	IVF	0	0	0
973	<35	IVF	0	0	0
974	38-39	ICSI	4	2	2	A,E,A,E	1	0	1	0
975	<35	ICSI	4	3	1	E,A,E,E	1	0	1	0
976	<35	IVF	2	1	1	E,A
977	35-37	ICSI	4	2	2	E,A,E,A	1	0	1	0
978	38-39	ICSI	3	1	2	E,A,A	1	0	1	0
979	35-37	ICSI	6	2	4	A,E,A,A,E,A
980	<35	ICSI	2	2	0	E,E
981	<35	ICSI	4	2	2	A,A,E,E
982	<35	ICSI	3	3	0	E,E,E	1	0	1	0
983	<35	IVF	4	3	1	A,E,E,E	1	0	1	0
984	35-37	ICSI	3	2	1	E,A,E	1	0	1	0
985	<35	ICSI	5	3	2	E,A,E,E,A	1	0	1	0
986	<35	ICSI	0	0	0
987	35-37	ICSI	4	3	1	E,A,E,E	1	0	1	0
988	<35	ICSI	2	2	0	E,E
989	<35	ICSI	6	3	3	E,E,A,A,A,E
990	35-37	IVF	3	2	1	E,A,E	1	0	1	0
991	<35	IVF	2	2	0	E,E
992	<35	IVF	5	4	1	E,E,E,A,E	1	0	1	0
993	35-37	IVF	3	3	0	E,E,E
994	35-37	ICSI	0	0	0
995	<35	ICSI	5	3	2	A,A,E,E,E	1	0	1	0
996	35-37	IVF	8	3	5	A,A,E,E,E,A,A,A
997	35-37	ICSI	2	1	1	A,E
998	<35	ICSI	9	7	2	A,E,E,E,E,E,E,A,E	1	0	1	0
999	38-39	ICSI	1	1	0	E	1	0	1	0
1000	<35	ICSI	6	5	1	E,E,E,E,A,E	1	0	1	0
[truncated: 32 more columns]

## Sheet: 5 Characteristics
Baseline characteristics and diagnostic accuracy measures stratified for maternal age
Virtual women (cycles) started (n)	1000
Women <35 y (n); %	652; 65.2
Cycles with embryos suitable for transfer or testing (n); %	580; 89.0
Embryos suitable for transfer or testing (n); %; median (range)	3225; 72.1; 5 (1-14)
Diploid (n); %, median (range)	2309; 71.6; (0-11)
Aneuploid (n); %, median (range)	916; 28.4; 1 (0-9)
Embryos transferred, without testing, to achieve a first live birth event (n)	1512
Positive predictive value [TP/(TP+FP)]; %	396/416; 95.2
Negative predictive value [TN/(TN+FN)]; %	440/1096; 40.1
Live birth events (n)/fresh transfers (n); %	169/580; 29.1
Miscarriages (n)/fresh clinical pregnancies (n); %	22/191; 11.5
Women 35-37 y (n); %	238; 23.8
Cycles with embryos suitable for transfer or testing (n); %	203; 85.3
Embryos suitable for transfer or testing (n); %; median (range)	904; 20.2; 4 (1-14)
Diploid (n); %, median (range)	583; 64.5; 3 (0-10)
Aneuploid (n); %, median (range)	321; 35.5; 1 (0-8)
Embryos transferred, without testing, to achieve a first live birth event (n)	469
Positive predictive value [TP/(TP+FP)]; %	156/162; 96.3
Negative predictive value [TN/(TN+FN)]; %	129/307; 42.0
Live birth events (n)/fresh transfers (n); %	58/203; 28.6
Miscarriages (n)/fresh clinical pregnancies (n); %	2/60; 3.3
Women 38-39 y (n); %	110; 11.0
Cycles with embryos suitable for transfer or testing (n); %	87; 79.1
Embryos suitable for transfer or testing (n); %; median (range)	347; 7.8; 4 (1-14)
Diploid (n); %, median (range)	181; 52.2; 2 (0-8)
Aneuploid (n); %, median (range)	166; 47.8; 2 (0-11)
Embryos transferred, without testing, to achieve a first live birth event (n)	223
Positive predictive value [TP/(TP+FP)]; %	102/105; 97.1
Negative predictive value [TN/TN+FN)]; %	46/118; 39.0
Live birth events (n)/fresh transfers (n); %	17/87; 19.5
Miscarriages (n)/fresh clinical pregnancies (n); %	3/20; 15.0

## Sheet: 6 Effect summary - cumulative
The Effect of Testing on the cumulative clinical miscarriage rate (CCMR) and cumulative live birth rate (CLBR)
	CCMR %	OR (95% CI)	P	adj OR (95% CI)	P	CLBR %	OR (95% CI)	P	adj OR (95% CI)	P
No premature trial termination
No testing	5.6	-	-	-	-	64.8
PGS1 (exclusion)	3.7	0.648 (0.424-0.991)	0.0436*	0.648 (0.424-0.991)	0.0451*	63.3	0.937 (0.78-1.125)	0.4846	0.935 (0.777-1.126)	0.4781
PGS2 (ranking)	4.6	0.813 (0.545-1.213)	0.3094	0.813 (0.545-1.213)	0.3094	64.8	1 (0.832-1.201)	1	1 (0.832-1.201)	1
PGS3 (ideal)	0	-	0*	-	-	65.2	1.018 (0.847-1.223)	0.8513	-	-
Termination 1 (2 years)
No testing	5.5	-	-	-	-	62.9	-	-	-	-
PGS1 (exclusion)	3.7	0.66 (0.431-1.011)	0.0547	-	-	62.8	0.996 (0.831-1.194)	0.9643	-	-
PGS2 (ranking)	4.5	0.81 (0.54-1.213)	0.3049	-	-	64.3	1.062 (0.885-1.275)	0.5153	-	-
PGS3 (ideal)	0	-	0*	-	-	65.2	1.105 (1.921-1.327)	0.2838	-	-
Termination 2 (4 transfer attempts)
No testing	5.5	-	-	-	-	59.4	-	-	-	-
PGS1 (exclusion)	3.6	0.642 (0.418-0.986)	0.0415	-	-	61.7	1.101 (0.92-1.317)	0.2927	-	-
PGS2 (ranking)	4.4	0.791 (0.527-1.187)	0.2568	-	-	63.2	1.174 (0.98-1.406)	0.0811	-	-
PGS3 (ideal)	0	-	0*	-	-	65.2	1.281 (1.068-1.535)	0.0074*	-	-

## Sheet: 7 LRA_PGS1
CLBR - PGS1										CCMR - PGS1
Age <38	Live birth									Age <35	Clinical miscarriage
Testing	Yes (1)	No (0)			Testing	Age	LB-ve	LB+ve		Testing	Yes (1)	No (0)			Testing	Age	LB-ve	LB+ve
Yes (1)	586	304	0.658427		1	1	304	586		Yes (1)	32	858	0.0359551		1	1	858	32
No (0)	599	291	0.673034		0	1	291	599		No (0)	47	843	0.052809		0	1	843	47
Age 38-39	Live birth				1	0	63	47		Age 38-39	Clinical miscarriage				1	0	105	5
Testing	Yes (1)	No (0)			0	0	61	49		Testing	Yes (1)	No (0)			0	0	101	9
Yes (1)	47	63	0.427273							Yes (1)	5	105	0.0454545
No (0)	49	61	0.445455		Descriptives...					No (0)	9	101	0.0818182		Descriptives...
					719 cases have Y=0; 1281 cases have Y=1.										1907 cases have Y=0; 93 cases have Y=1.
Crude OR										Crude OR
	LB+ve	LB-ve			Variable Avg SD						CM+ve	CM-ve			Variable Avg SD
Not-tested	648	352			1 0.5000 0.5000					Not-tested	56	944			1 0.5000 0.5000
PGS1	633	367			2 0.8900 0.3129					PGS1	37	963			2 0.8900 0.3129
0.78 >0.937> 1.125		p=0.484562			Iteration History...					0.424 >0.648> 0.991		p=0.043625			Iteration History...
					-2 Log Likelihood = 2612.5199 (Null Model)										-2 Log Likelihood = 752.3112 (Null Model)
					-2 Log Likelihood = 2603.9304										-2 Log Likelihood = 751.2268
Crude odds ratio		0.937			-2 Log Likelihood = 2591.0471					Crude odds ratio		0.648			-2 Log Likelihood = 749.5790
Odds ratio adjusted for age		0.936			-2 Log Likelihood = 2579.7593					Odds ratio adjusted for age		0.647			-2 Log Likelihood = 748.1086
Difference		-0.001	-0.00106724		-2 Log Likelihood = 2572.9957					Difference		-0.001	-0.00154321		-2 Log Likelihood = 747.2160
					-2 Log Likelihood = 2570.1613										-2 Log Likelihood = 746.8404
					-2 Log Likelihood = 2569.3605										-2 Log Likelihood = 746.7344
					-2 Log Likelihood = 2569.2197										-2 Log Likelihood = 746.7158
					-2 Log Likelihood = 2569.2061										-2 Log Likelihood = 746.7140
					-2 Log Likelihood = 2569.2056										-2 Log Likelihood = 746.7140
					-2 Log Likelihood = 2569.2056										-2 Log Likelihood = 746.7140
					-2 Log Likelihood = 2569.2056 (Converged)										-2 Log Likelihood = 746.7140 (Converged)
					Overall Model Fit...										Overall Model Fit...
					Chi Square= 43.3143; df=2; p= 0.0000										Chi Square= 5.5973; df=2; p= 0.0609
					Coefficients, Standard Errors, Odds Ratios, and 95% Confidence Limits...										Coefficients, Standard Errors, Odds Ratios, and 95% Confidence Limits...
					Variable Coeff. StdErr p O.R. Low -- High										Variable Coeff. StdErr p O.R. Low -- High
					1 -0.0666 0.0943 0.4796 0.9355 0.7777 1.1254										1 -0.4347 0.2168 0.0450 0.6474 0.4233 0.9903
					2 0.9451 0.1450 0.0000 2.5731 1.9368 3.4186										2 -0.3816 0.2996 0.2028 0.6828 0.3795 1.2283
					Intercept -0.2227 0.1438 0.1216										Intercept -2.4920 0.2903 0.0000

## Sheet: 8 LRA_PGS2
CLBR - PGS2										CCMR - PGS2
Age <38	Live birth									Age <38	Clinical miscarriage
Testing	Yes (1)	No (0)			Testing	Age				Testing	Yes (1)	No (0)			Testing	Age
Yes (1)	599	291	0.673034		1	1	291	599		Yes (1)	39	851	0.0438202		1	1	851	39
No (0)	599	291	0.673034		0	1	291	599		No (0)	47	843	0.052809		0	1	843	47
Age 38-39	Live birth				1	0	61	49		Age 38-39	Clinical miscarriage				1	0	103	7
Testing	Yes (1)	No (0)			0	0	61	49		Testing	Yes (1)	No (0)			0	0	101	9
Yes (1)	49	61	0.445455							Yes (1)	7	103	0.0636364
No (0)	49	61	0.445455		Descriptives...					No (0)	9	101	0.0818182		Descriptives...
					704 cases have Y=0; 1296 cases have Y=1.										1898 cases have Y=0; 102 cases have Y=1.
Crude OR										Crude OR
	LB+ve	LB-ve			Variable Avg SD						CM+ve	CM-ve			Variable Avg SD
Not-tested	648	352			1 0.5000 0.5000					Not-tested	56	944			1 0.5000 0.5000
PGS2	648	352			2 0.8900 0.3129					PGS1	46	954			2 0.8900 0.3129
OR 0.832 >1> 1.201		p=1			Iteration History...					OR 0.545 >0.813> 1.213		p=0.3094			Iteration History...
					-2 Log Likelihood = 2594.7037 (Null Model)										-2 Log Likelihood = 805.7969 (Null Model)
					-2 Log Likelihood = 2586.2598										-2 Log Likelihood = 805.1428
Crude odds ratio		1			-2 Log Likelihood = 2573.6161					Crude odds ratio		0.813			-2 Log Likelihood = 804.1670
Odds ratio adjusted for age		1			-2 Log Likelihood = 2562.5739					Odds ratio adjusted for age		0.813			-2 Log Likelihood = 803.3270
Difference		0	0		-2 Log Likelihood = 2555.9854					Difference		0	0		-2 Log Likelihood = 802.8409
					-2 Log Likelihood = 2553.2370										-2 Log Likelihood = 802.6465
					-2 Log Likelihood = 2552.4637										-2 Log Likelihood = 802.5942
					-2 Log Likelihood = 2552.3282										-2 Log Likelihood = 802.5853
					-2 Log Likelihood = 2552.3152										-2 Log Likelihood = 802.5845
					-2 Log Likelihood = 2552.3147										-2 Log Likelihood = 802.5845
					-2 Log Likelihood = 2552.3147										-2 Log Likelihood = 802.5845
					-2 Log Likelihood = 2552.3147 (Converged)										-2 Log Likelihood = 802.5845 (Converged)
					Overall Model Fit...										Overall Model Fit...
					Chi Square= 42.3890; df=2; p= 0.0000										Chi Square= 3.2124; df=2; p= 0.2006
					Coefficients, Standard Errors, Odds Ratios, and 95% Confidence Limits...										Coefficients, Standard Errors, Odds Ratios, and 95% Confidence Limits...
					Variable Coeff. StdErr p O.R. Low -- High										Variable Coeff. StdErr p O.R. Low -- High
					1 0.0000 0.0947 1.0000 1.0000 0.8306 1.2039										1 -0.2075 0.2043 0.3099 0.8126 0.5444 1.2129
					2 0.9410 0.1448 0.0000 2.5625 1.9295 3.4032										2 -0.4352 0.2823 0.1231 0.6471 0.3721 1.1252
					Intercept -0.2191 0.1437 0.1273										Intercept -2.4464 0.2759 0.0000

## Sheet: 9 LRA_PGS3
CLBR - PGS3										CCMR - PGS3	(1 CM arbitrarily assigned to each age group for PGS3)
Age <38	Live birth									Age <38	Clinical miscarriage
Testing	Yes (1)	No (0)			Testing	Age				Testing	Yes (1)	No (0)			Testing	Age
Yes (1)	603	287	0.677528		1	1	287	603		Yes (1)	1	889	0.0011236		1	1	889	1
No (0)	599	291	0.673034		0	1	291	599		No (0)	47	843	0.052809		0	1	843	47
Age 38-39	Live birth				1	0	61	49		Age 38-39	SAB				1	0	109	1
Testing	Yes (1)	No (0)			0	0	61	49		Testing	Yes (1)	No (0)			0	0	101	9
Yes (1)	49	61	0.445455							Yes (1)	1	109	0.00909091
No (0)	49	61	0.445455		Descriptives...					No (0)	9	101	0.0818182		Descriptives...
					700 cases have Y=0; 1300 cases have Y=1.										1942 cases have Y=0; 58 cases have Y=1.
Crude OR										Crude OR
	LB+ve	LB-ve			Variable Avg SD						CM+ve	CM-ve			Variable Avg SD
Not-tested	648	352			1 0.5000 0.5000					Not-tested	56	944			1 0.5000 0.5000
PGS3	652	348			2 0.8900 0.3129					PGS1	2	998			2 0.8900 0.3129
OR 0.847 >1.018> 1.223		p=0.8513			Iteration History...					OR 0.008 >0.034> 0.139		p<0.0001			Iteration History...
					-2 Log Likelihood = 2589.7866 (Null Model)										-2 Log Likelihood = 524.9948 (Null Model)
					-2 Log Likelihood = 2581.1459										-2 Log Likelihood = 514.7063
Crude odds ratio		1.018			-2 Log Likelihood = 2568.2157					Crude odds ratio		0.034			-2 Log Likelihood = 498.8677
Odds ratio adjusted for age		1.018			-2 Log Likelihood = 2556.9342					Odds ratio adjusted for age		0.034			-2 Log Likelihood = 483.6454
Difference		0	0		-2 Log Likelihood = 2550.2081					Difference		0	0		-2 Log Likelihood = 472.1679
					-2 Log Likelihood = 2547.4034										-2 Log Likelihood = 464.7706
					-2 Log Likelihood = 2546.6144										-2 Log Likelihood = 460.6967
					-2 Log Likelihood = 2546.4761										-2 Log Likelihood = 458.9243
					-2 Log Likelihood = 2546.4629										-2 Log Likelihood = 458.4155
					-2 Log Likelihood = 2546.4623										-2 Log Likelihood = 458.3478
					-2 Log Likelihood = 2546.4623										-2 Log Likelihood = 458.3458
					-2 Log Likelihood = 2546.4623 (Converged)										-2 Log Likelihood = 458.3458
															-2 Log Likelihood = 458.3458 (Converged)
					Overall Model Fit...
					Chi Square= 43.3242; df=2; p= 0.0000										Overall Model Fit...
															Chi Square= 66.6490; df=2; p= 0.0000
					Coefficients, Standard Errors, Odds Ratios, and 95% Confidence Limits...
					Variable Coeff. StdErr p O.R. Low -- High										Coefficients, Standard Errors, Odds Ratios, and 95% Confidence Limits...
					1 0.0180 0.0948 0.8496 1.0182 0.8454 1.2262										Variable Coeff. StdErr p O.R. Low -- High
					2 0.9512 0.1448 0.0000 2.5889 1.9493 3.4384										1 -3.3903 0.7211 0.0000 0.0337 0.0082 0.1385
					Intercept -0.2281 0.1437 0.1126										2 -0.5591 0.3622 0.1227 0.5717 0.2811 1.1628
															Intercept -2.3423 0.3317 0.0000
															-2 Log Likelihood = 430.2353
															-2 Log Likelihood = 430.2353
															-2 Log Likelihood = 430.2353
															-2 Log Likelihood = 430.2353
															-2 Log Likelihood = 430.2353 (Converged)
															Overall Model Fit...
															Chi Square= 80.6435; df=2; p= 0.0000
															Coefficients, Standard Errors, Odds Ratios, and 95% Confidence Limits...
															Variable Coeff. StdErr p O.R. Low -- High
															1 -23.2567 8830.8084 0.9979 0.0000 0.0000
															2 -0.4689 0.3788 0.2157 0.6257 0.2978 1.3145
															Intercept -2.4179 0.3479 0.0000

[truncated: 10 more sheets: 10 Effect - 1st transfer, 11 Costing summary, 12 Cost_PGS1_v_IVF_1, 13 Cost_PGS1_v_IVF_2, 14 Cost_PGS2_v_IVF_1, 15 Cost_PGS2_v_IVF_2, 16 Cost_PGS3_v_IVF_1, 17 Cost_PGS3_v_IVF_2, 18 Cost_PGS1_v_IVF_3, 19 HFEA Audit]
